# Supplementary material
Source: publisher site journal article supplement (https://www.dovepress.com/article/458840)
Supplement: Supplementary file 1 [file get_supplementary_file.php]

## Supplementary Material

### Supplementary Fig. 1. Flow chart of the scientometric study.

TS (“topic,” including title, abstract, author’s keywords and keywords Plus)

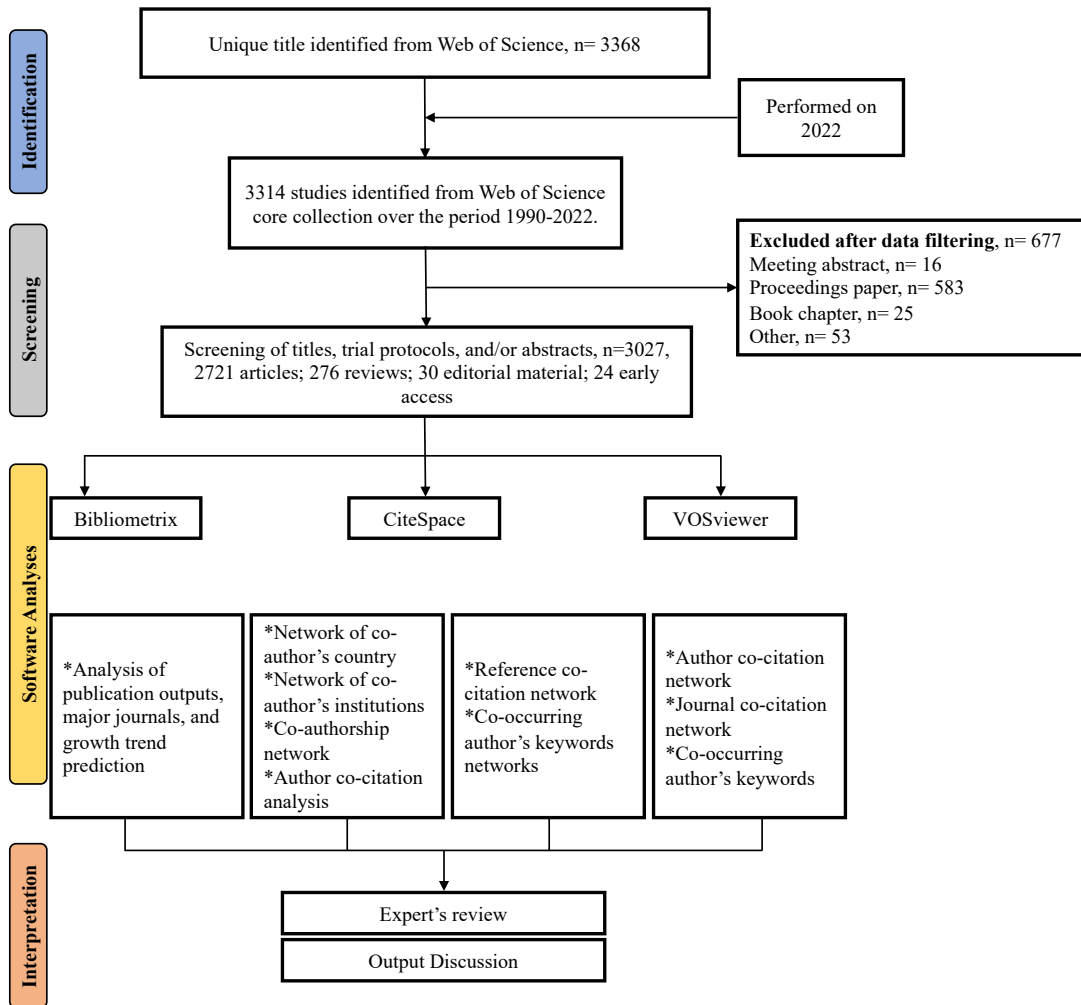

### Supplementary Fig. 2. Detail focus on most important clusters of the co-citation reference networks ranked by burstness of citations (1990-2022)

For each cluster, we report all five top keywords obtained, the selected label being the keywords that are the most cited (generated by the likelihood ratio of keywords). These keywords are highly susceptible to represent the overall topic of a cluster. Burstness is represented in each cluster with red tree-rings around nodes.

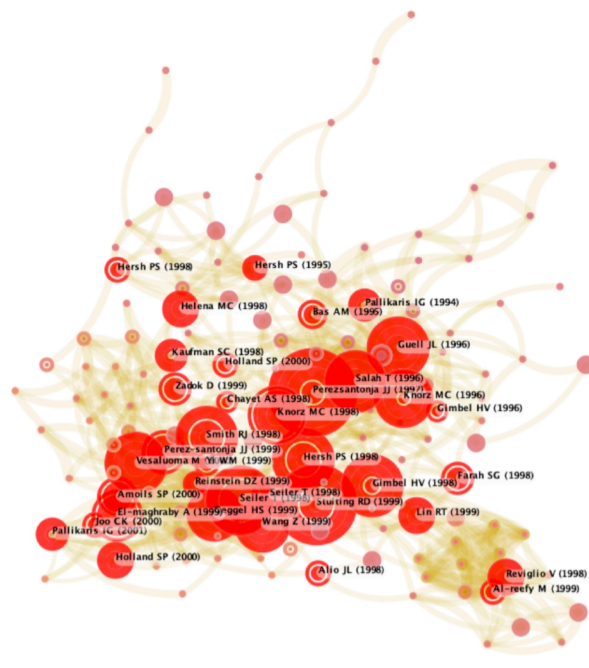

**Cluster 0- 'rk':** rk (8.02, 0.005); epikeratophakia (8.02, 0.005); nerves (8.02, 0.005); iscrs (8.02, 0.005); inflammation (5.28, 0.05)

6-bit) Advanced  
 3:42 PM CST  
 stop / laser / data  
 (Slice Length=1)  
 ex (k=25), LRF=3.0, L/N=10, LBY=5, e=1.0  
 596 (Density=0.0045)

Wt S=0.9561  
 0.918

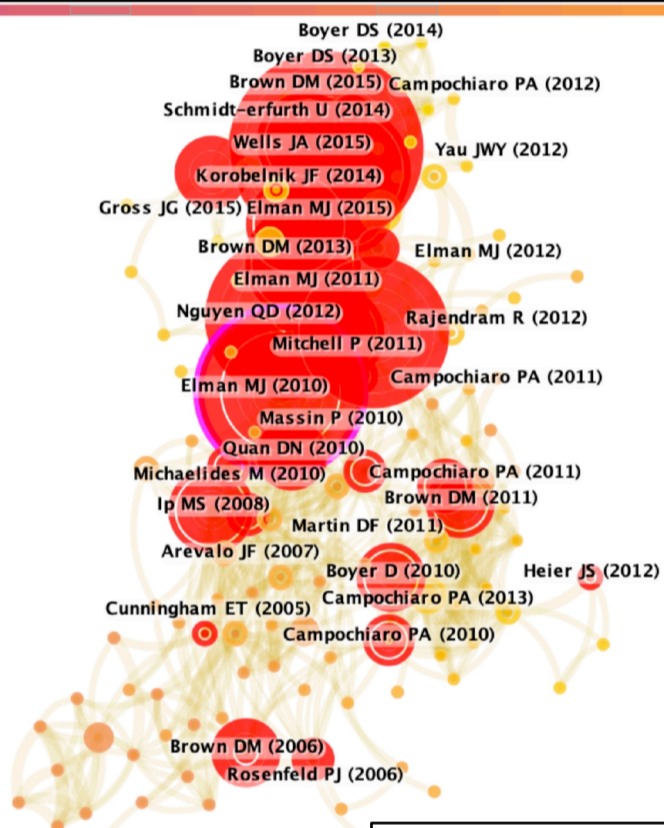

**Cluster 1- 'diabetic macular edema':** diabetic macular edema (13.76, 0.001); ranibizumab (8.75, 0.005); retinal laser photocoagulation (8.64, 0.005); intravitreal therapy (8.64, 0.005); vitrectomy (8.64, 0.005)

CiteSpace, v. 6.1.R3 (64-bit) Advanced  
 October 22, 2022 at 5:36:03 PM CST  
 Web: /users/ellen/Desktop/laser/data  
 Timespan: 1990-2022 (Slice Length=1)  
 Selection Criteria: g-index (k=25), LRF=3.0, L/N=10, LBY=5, e=1.0  
 Network N=1585, E=5696 (Density=0.0045)  
 Largest CC: 1004 (63%)  
 Nodes Labeled: 1.0%  
 Pruning: None  
 Modularity Q=0.8828  
 Weighted Mean Silhouette S=0.9561  
 Harmonic Mean(Q, S)=0.918

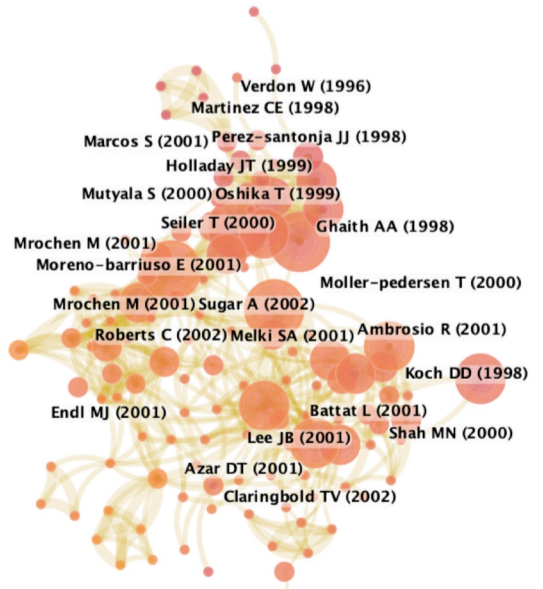

**Cluster 2- 'aberrometry':** aberrometry (15.39, 1.0E-4); refractive surgery (8.78, 0.005); contrast perception (7.6, 0.01); optical quality (7.6, 0.01); wavefront (7.6, 0.01)

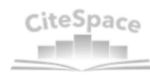

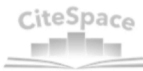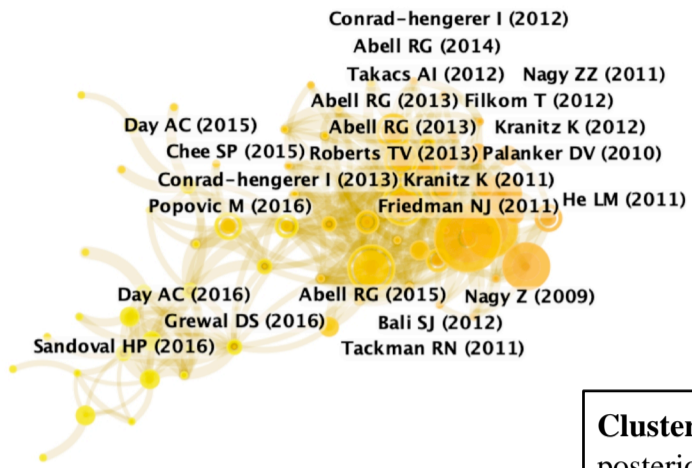

**Cluster 3- 'femtosecond laser':** femtosecond laser (6.87, 0.01); posterior capsule rupture (6.07, 0.05); femtosecond laser-assisted cataract surgery (6.07, 0.05); zonular dehiscence (6.07, 0.05); laser-induced breakdown (6.07, 0.05)

-bit) Advanced  
6:03 PM CST  
stop/laser/data  
(Slice Length=1)  
ex (k=25), LRF=3.0, L/N=10, LBY=5, e=1.0  
996 (Density=0.0045)

tte S=0.9561  
918

Lubatschowski H (2008) Blum M (2009) Caporossi A (2010)  
Ahn H (2011) Schallhorn SC (2008)  
Nubile M (2009) Chen SH (2012)  
Von JAGOWB (2009) Alfonso JF (2010)  
Reinstein DZ (2010)

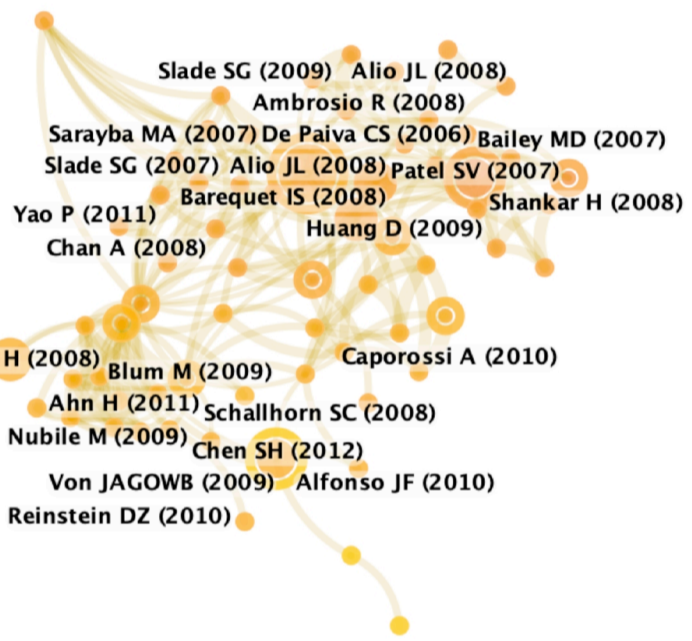

**Cluster 4- 'biomedical optics':** biomedical optics (5.05, 0.05); mmp-9 (5.05, 0.05); bioptics (5.05, 0.05); intracorneal ring (5.05, 0.05); diffuse lamellar keratitis (5.05, 0.05)

CiteSpace, v. 6.1.R3 (64-bit) Advanced  
October 22, 2022 at 5:36:03 PM CST  
WOS; I:\Users\ellen\Desktop\laser\data  
Timespan: 1990-2022 (Slice Length=1)  
Selection Criteria: q=modq (k=25), LRF=3.0, L/N=10, LBY=5, e=1.0  
Network N=1585, E=5696 (Density=0.0045)  
Largest CC: 1004 (63%)  
Nodes Labeled: 1.0%  
Pruning: None  
Modularity Q=0.8828  
Weighted Mean Silhouette S=0.9561  
Harmonic Mean(Q, S)=0.918

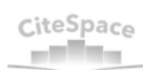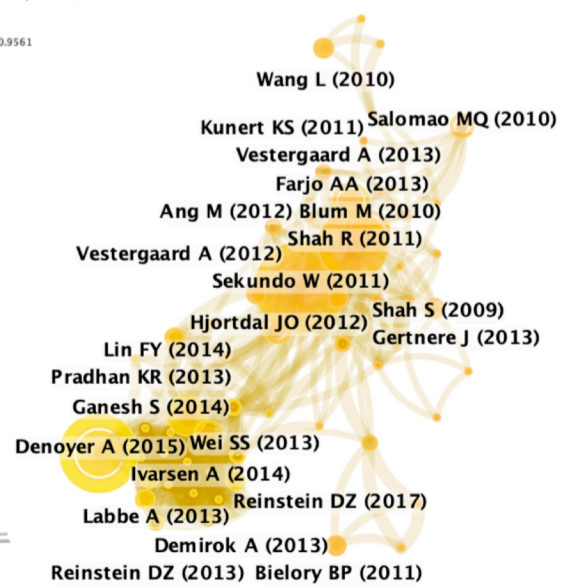

**Cluster 5- 'smile':** smile (18.21, 1.0E-4); myopia (12.05, 0.001); corneenne (5.98, 0.05); fs-lasik (5.98, 0.05); corneal biomechanics (5.98, 0.05)

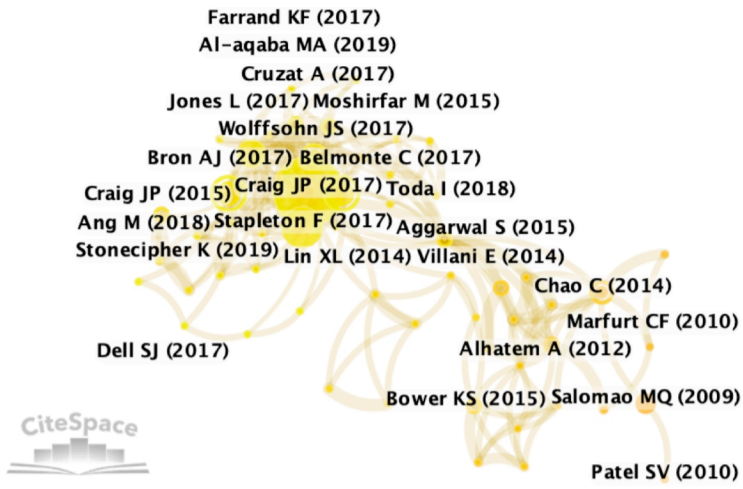

**Cluster 6- 'dry eye disease':** dry eye disease (18.69, 1.0E-4); meibomian gland dysfunction (10.61, 0.005); dry eye (8.49, 0.005); corneal nerves (7.94, 0.005); diabetic retinopathy (7.6, 0.01)

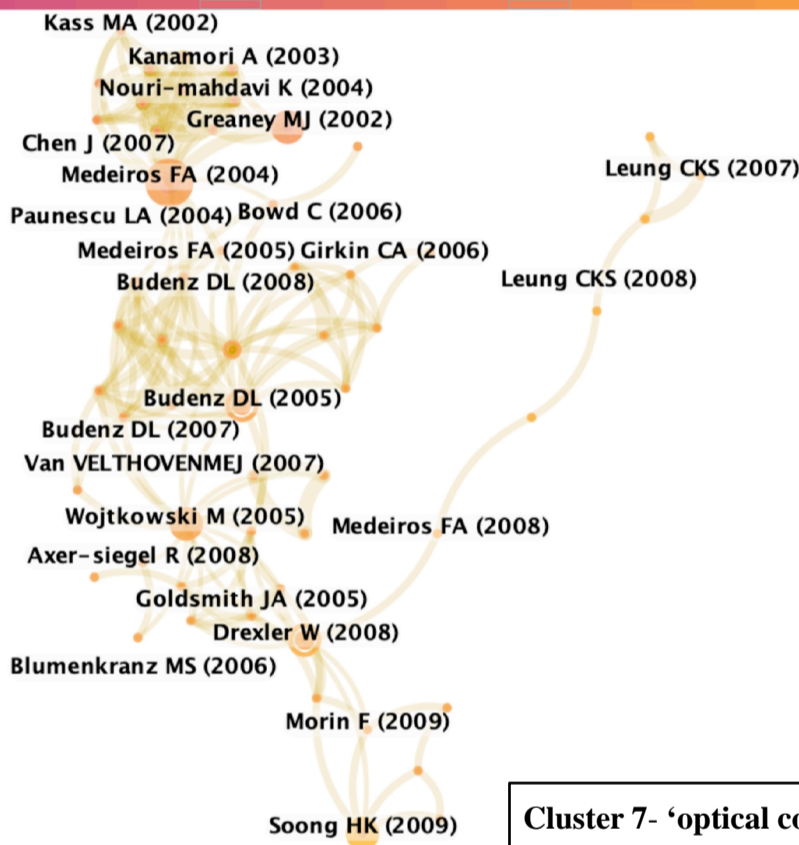

**Cluster 7- 'optical coherence tomography':** optical coherence tomography (7.3, 0.01); coherence (5.46, 0.05); adaptive optics (5.46, 0.05); ultrahigh resolution imaging (5.46, 0.05); fourier-domain optical coherence tomography (5.46, 0.05)

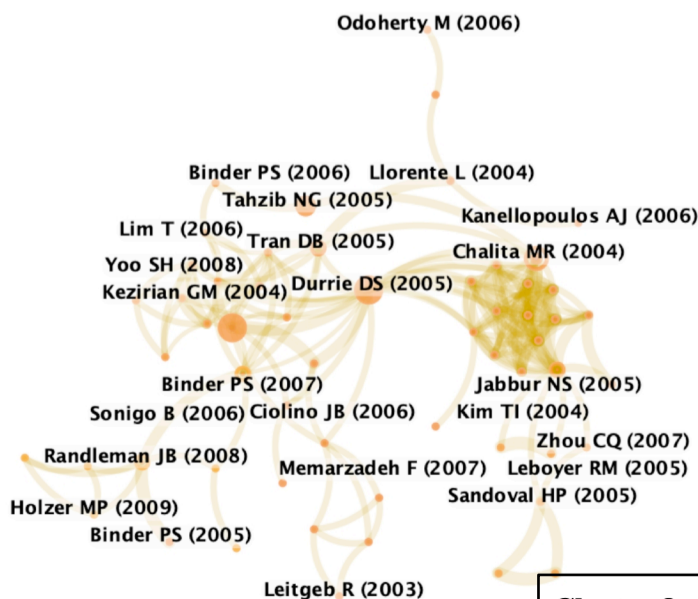

**Cluster 8- 'anterior chamber':** anterior chamber (8.89, 0.005); morphometry (8.89, 0.005); contact lens (6.14, 0.05); optical coherence tomography (5.12, 0.05); imaging (4.46, 0.05)



CiteSpace v. 5.1.R3 (64-bit) Advanced  
 October 22, 2022 at 5:56:03 PM CST  
 WoS: /Users/ellen/Desktop/laser/data  
 Timespan: 1990-2022 (Slice Length=1)  
 Selection Criteria: g-index (k=25), LRF=3.0, L/N=10, LBY=5, e=1.0  
 Network: N=1585, E=5696 (Density=0.0045)  
 Largest CC: 1004 (63%)  
 Nodes Labeled: 1.0%  
 Pruning: None  
 Modularity Q=0.8828  
 Weighted Mean Silhouette S=0.9561  
 Harmonic Mean(Q, S)=0.918

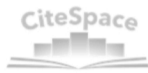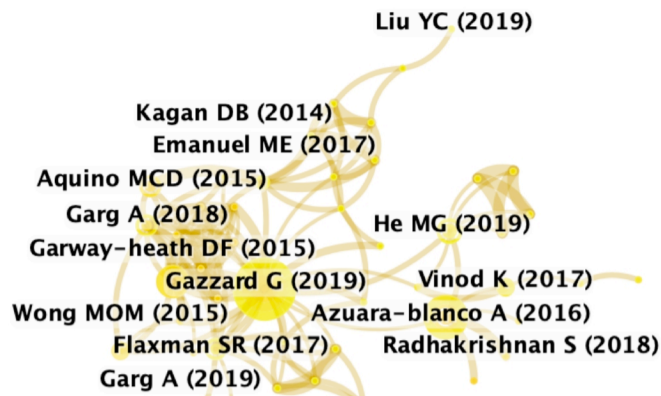

**Cluster 9- 'glaucoma':** glaucoma (16.52, 1.0E-4); trabeculectomy (8.21, 0.005); lasers (8.21, 0.005); micropulse laser (8.21, 0.005); ocular hypertension (8.21, 0.005)

64-bit Advanced  
 6:03 PM CST  
 /Users/ellen/Desktop/laser/data  
 (Slice Length=1)  
 Selection Criteria: g-index (k=25), LRF=3.0, L/N=10, LBY=5, e=1.0  
 Network: N=1585, E=5696 (Density=0.0045)

Weighted Mean Silhouette S=0.9561  
 Harmonic Mean(Q, S)=0.918

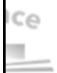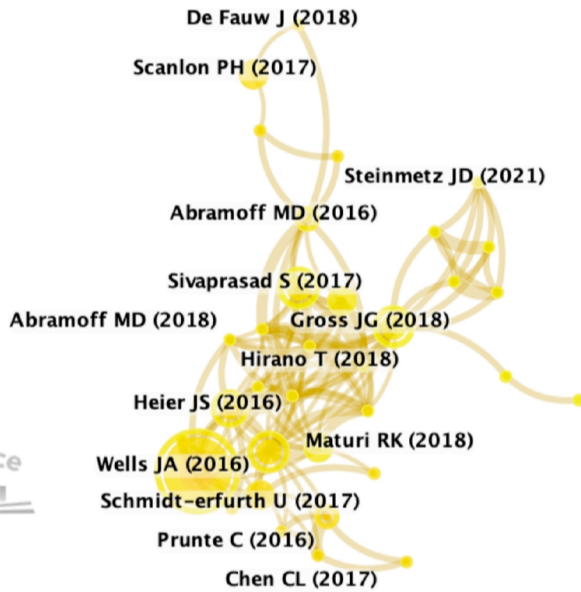

**Cluster 10- 'diabetic retinopathy':** diabetic retinopathy (12.34, 0.001); screening (9.11, 0.005); diabetic eye disease (9.11, 0.005); deep learning (9.11, 0.005); diabetic macular edema (6.14, 0.05)

Weighted Mean Silhouette S=0.9561  
 Harmonic Mean(Q, S)=0.918

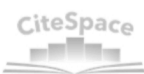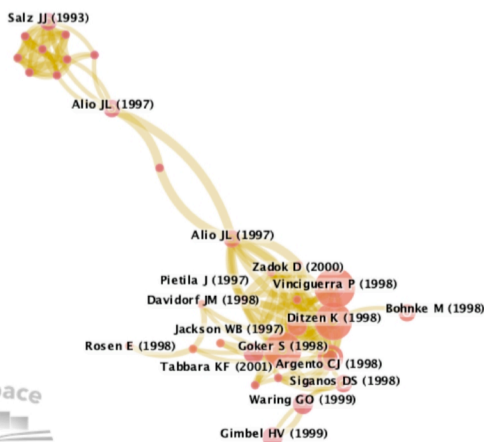

**Cluster 11- 'light emitting diode':** light emitting diode (NaN, 1.0); coherence (NaN, 1.0); regeneration (NaN, 1.0); sub-basal nerves (NaN, 1.0); microneuroma (NaN, 1.0)

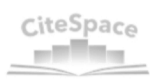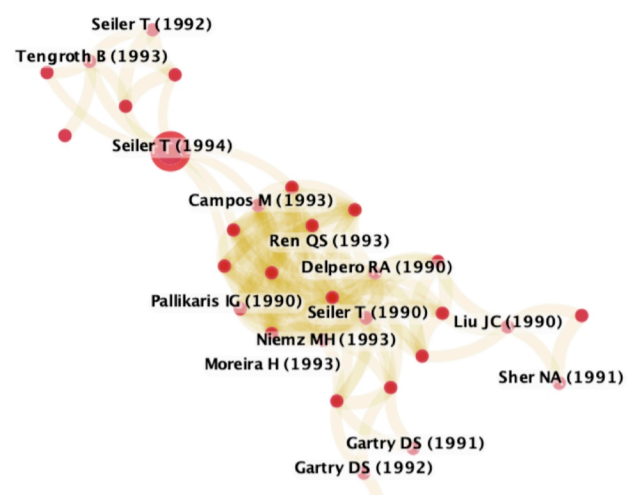

**Cluster 12- 'photorefractive keratectomy'**: photorefractive keratectomy (19.07, 1.0E-4); eye (6.26, 0.05); corneal surgery (6.26, 0.05); photoablation (6.26, 0.05); photodisruption (6.26, 0.05)

6-bit) Advanced  
6:03 PM CST  
ktop/laser/data  
(Slice Length=1)  
ex (k=2.5), LRF=3.0, L/N=10, LBY=5, e=1.0  
596 (Density=0.0045)

ite S=0.9561  
918

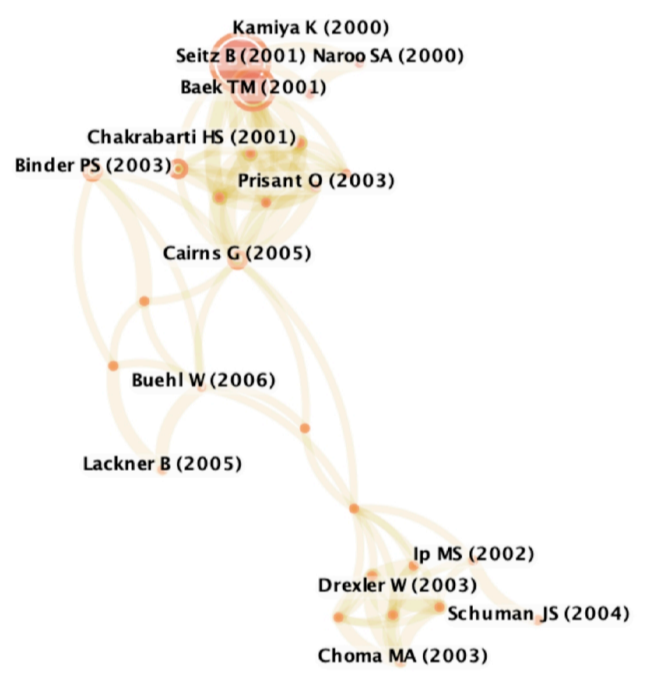

**Cluster 13- '3d'**: 3d (10.48, 0.005); uhr-oct (10.48, 0.005); retina (7.72, 0.01); diabetic retinopathy (0.16, 1.0); diabetic macular edema (0.13, 1.0)

CiteSpace, v. 6.1.R3 (64-bit) Advanced  
October 22, 2022 at 5:36:03 PM CST  
WoS: /Users/ellen/Desktop/laser/data  
Timespan: 1990-2022 (Slice Length=1)  
Selection Criteria: g-index (k=2.5), LRF=3.0, L/N=10, LBY=5, e=1.0  
Network: N=1585, E=5696 (Density=0.0045)  
Largest CC: 1004 (63%)  
Nodes Labeled: 1.0%

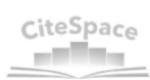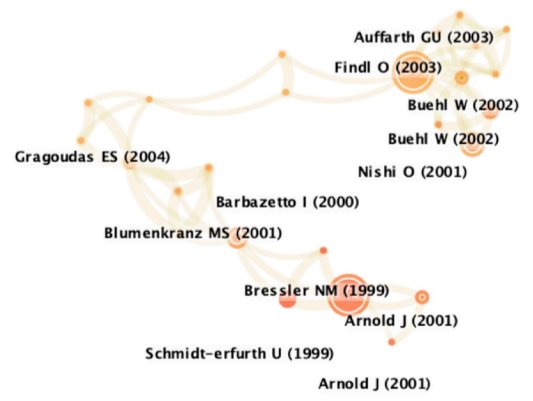

**Cluster 15- 'age-related macular degeneration (amd)'**: age-related macular degeneration (amd) (7.41, 0.01); complement factor h (cfh) (7.41, 0.01); complement factor b (bf) (7.41, 0.01); basal laminar deposit (blamd) (7.41, 0.01); bruch's membrane (7.41, 0.01)

CiteSpace, v. 6.1.R3 (64-bit) Advanced  
 October 22, 2022 at 5:36:03 PM CST  
 WoS: /Users/ellen/Desktop/laser/data  
 Timespan: 1999-2022 (Slice Length=1)  
 Selection Criteria: g-index (k=25), LRF=3.0, L/N=10, LBY=5, e=1.0  
 Network: N=1585, E=5696 (Density=0.0045)  
 Largest CC: 1004 (63%)  
 Nodes Labeled: 1.0%  
 Pruning: None  
 Modularity Q=0.8828  
 Weighted Mean Silhouette S=0.9561  
 Harmonic Mean(Q, S)=0.918

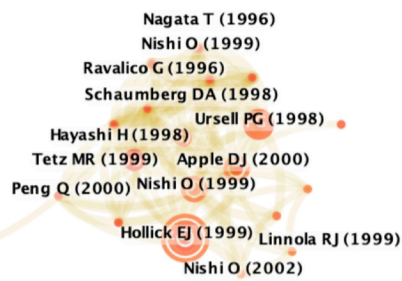

**Cluster 20- 'coherence'**: light emitting diode (NaN, 1.0); coherence (NaN, 1.0); regeneration (NaN, 1.0); sub-basal nerves (NaN, 1.0); microneuroma (NaN, 1.0)

CiteSpace, v. 6.1.R3 (64-bit) Advanced  
 October 22, 2022 at 5:36:03 PM CST  
 WoS: /Users/ellen/Desktop/laser/data  
 Timespan: 1999-2022 (Slice Length=1)  
 Selection Criteria: g-index (k=25), LRF=3.0, L/N=10, LBY=5, e=1.0  
 Network: N=1585, E=5696 (Density=0.0045)  
 Largest CC: 1004 (63%)  
 Nodes Labeled: 1.0%  
 Pruning: None  
 Modularity Q=0.8828  
 Weighted Mean Silhouette S=0.9561  
 Harmonic Mean(Q, S)=0.918

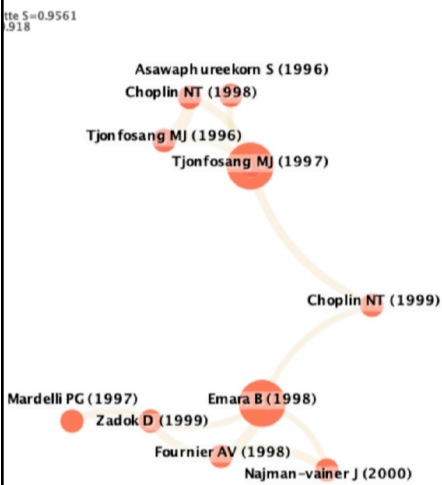

**Cluster 28- 'regeneration'**: light emitting diode (NaN, 1.0); coherence (NaN, 1.0); regeneration (NaN, 1.0); sub-basal nerves (NaN, 1.0); microneuroma (NaN, 1.0)

CiteSpace, v. 6.1.R3 (64-bit) Advanced  
 October 22, 2022 at 5:36:03 PM CST  
 WoS: /Users/ellen/Desktop/laser/data  
 Timespan: 1999-2022 (Slice Length=1)  
 Selection Criteria: g-index (k=25), LRF=3.0, L/N=10, LBY=5, e=1.0  
 Network: N=1585, E=5696 (Density=0.0045)  
 Largest CC: 1004 (63%)  
 Nodes Labeled: 1.0%  
 Pruning: None  
 Modularity Q=0.8828  
 Weighted Mean Silhouette S=0.9561  
 Harmonic Mean(Q, S)=0.918

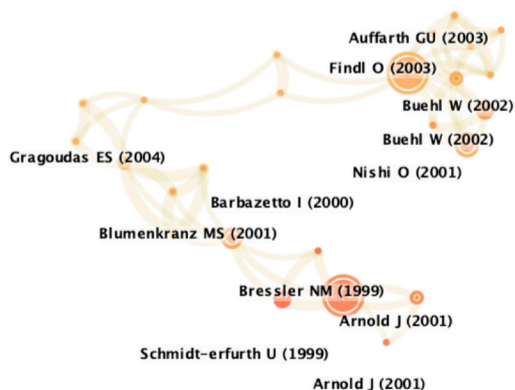

**Cluster 56- 'sub-basal nerves'**: light emitting diode (NaN, 1.0); coherence (NaN, 1.0); regeneration (NaN, 1.0); sub-basal nerves (NaN, 1.0); microneuroma (NaN, 1.0)

**Supplementary Fig. 3. Link walkthrough between clusters based on burstness dynamic for co-cited reference network (1990-2022).**



CiteSpace, v. 5.1.R3 (64-bit) Advanced  
 October 22, 2022 at 2:03:42 PM CST  
 WoS: /Users/ellen/Desktop/laser/data  
 Timespan: 1990-2022 (Slice Length=1)  
 Selection Criteria: g-index (k=25), LRF=3.0, L/N=10, LBY=5, e=1.0  
 Network: N=1585, E=5696 (Density=0.0045)  
 Largest CC: 1004 (63%)  
 Nodes Labeled: 1.0%  
 Pruning: None  
 Modularity Q=0.8828  
 Weighted Mean Silhouette S=0.9561  
 Harmonic Mean(Q, S)=0.918

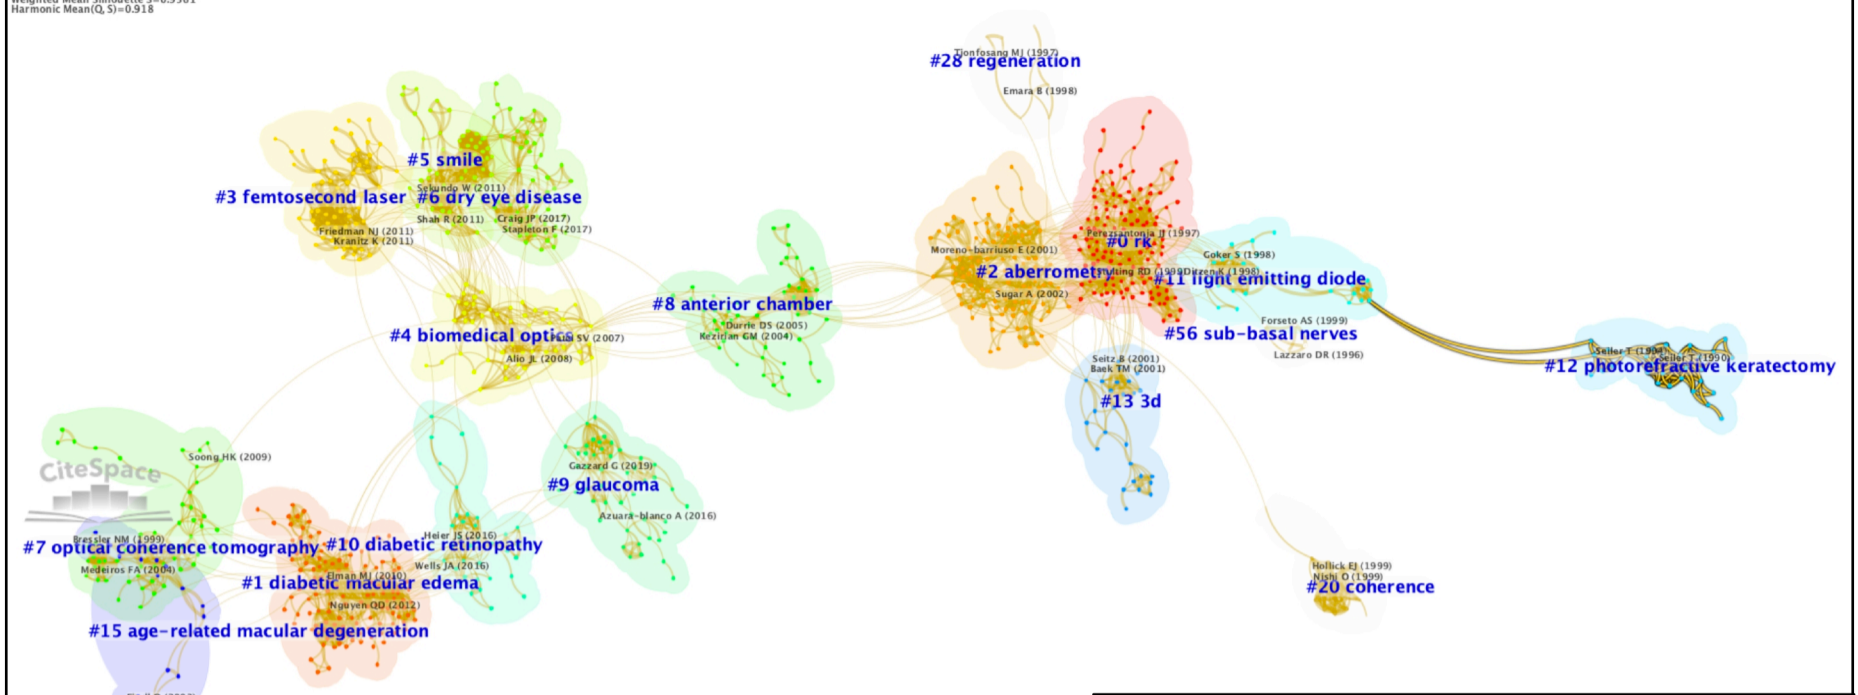

**1995- Centrality of cluster 12**

CiteSpace, v. 5.1.R3 (64-bit) Advanced  
 October 22, 2022 at 2:03:42 PM CST  
 WoS: /Users/ellen/Desktop/laser/data  
 Timespan: 1990-2022 (Slice Length=1)  
 Selection Criteria: g-index (k=25), LRF=3.0, L/N=10, LBY=5, e=1.0  
 Network: N=1585, E=5696 (Density=0.0045)  
 Largest CC: 1004 (63%)  
 Nodes Labeled: 1.0%  
 Pruning: None  
 Modularity Q=0.8828  
 Weighted Mean Silhouette S=0.9561  
 Harmonic Mean(Q, S)=0.918

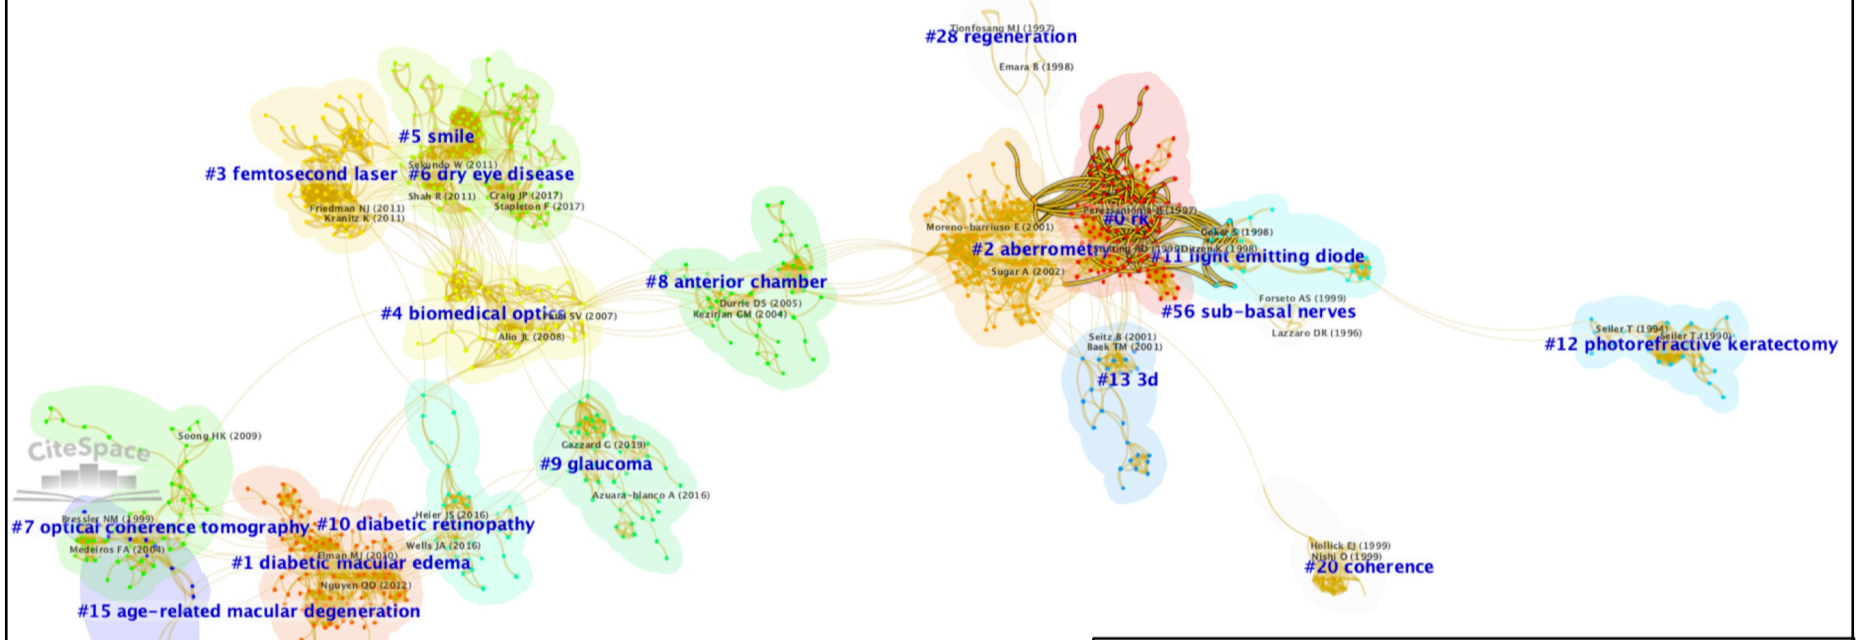

**2000- Centrality of cluster 0, and appearance of 2 and 11 from cluster 0**

CiteSpace, v. 5.1.R3 (64-bit) Advanced  
 October 22, 2022 at 2:03:42 PM CST  
 WoS: /Users/ellen/Desktop/laser/data  
 Timespan: 1990-2022 (Slice Length=1)  
 Selection Criteria: g-index (k=25), LRF=3.0, L/N=10, LBY=5, e=1.0  
 Network: N=1585, E=5696 (Density=0.0045)  
 Largest CC: 1004 (63%)  
 Nodes Labeled: 1.0%  
 Pruning: None  
 Modularity Q=0.8828  
 Weighted Mean Silhouette S=0.9561  
 Harmonic Mean(Q, S)=0.918

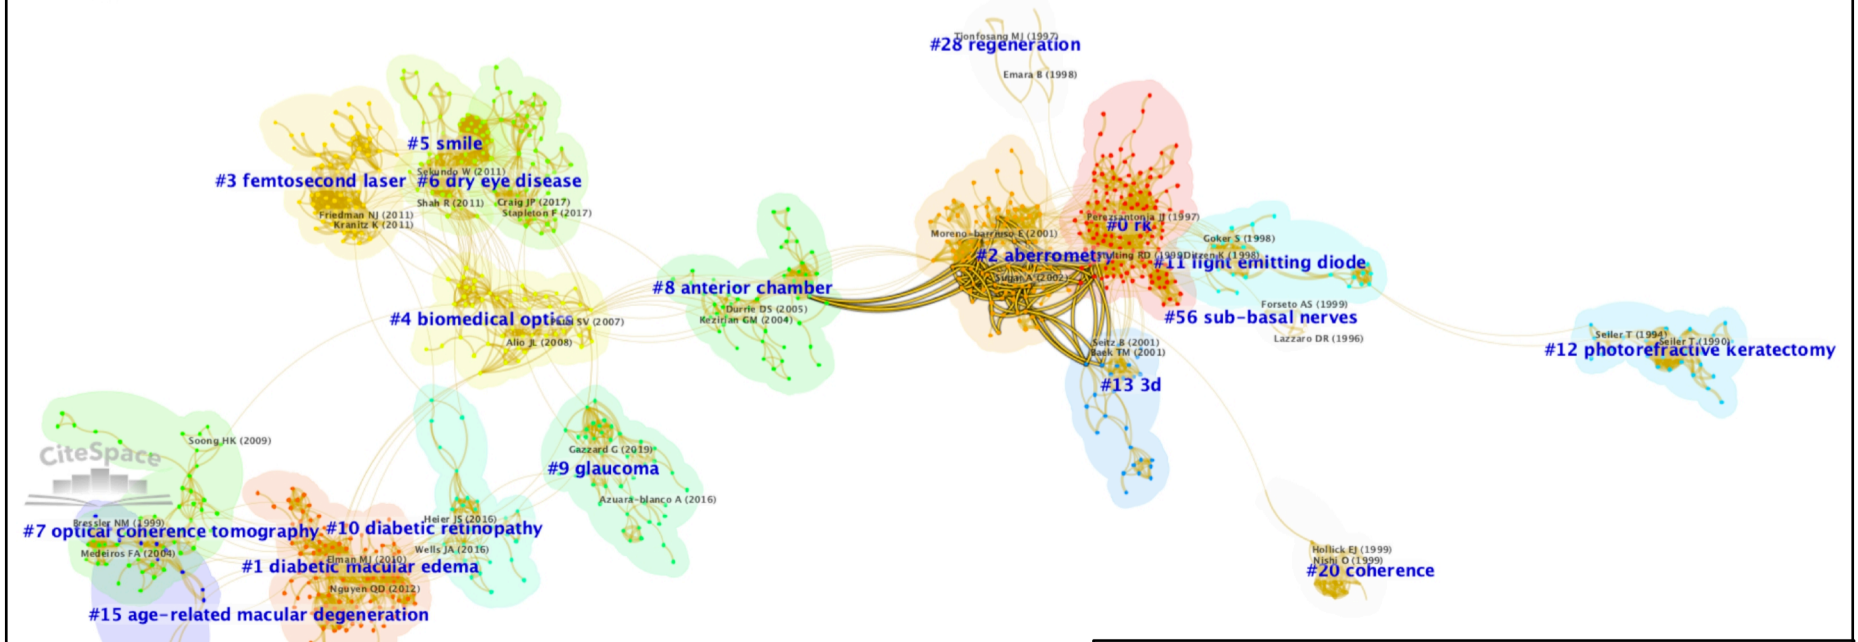

**2005- Centrality of 2, and appearance of cluster 13 from cluster 2, and cluster 13 from cluster 2 and 0**

CiteSpace, v. 5.1.R3 (64-bit) Advanced  
 October 22, 2022 at 2:03:42 PM CST  
 WoS: /Users/ellen/Desktop/laser/data  
 Timespan: 1990-2022 (Slice Length=1)  
 Selection Criteria: g-index (k=25), LRF=3.0, L/N=10, LBY=5, e=1.0  
 Network: N=1585, E=5696 (Density=0.0045)  
 Largest CC: 1004 (63%)  
 Nodes Labeled: 1.0%  
 Pruning: None  
 Modularity Q=0.8828  
 Weighted Mean Silhouette S=0.9561  
 Harmonic Mean(Q, S)=0.918

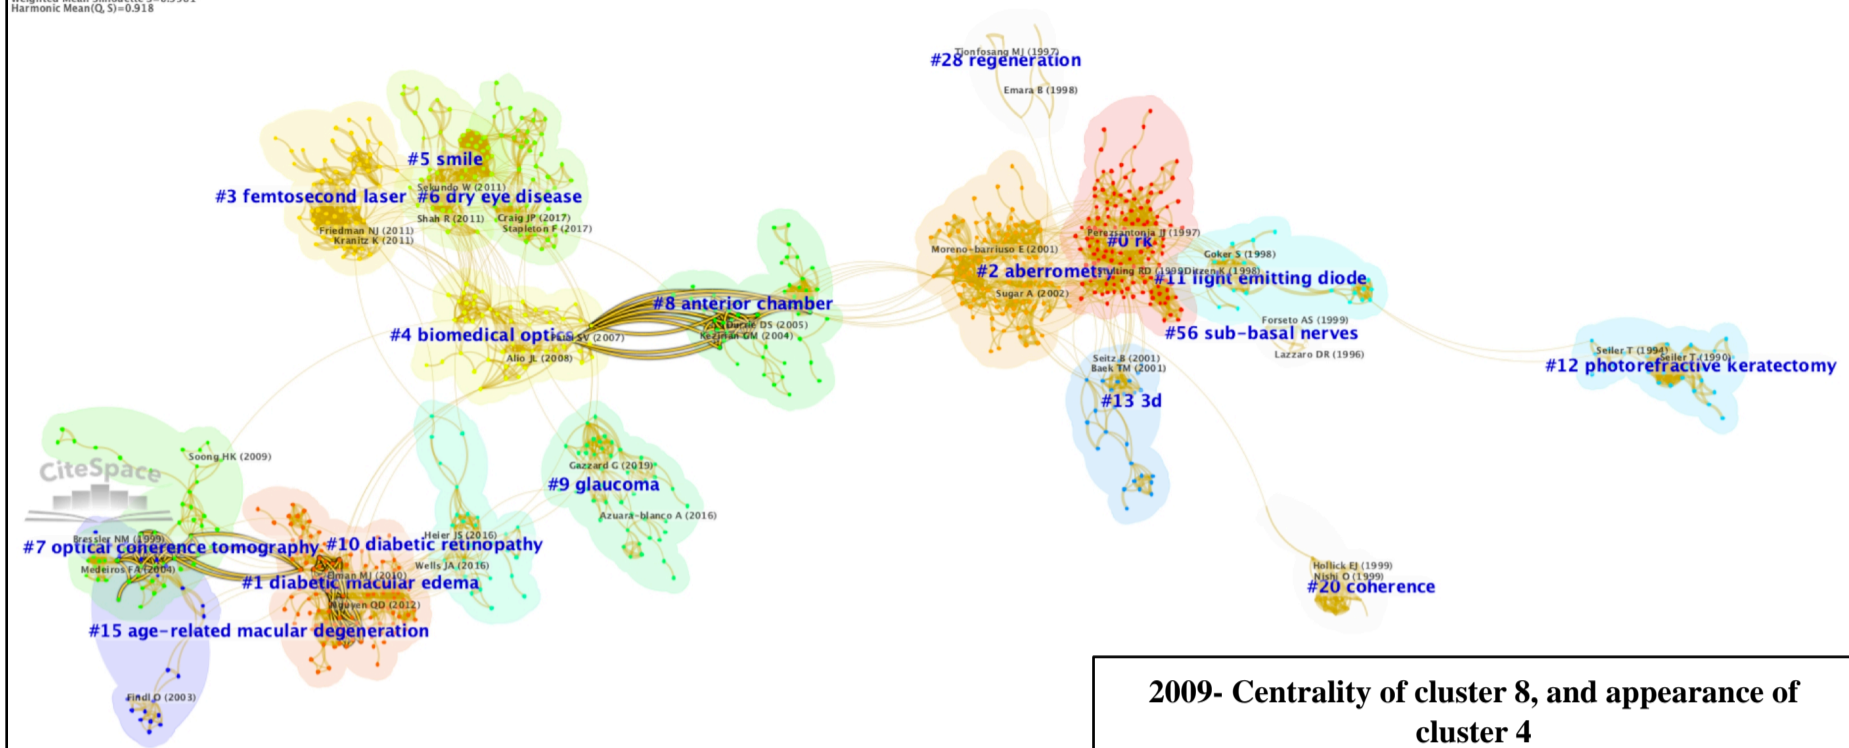

CiteSpace, v. 6.1.R3 (64-bit) Advanced  
 October 22, 2022 at 2:03:42 PM CST  
 WoS: /Users/ellen/Desktop/laser/data  
 Timespan: 1990-2022 (Slice Length=1)  
 Selection Criteria: g-index (k=25), LRF=3.0, L/N=10, LBY=5, e=1.0  
 Network: N=1585, E=5696 (Density=0.0045)  
 Largest CC: 1004 (63%)  
 Nodes Labeled: 1.0%  
 Pruning: None  
 Modularity Q=0.8828  
 Weighted Mean Silhouette S=0.9561  
 Harmonic Mean(Q, S)=0.918

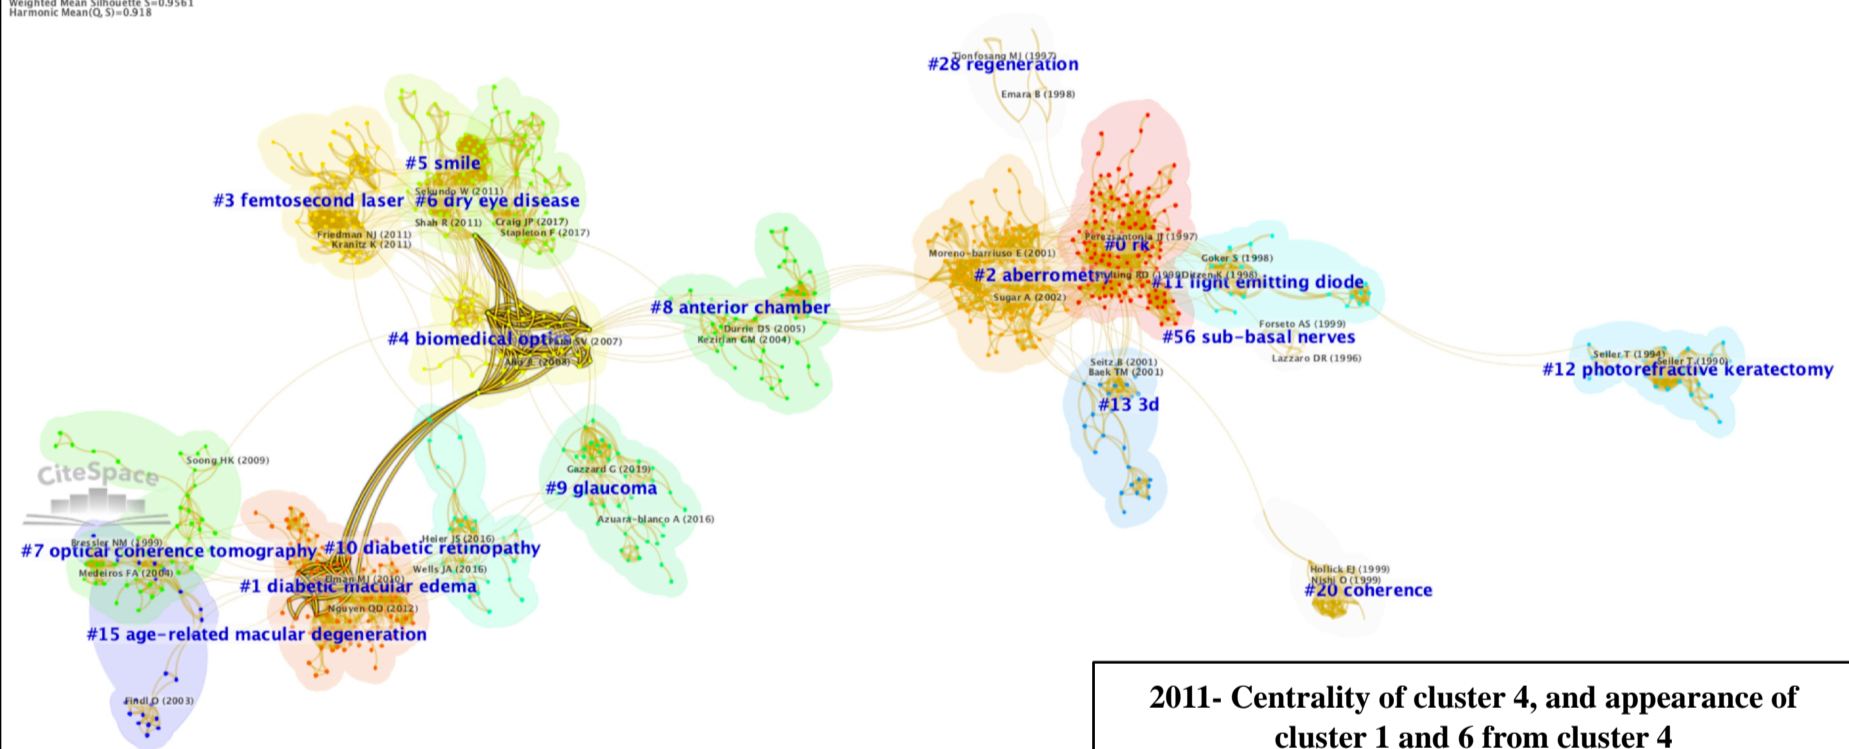

CiteSpace, v. 6.1.R3 (64-bit) Advanced  
 October 22, 2022 at 2:03:42 PM CST  
 WoS: /Users/ellen/Desktop/laser/data  
 Timespan: 1990-2022 (Slice Length=1)  
 Selection Criteria: g-index (k=25), LRF=3.0, L/N=10, LBY=5, e=1.0  
 Network: N=1585, E=5696 (Density=0.0045)  
 Largest CC: 1004 (63%)  
 Nodes Labeled: 1.0%  
 Pruning: None  
 Modularity Q=0.8828  
 Weighted Mean Silhouette S=0.9561  
 Harmonic Mean(Q, S)=0.918

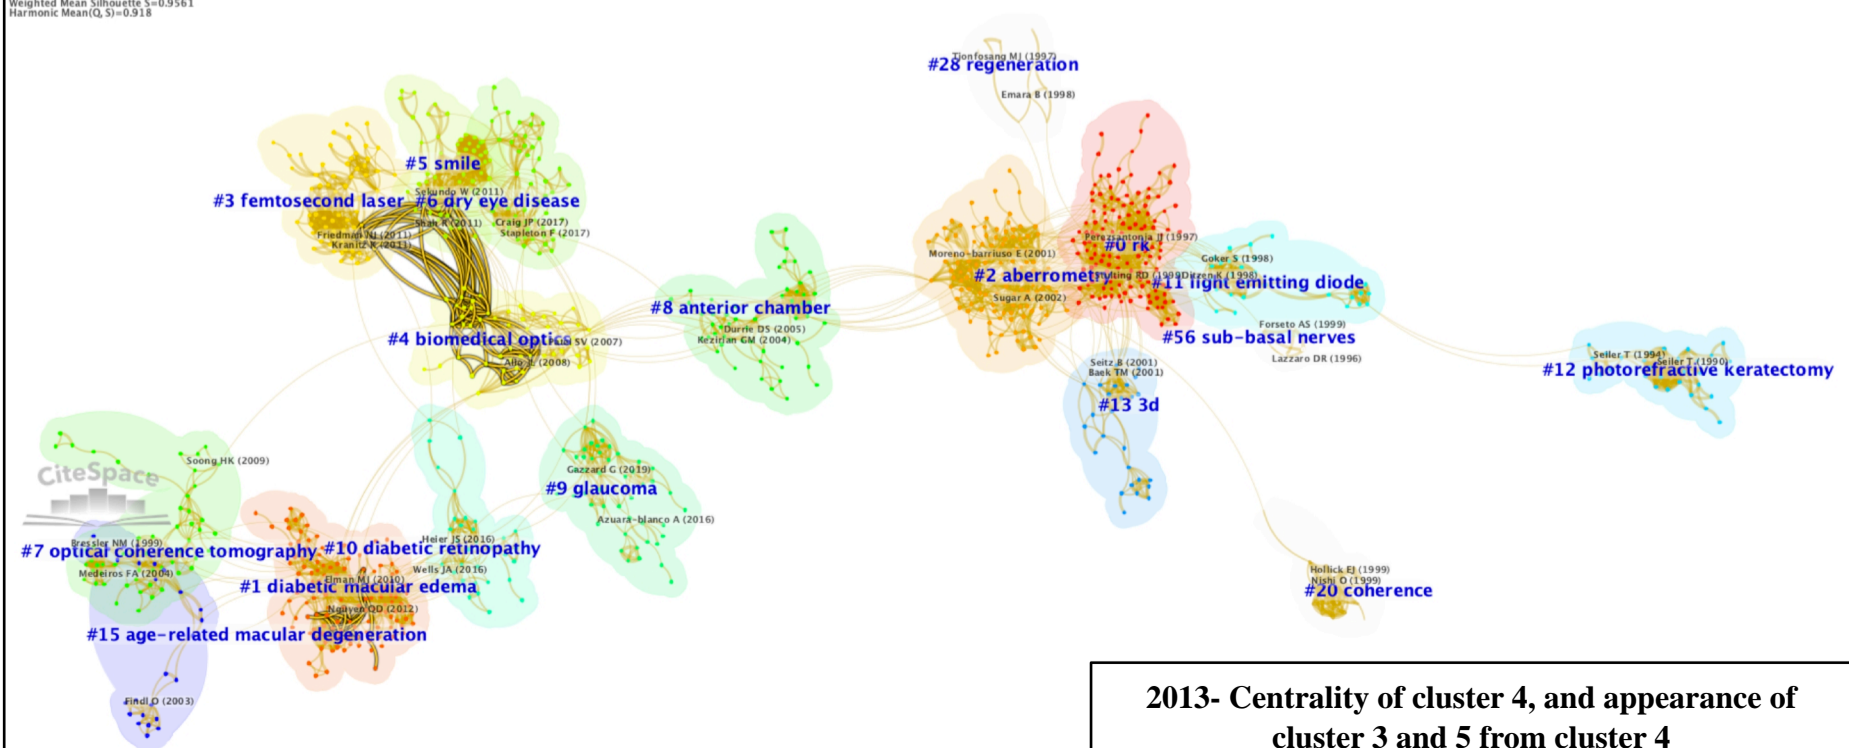



CiteSpace, v. 6.1.R3 (64-bit) Advanced  
 October 22, 2022 at 2:03:42 PM CST  
 WOS: /Users/ellen/Desktop/laser/data  
 Timespan: 1990-2022 (Slice Length=1)  
 Selection Criteria: g-index (k=25), LRF=3.0, L/N=10, LBY=5, e=1.0  
 Network: N=1585, E=5696 (Density=0.0045)  
 Largest CC: 1004 (63%)  
 Nodes Labeled: 1.0%  
 Pruning: None  
 Modularity Q=0.8828  
 Weighted Mean Silhouette S=0.9561  
 Harmonic Mean(Q, S)=0.918

g-index: 2.5, k=25, LRF=3.0, L/N=10, LBY=5, e=1.0  
 Selection Criteria: g-index (k=25), LRF=3.0, L/N=10, LBY=5, e=1.0

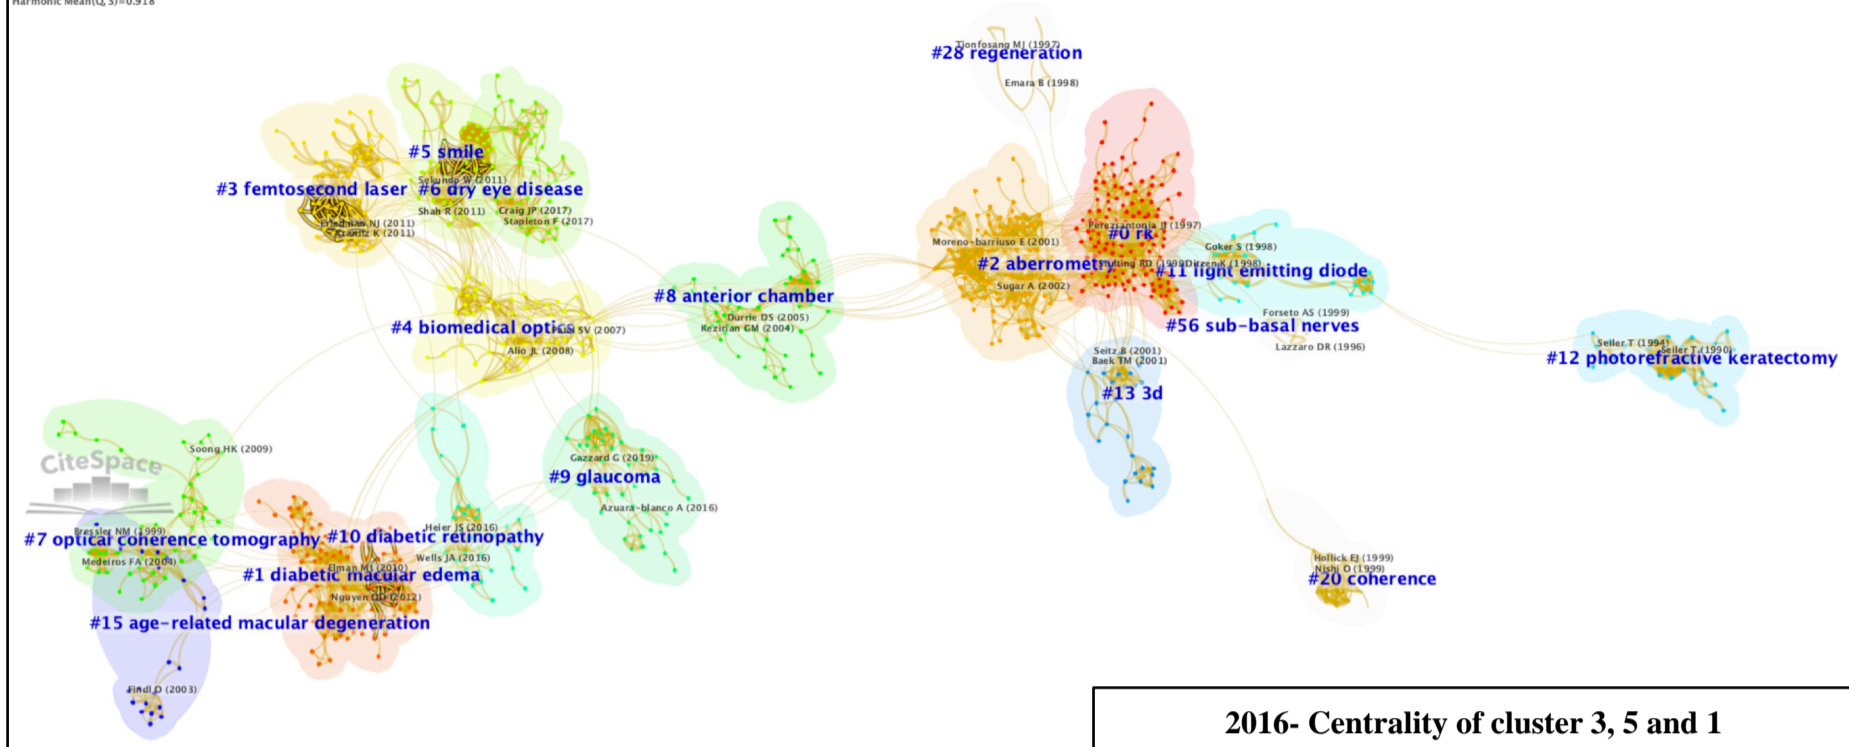

CiteSpace, v. 6.1.R3 (64-bit) Advanced  
 October 22, 2022 at 2:03:42 PM CST  
 WOS: /Users/ellen/Desktop/laser/data  
 Timespan: 1990-2022 (Slice Length=1)  
 Selection Criteria: g-index (k=25), LRF=3.0, L/N=10, LBY=5, e=1.0  
 Network: N=1585, E=5696 (Density=0.0045)  
 Largest CC: 1004 (63%)  
 Nodes Labeled: 1.0%  
 Pruning: None  
 Modularity Q=0.8828  
 Weighted Mean Silhouette S=0.9561  
 Harmonic Mean(Q, S)=0.918

g-index: 2.5, k=25, LRF=3.0, L/N=10, LBY=5, e=1.0  
 Selection Criteria: g-index (k=25), LRF=3.0, L/N=10, LBY=5, e=1.0

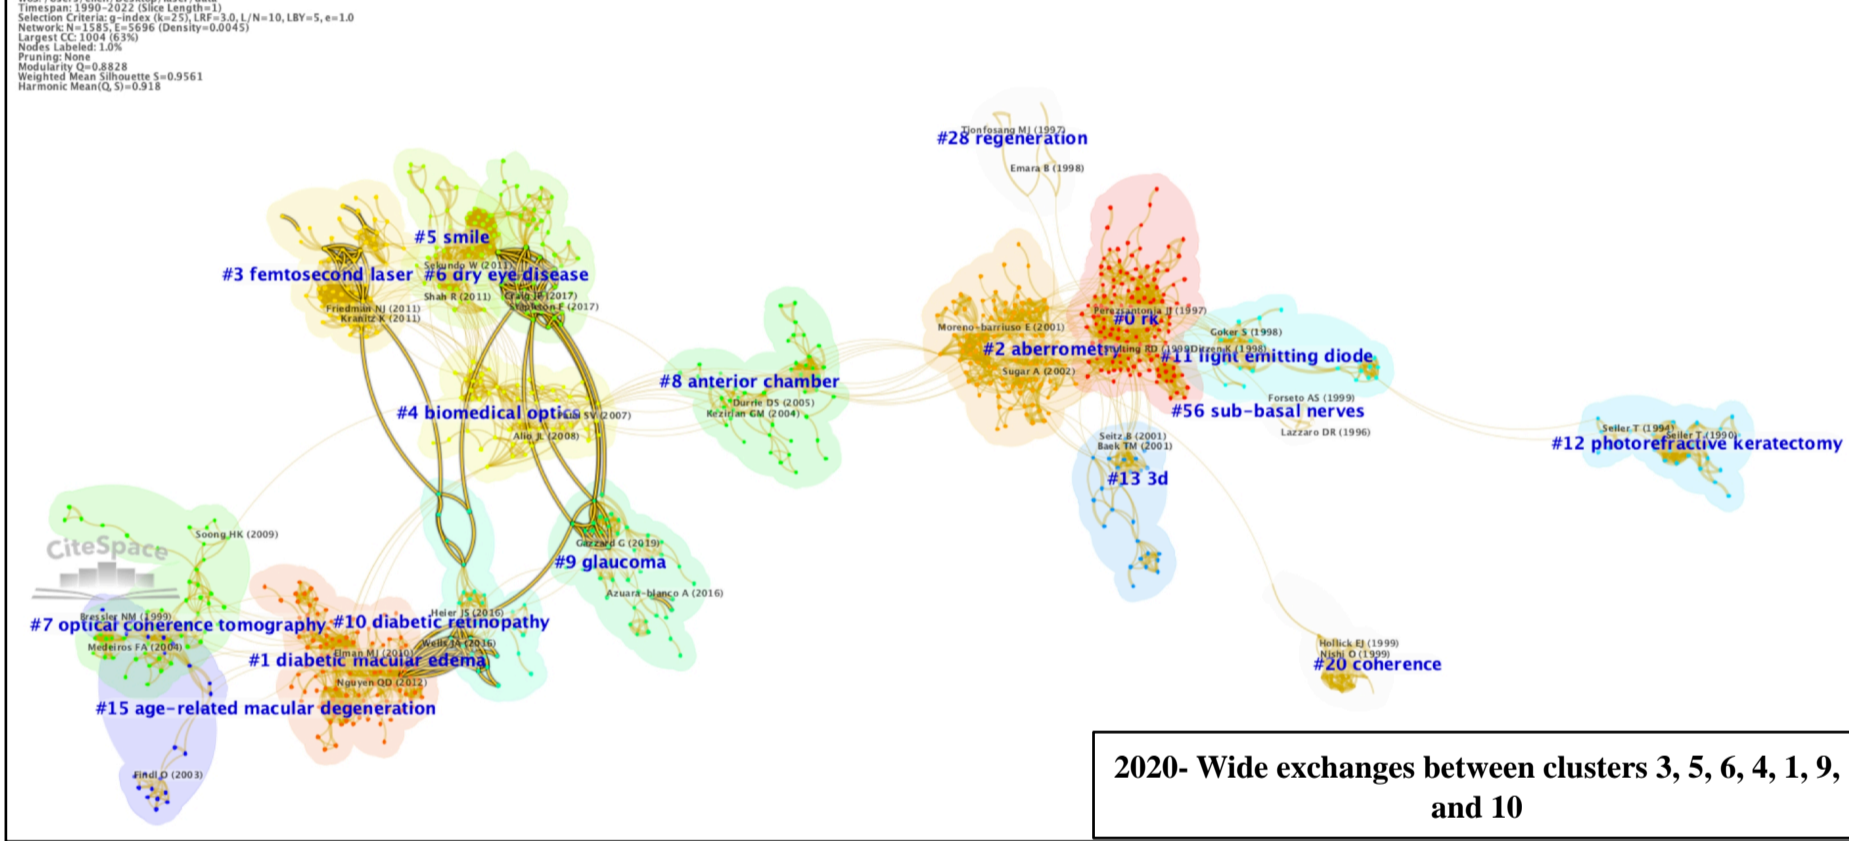

CiteSpace, v. 6.1.R3 (64-bit) Advanced  
 October 22, 2022 at 2:03:42 PM CST  
 WOS: /Users/ellen/Desktop/laser/data  
 Timespan: 1990-2022 (Slice Length=1)  
 Selection Criteria: g-index (k=25), LRF=3.0, L/N=10, LBY=5, e=1.0  
 Network: N=1585, E=5696 (Density=0.0045)  
 Largest CC: 1004 (63%)  
 Nodes Labeled: 1.0%  
 Pruning: None  
 Modularity Q=0.8828  
 Weighted Mean Silhouette S=0.9561  
 Harmonic Mean(Q, S)=0.918

g-index: 2.5, k=25, LRF=3.0, L/N=10, LBY=5, e=1.0  
 Selection Criteria: g-index (k=25), LRF=3.0, L/N=10, LBY=5, e=1.0

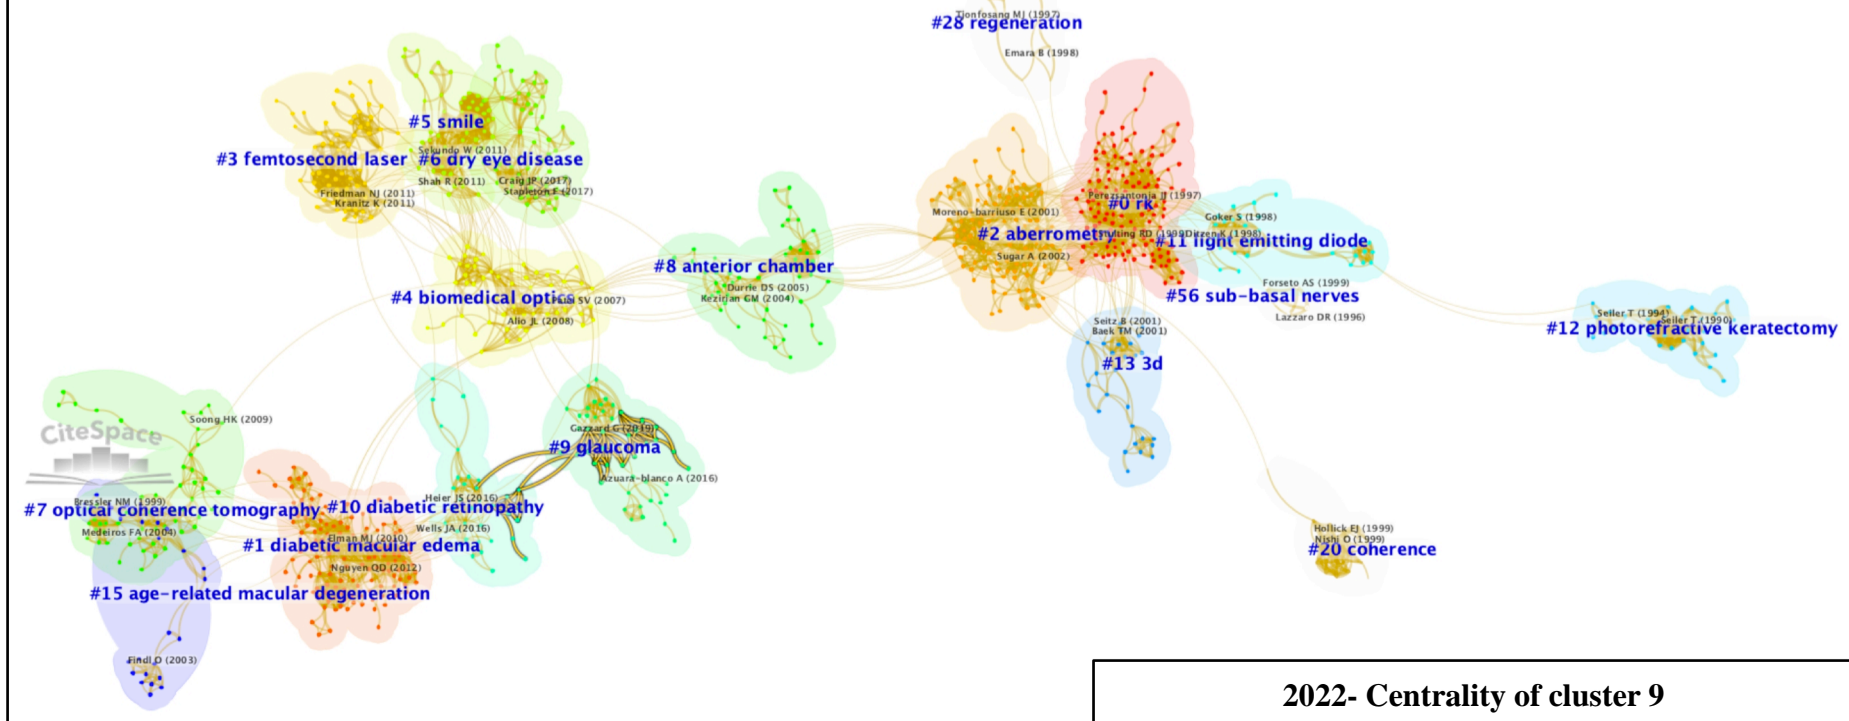

**Supplementary Fig. 4. Network of co-cited reference (A) with corresponding clusters (B) and timeline view (C) for the 2017-2022 time period.**



**A**

CiteSpace v. 6.1.R3 (64-bit) Advanced  
 October 23, 2022 at 10:34:37 AM CST  
 WoS: /Users/ellen/Desktop/laser/data  
 Timespan: 2017-2022 (Slice Length=1)  
 Selection Criteria: g-index (k=25), LRF=3.0, L/N=10, LBY=5, e=1.0  
 Network N=332, E=1168 (Density=0.0213)  
 Largest CC: 229 (68%)  
 Nodes Labeled: 1.0%  
 Pruning: None  
 Modularity Q=0.8091  
 Weighted Mean Silhouette S=0.9341  
 Harmonic Mean(Q,S)=0.8671

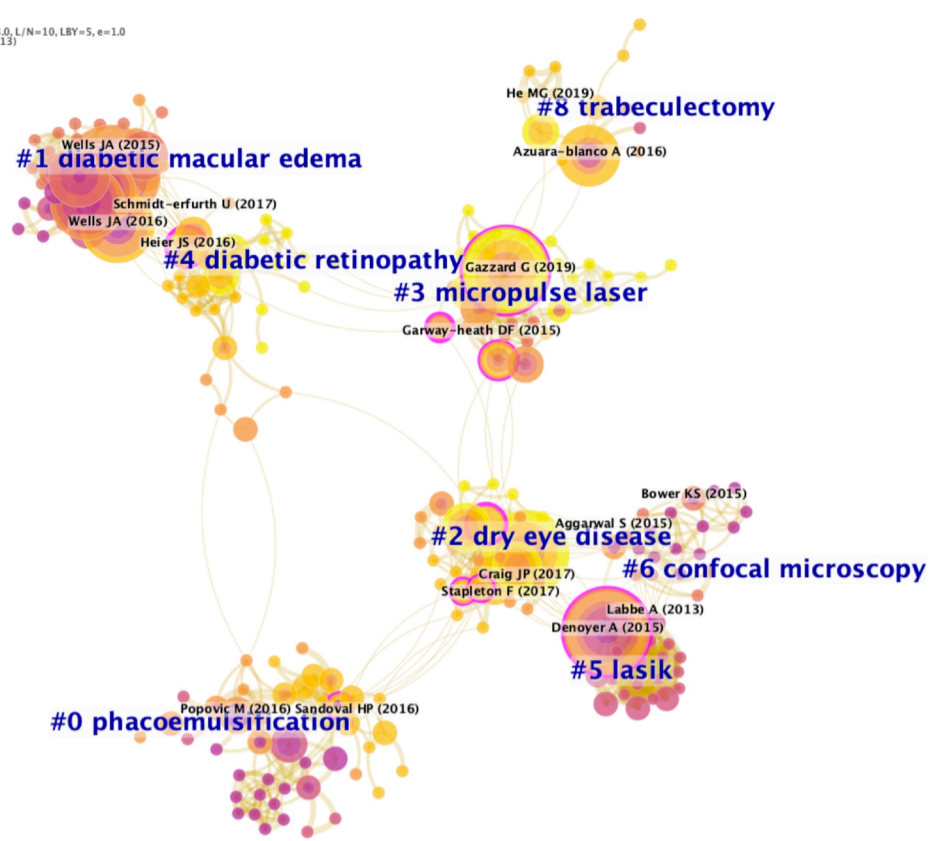**B**

CiteSpace v. 6.1.R3 (64-bit) Advanced  
 October 23, 2022 at 10:34:37 AM CST  
 WoS: /Users/ellen/Desktop/laser/data  
 Timespan: 2017-2022 (Slice Length=1)  
 Selection Criteria: g-index (k=25), LRF=3.0, L/N=10, LBY=5, e=1.0  
 Network N=332, E=1168 (Density=0.0213)  
 Largest CC: 229 (68%)  
 Nodes Labeled: 1.0%  
 Pruning: None  
 Modularity Q=0.8091  
 Weighted Mean Silhouette S=0.9341  
 Harmonic Mean(Q,S)=0.8671

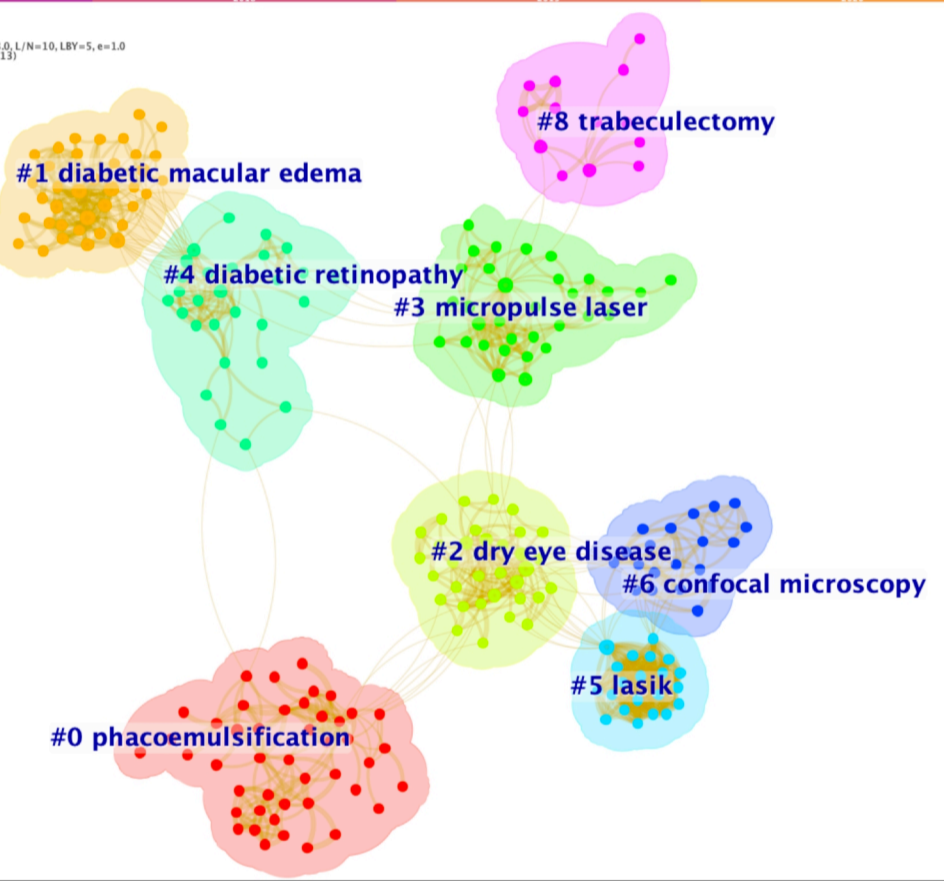**C**

CiteSpace v. 6.1.R3 (64-bit) Advanced  
 October 23, 2022 at 10:34:37 AM CST  
 WoS: /Users/ellen/Desktop/laser/data  
 Timespan: 2017-2022 (Slice Length=1)  
 Selection Criteria: g-index (k=25), LRF=3.0, L/N=10, LBY=5, e=1.0  
 Network N=332, E=1168 (Density=0.0213)  
 Largest CC: 229 (68%)  
 Nodes Labeled: 1.0%  
 Pruning: None  
 Modularity Q=0.8091  
 Weighted Mean Silhouette S=0.9341  
 Harmonic Mean(Q,S)=0.8671

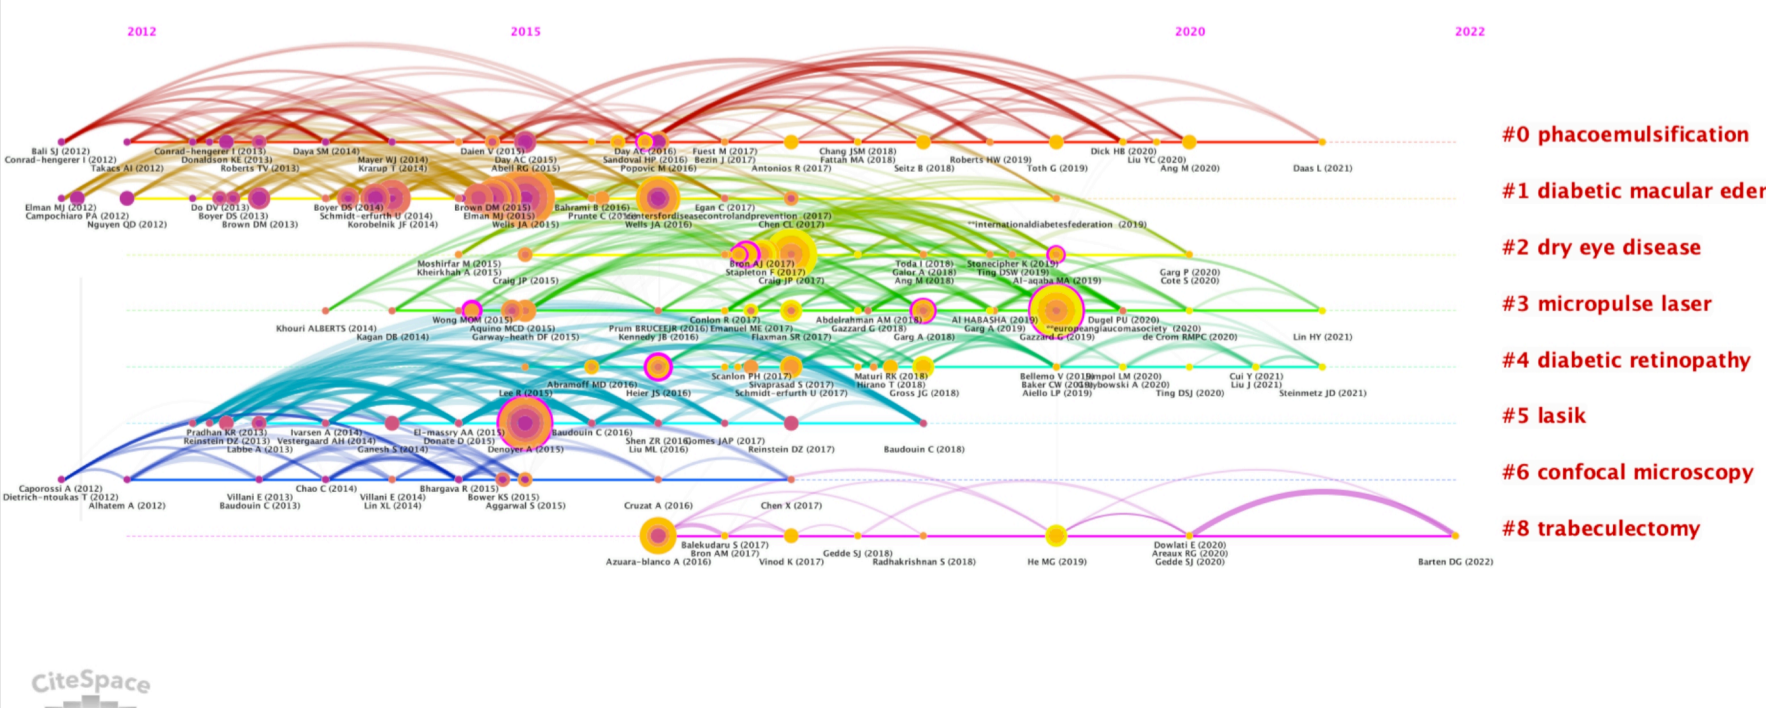

**Supplementary Fig. 5. Detail focus on all 8 extracted clusters of the co-citation reference networks ranked by burstness of citations for the time period 2017- 2022.**

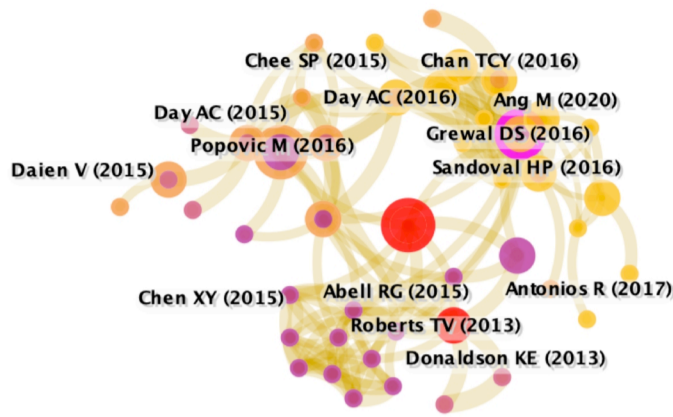

**Cluster 0- ‘phacoemulsification’:** phacoemulsification (13.24, 0.001); cataract surgery (8.77, 0.005); femtosecond laser-assisted cataract surgery (4.36, 0.05); posterior capsule rupture (4.36, 0.05); femtosecond laser-assisted cataract surgery (4.36, 0.05)

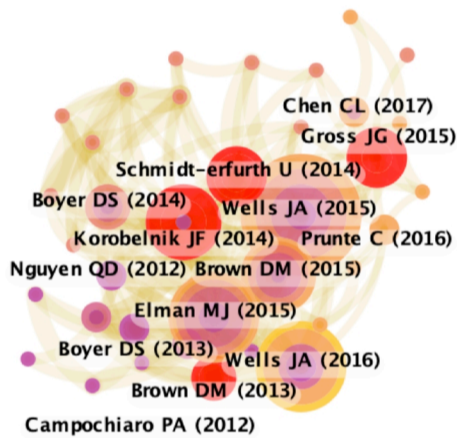

**Cluster 1- ‘diabetic macular edema’:** diabetic macular edema (13.01, 0.001); ranibizumab (8.15, 0.005); clinical trials (4.66, 0.05); anti-vegf (4.66, 0.05); vascular endothelial growth factor inhibitors (4.08, 0.05)

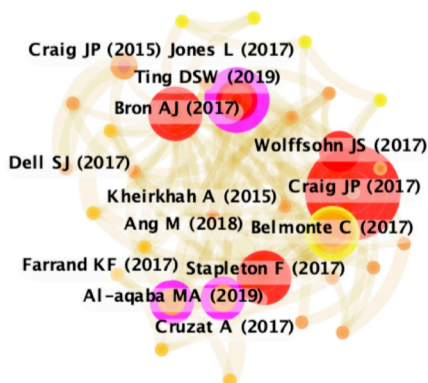

**Cluster 2- ‘dry eye disease’:** dry eye disease (12.54, 0.001); meibomian gland dysfunction (10.14, 0.005); diabetic retinopathy (5.47, 0.05); intense pulsed light (5.04, 0.05); ocular surface disease (5.04, 0.05)

2017  
 CiteSpace, v. 5.1.R3 (64-bit) Advanced  
 October 23, 2022 at 10:34:37 AM CST  
 WoS: /Users/ellen/Desktop/laser/data  
 Timespan: 2017~2022 (Slice Length=1)  
 Selection Criteria: g-index (k=25), LRF=3.0, L/N=10, LBY=5, e=1.0  
 Network: N=332, E=1168 (Density=0.0213)  
 Largest CC: 229 (68%)  
 Nodes Labeled: 1.0%  
 Pruning: None  
 Modularity Q=0.8091  
 Weighted Mean Silhouette S=0.9341  
 Harmonic Mean(Q, S)=0.8671

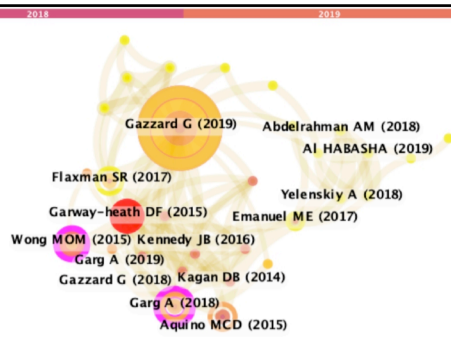

**Cluster 3- ‘micropulse laser’:** micropulse laser (9.43, 0.005); glaucoma (5.44, 0.05); inflammatory cascade (4.68, 0.05); antiangiogenic agents (4.68, 0.05); transscleral diode cyclophotocoagulation (4.68, 0.05)

CiteSpace

2017  
 CiteSpace, v. 5.1.R3 (64-bit) Advanced  
 October 23, 2022 at 10:34:37 AM CST  
 WoS: /Users/ellen/Desktop/laser/data  
 Timespan: 2017~2022 (Slice Length=1)  
 Selection Criteria: g-index (k=25), LRF=3.0, L/N=10, LBY=5, e=1.0  
 Network: N=332, E=1168 (Density=0.0213)  
 Largest CC: 229 (68%)  
 Nodes Labeled: 1.0%  
 Pruning: None  
 Modularity Q=0.8091  
 Weighted Mean Silhouette S=0.9341  
 Harmonic Mean(Q, S)=0.8671

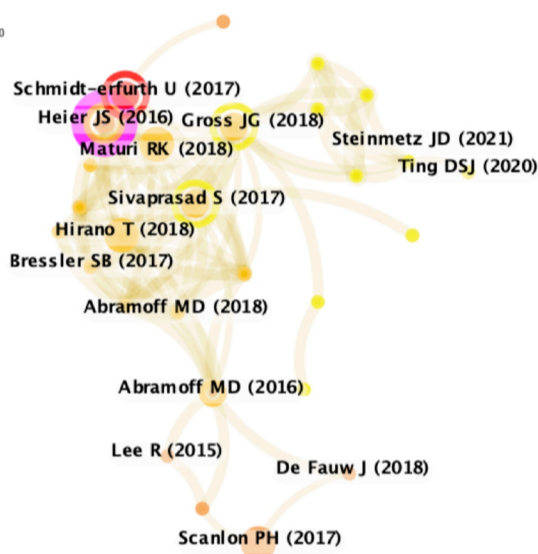

**Cluster 4- ‘diabetic retinopathy’:** diabetic retinopathy (12.12, 0.001); screening (8.65, 0.005); diabetic eye disease (8.65, 0.005); deep learning (8.65, 0.005); artificial intelligence (4.3, 0.05)

pace

2017  
 CiteSpace, v. 5.1.R3 (64-bit) Advanced  
 October 23, 2022 at 10:34:37 AM CST  
 WoS: /Users/ellen/Desktop/laser/data  
 Timespan: 2017~2022 (Slice Length=1)  
 Selection Criteria: g-index (k=25), LRF=3.0, L/N=10, LBY=5, e=1.0  
 Network: N=332, E=1168 (Density=0.0213)  
 Largest CC: 229 (68%)  
 Nodes Labeled: 1.0%  
 Pruning: None  
 Modularity Q=0.8091  
 Weighted Mean Silhouette S=0.9341  
 Harmonic Mean(Q, S)=0.8671

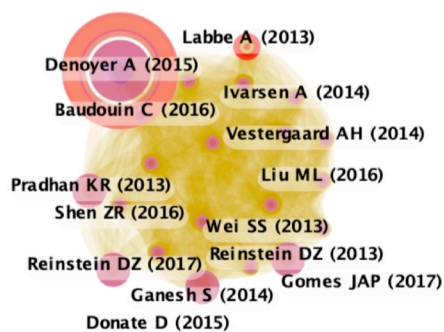

**Cluster 5- ‘lasik’:** lasik (11.2, 0.001); smile (11.2, 0.001); cornea (5.9, 0.05); corneenne (5.55, 0.05); corneal biomechanics (5.55, 0.05)

CiteSpace



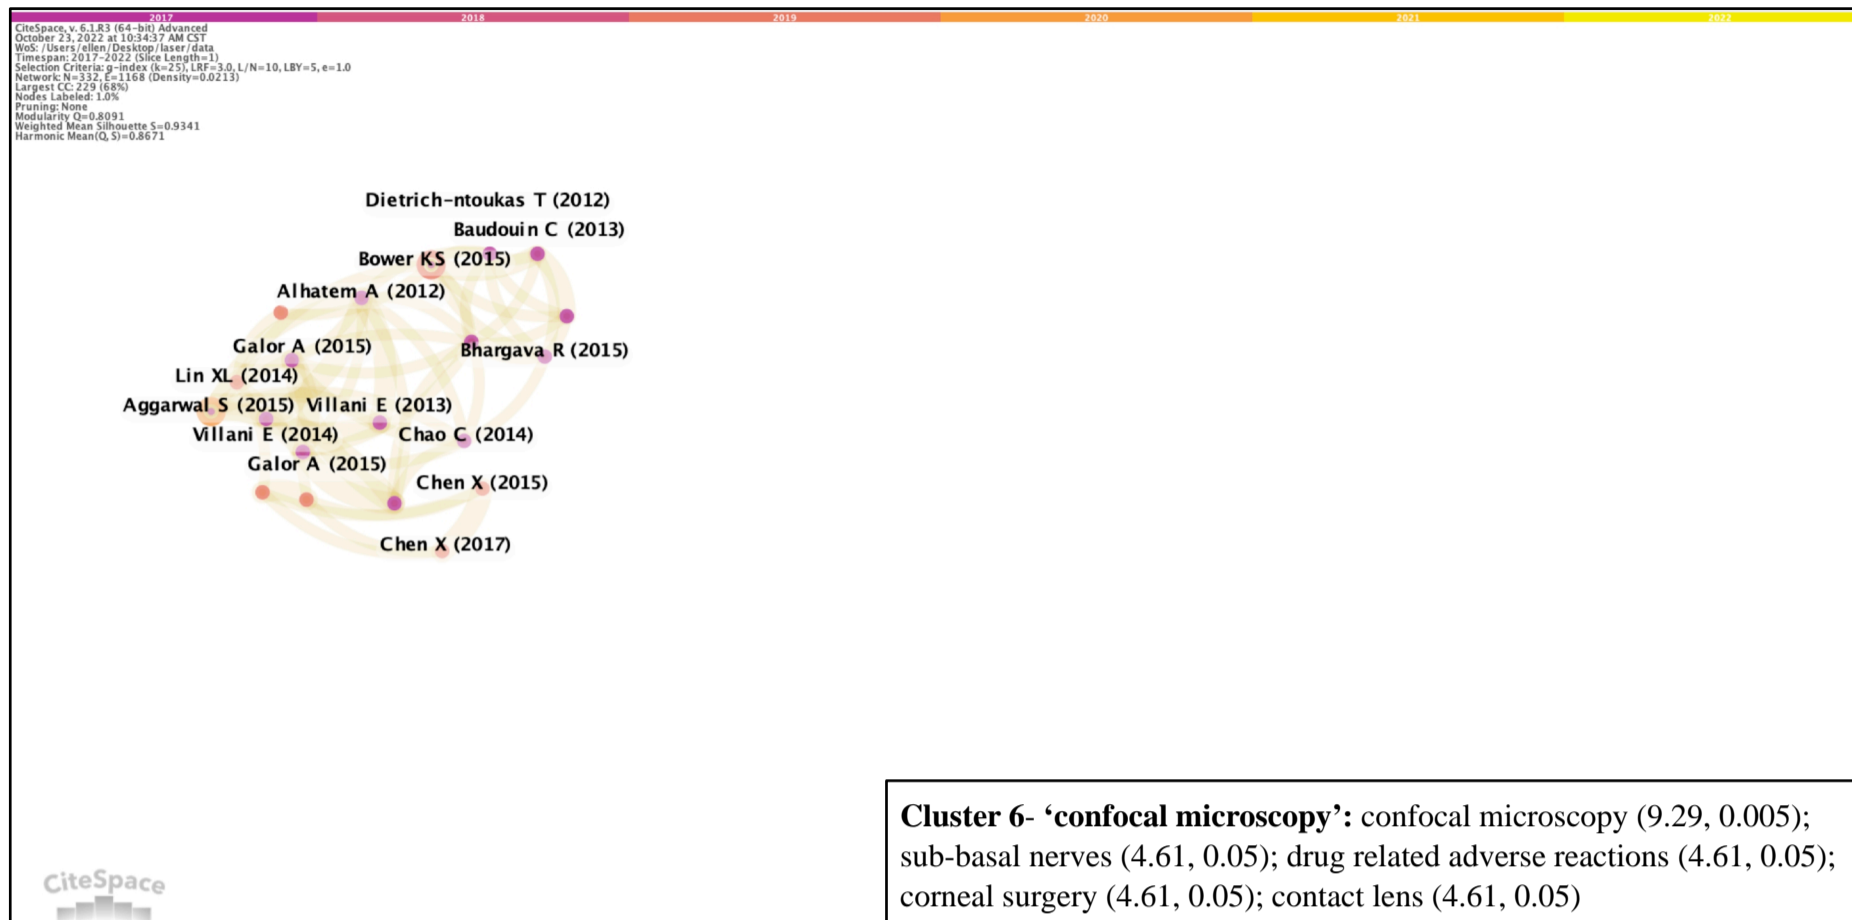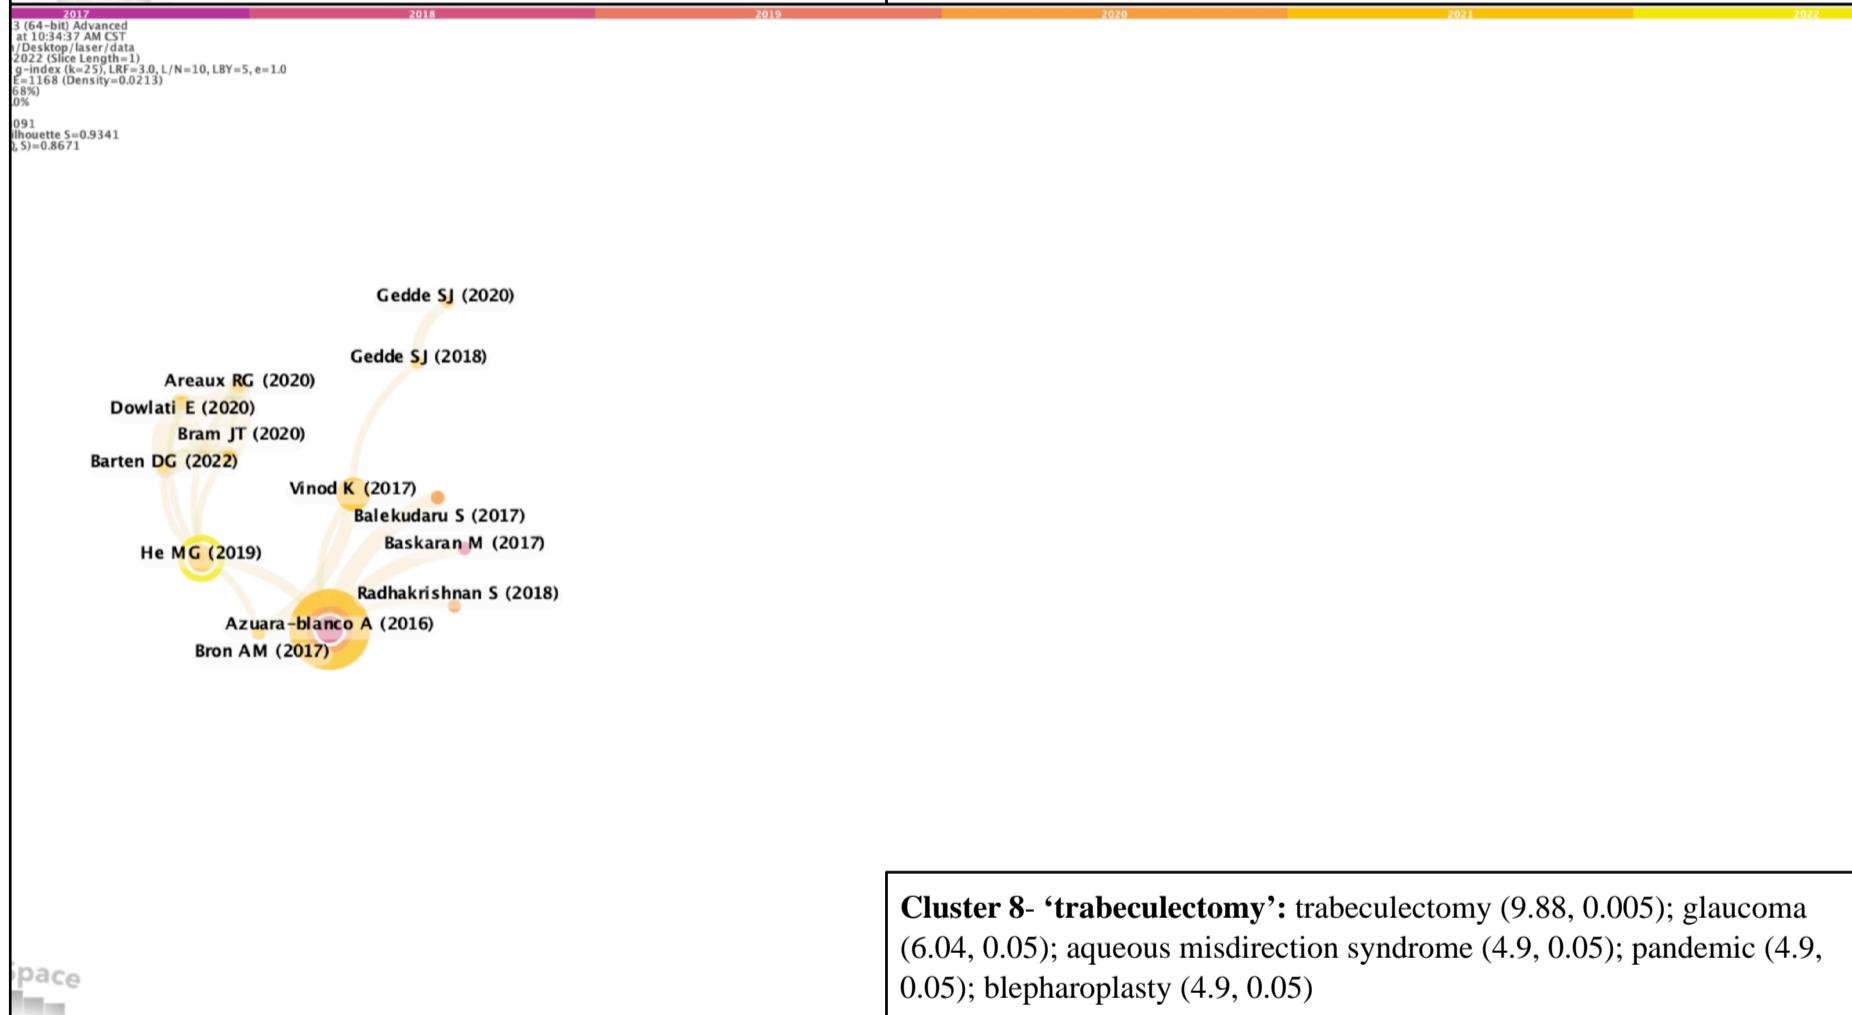

**Supplementary Fig. 6. Trend analysis of top 34 co-occurring authors' keywords from 1990 to 2022 (A), overlay visualization of co-occurring authors' keywords (B), and scored on the average publication year (C).**

Note: 360 items are represented within 4 clusters. The nodes represent keywords and the colors show the average year of publication for each node. The size of a node is proportional to the frequency of keyword co-occurrence.

The co-occurrence network is weighted on total link strength across different keyword nodes, and scored on the average publication years from 1990 to 2022.



**Supplementary Fig. 7. Annual scientific production (A) and average citation per year for references (B) (1990-2022)**



**A**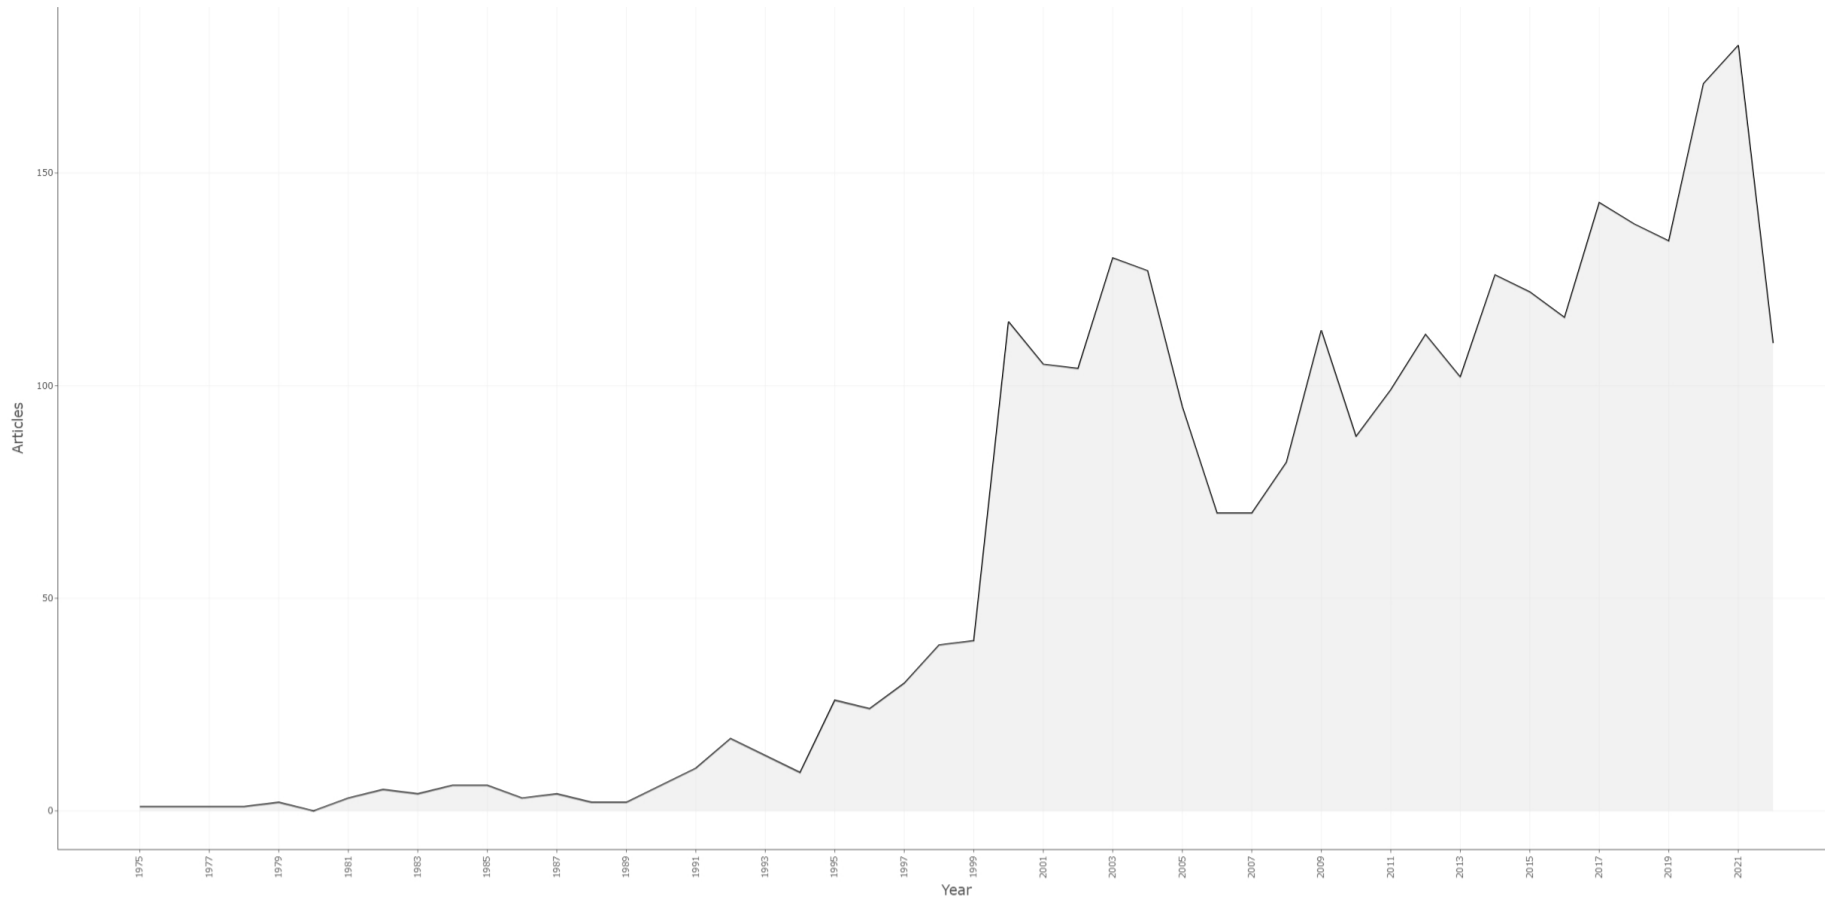**B**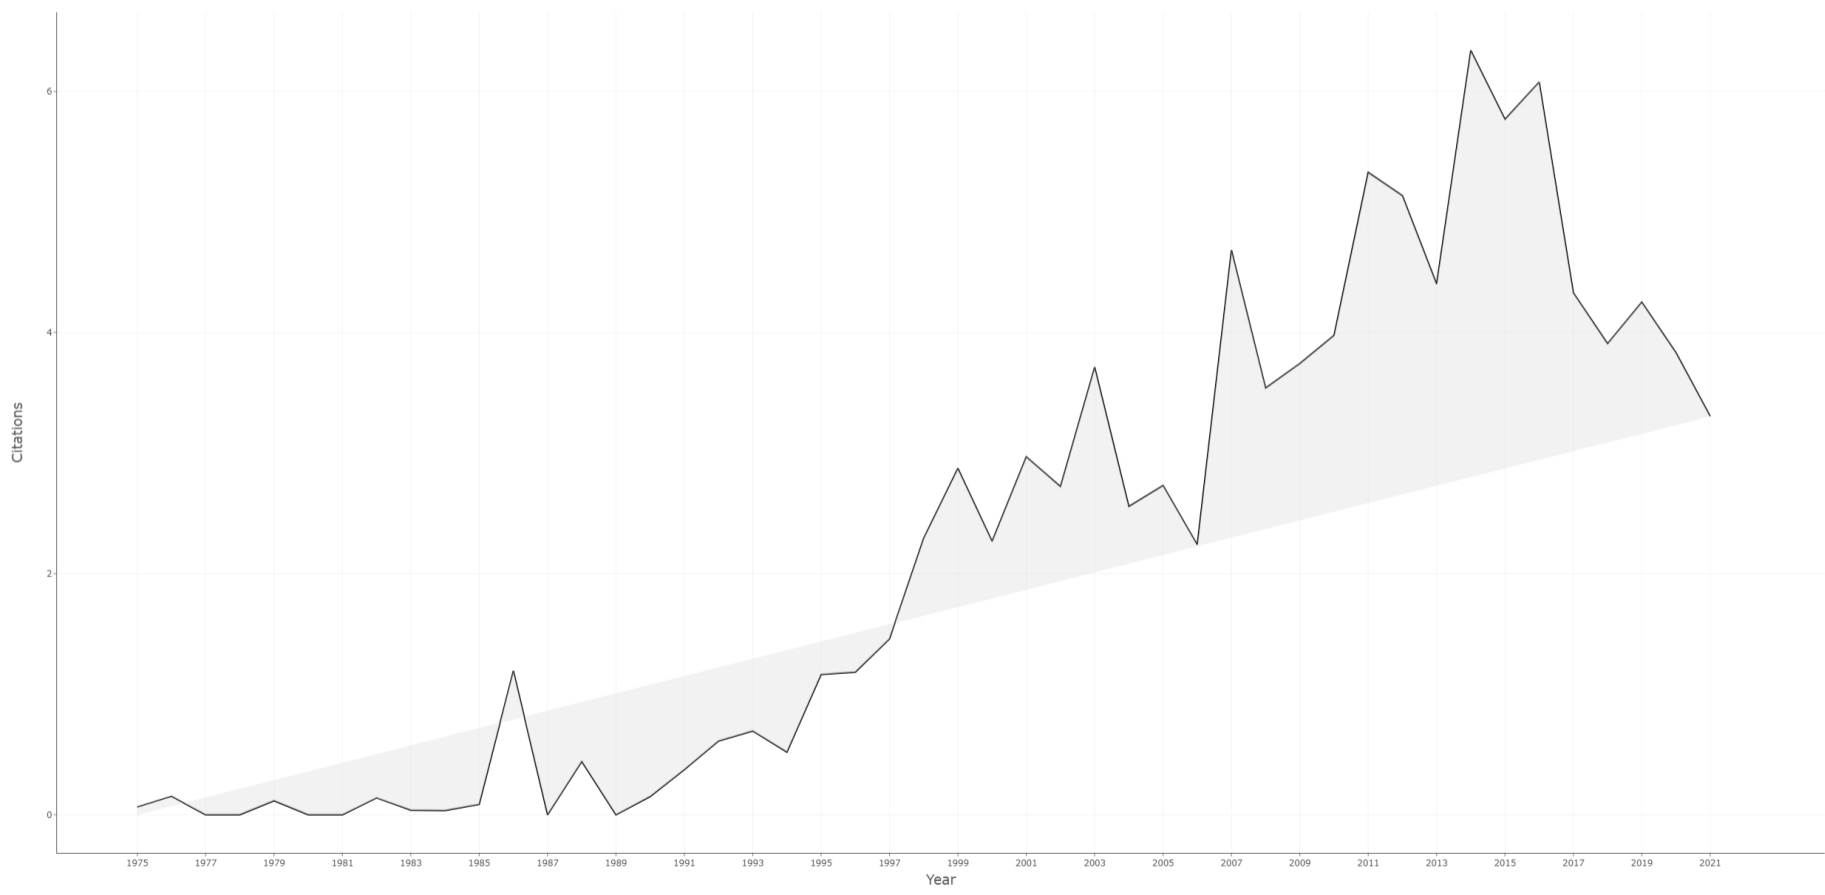

**Supplementary Fig. 8. Top 10 growth source (1990-2022 and 2017-2022)**

**A**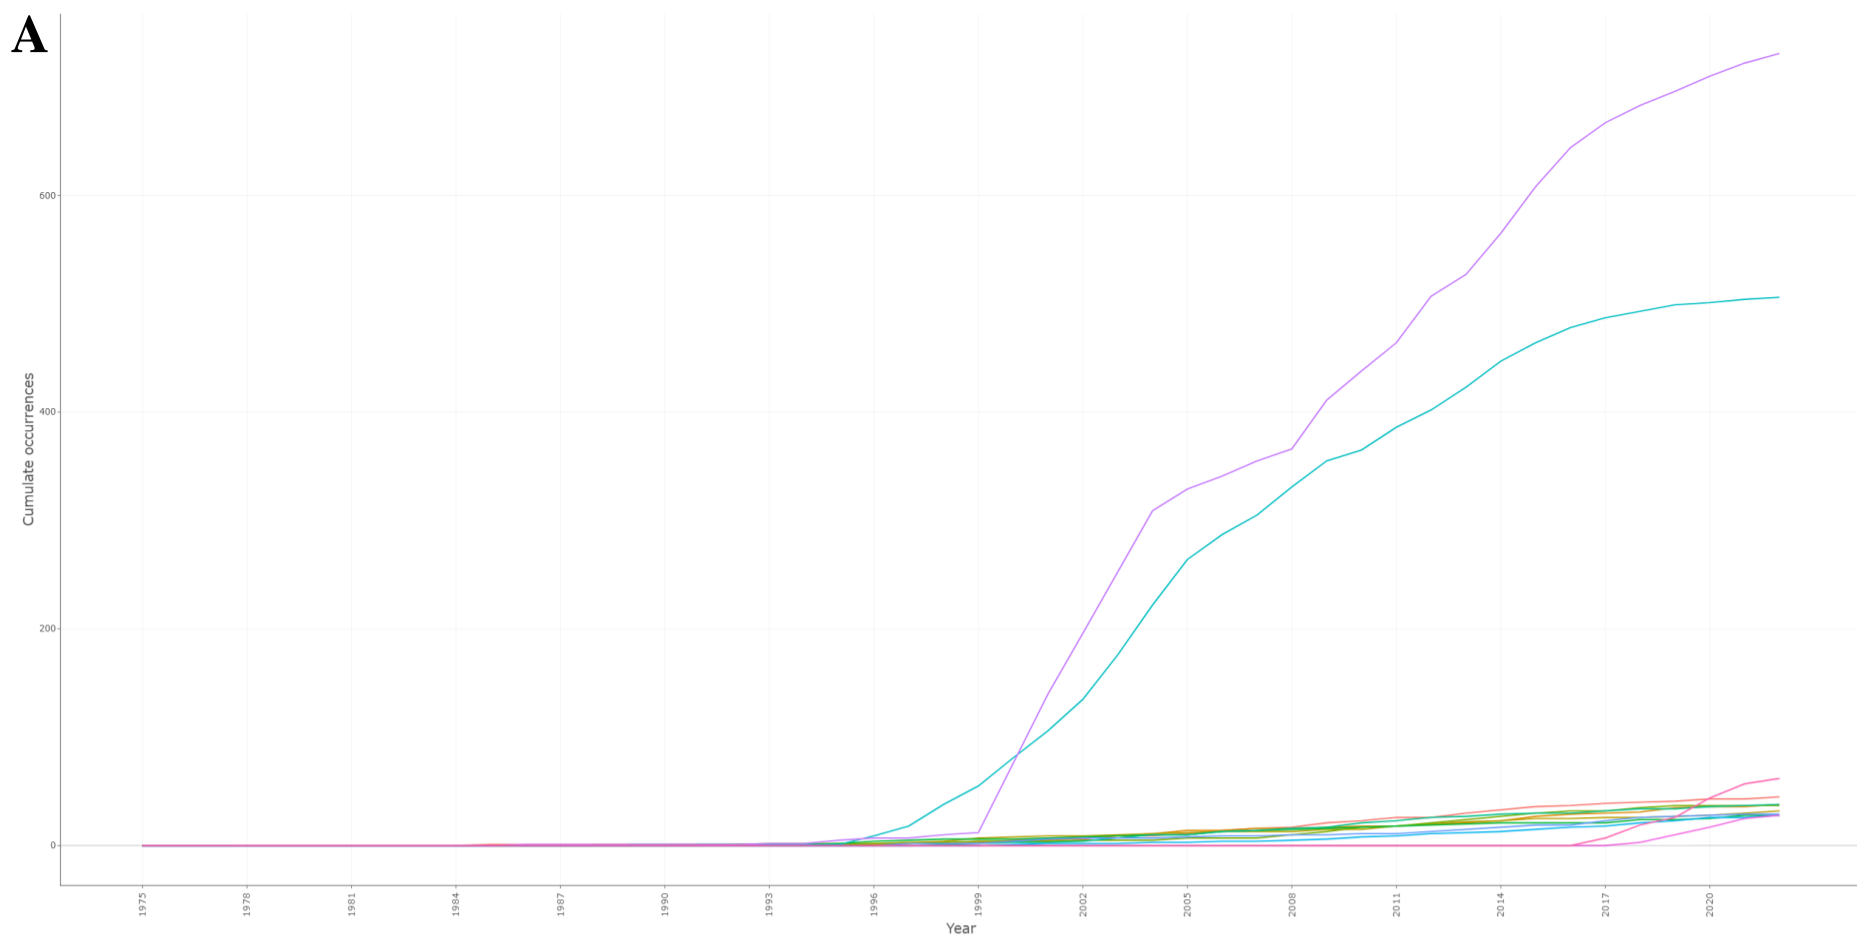

Source: AMERICAN JOURNAL OF OPHTHALMOLOGY BRITISH JOURNAL OF OPHTHALMOLOGY EYE INVESTIGATIVE OPHTHALMOLOGY & VISUAL SCIENCE JOURNAL FRANCAIS D OPHTHALMOLOGIE JOURNAL OF BIOMEDICAL OPTICS JOURNAL OF CATARACT AND REFRACTIVE SURGERY JOURNAL OF GLAUCOMA OPTHALMOLOGIE OPTHALMOLOGY OPTHALMOLOGY GLAUCOMA OPTHALMOLOGY RETINA

**B**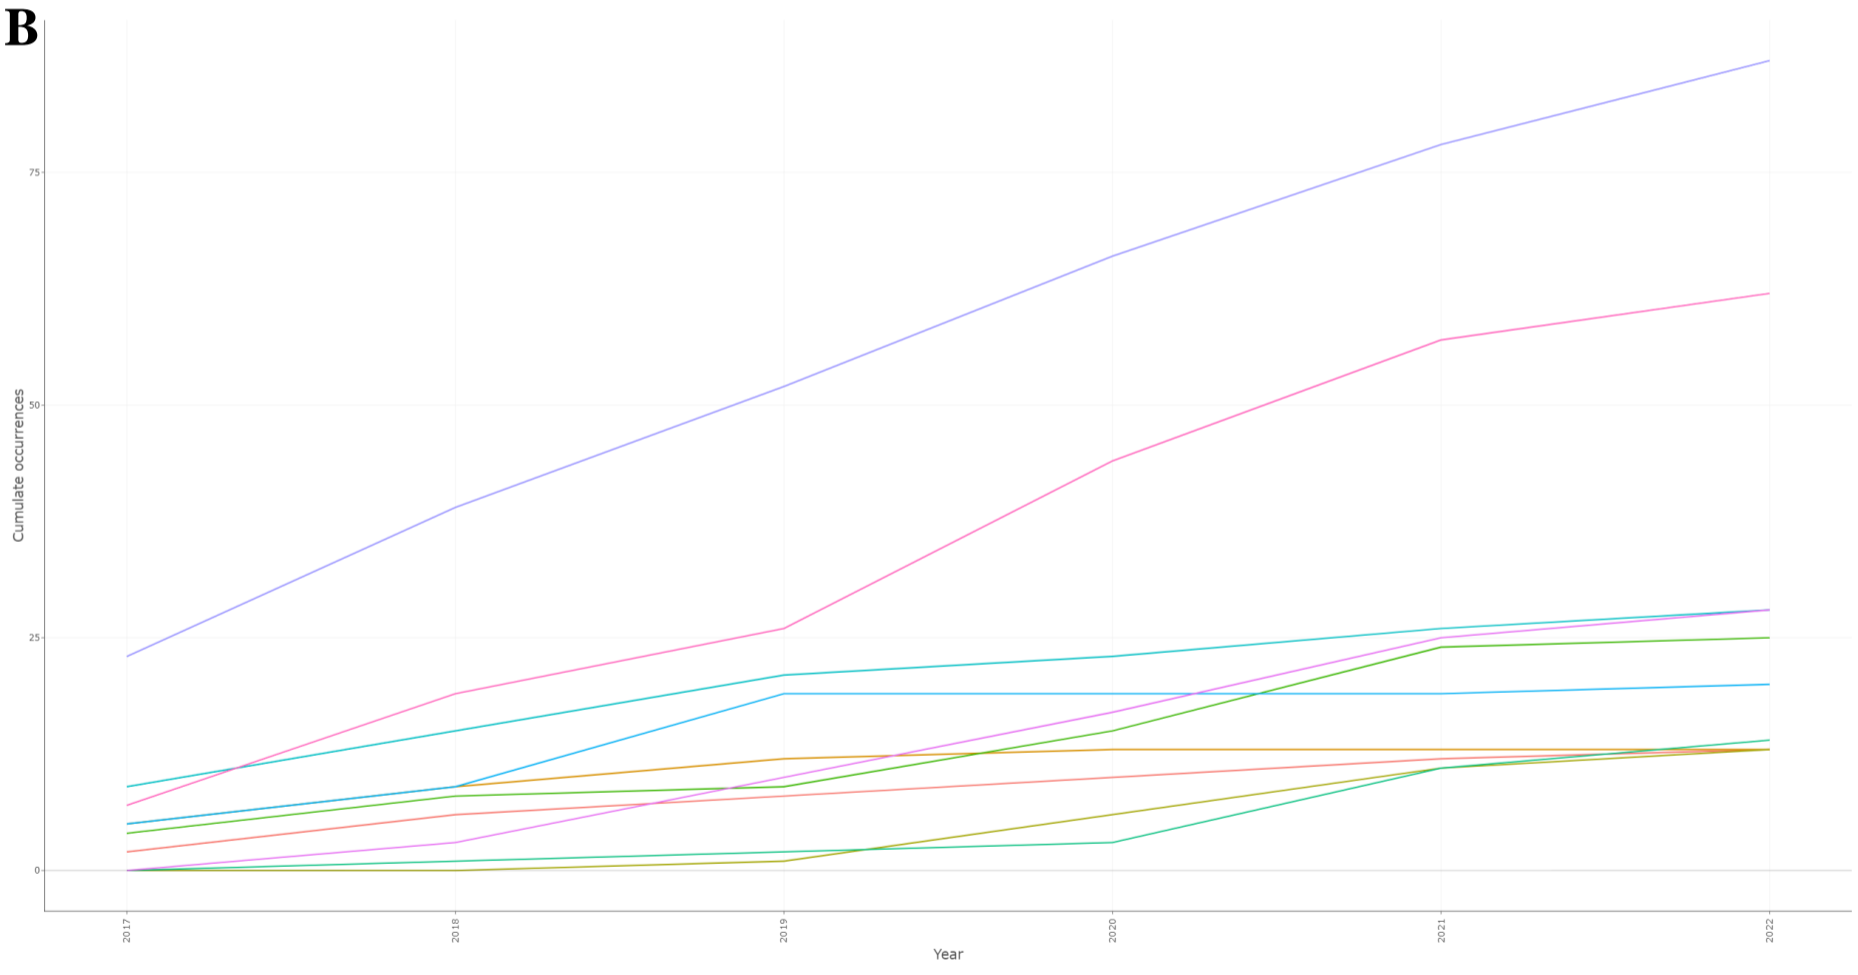

Source: ACTA OPHTHALMOLOGICA ADVANCES IN THERAPY BMJ CASE REPORTS CLINICAL OPHTHALMOLOGY EUROPEAN JOURNAL OF OPHTHALMOLOGY JOURNAL OF CATARACT AND REFRACTIVE SURGERY JOURNAL OF CURRENT OPHTHALMOLOGY OPTHALMOLOGY OPTHALMOLOGY GLAUCOMA OPTHALMOLOGY RETINA

**Supplementary Fig. 9. Overlay visualization of most cited journals for the last 5 years (A), and most co-cited journals which published the most articles in last 20 years (B).**

Figure A is obtained with CiteSpace and Figure B with VOSviewer.

(A) 9 clusters are identified.

(B) Weighted on documents, 365 journals with 6 clusters are identified.



A

2017 2018 2019 2020 2021 2022

CiteSpace, v. 5.1.R3 (64-bit) Advanced  
 October 23, 2022 at 6:33:56 PM CST  
 WoS: /Users/ellen/Desktop/laser/data  
 Timespan: 2017-2022 (Slice Length=1)  
 Selection Criteria: g-index (k=25), LRF=3.0, L/N=10, LBY=5, e=1.0  
 Network: N=565, E=3579 (Density=0.0225)  
 Largest CC: 533 (94%)  
 Nodes Labeled: 1.0%  
 Pruning: None  
 Modularity Q=0.52  
 Weighted Mean Silhouette S=0.8332  
 Harmonic Mean(Q, S)=0.6641

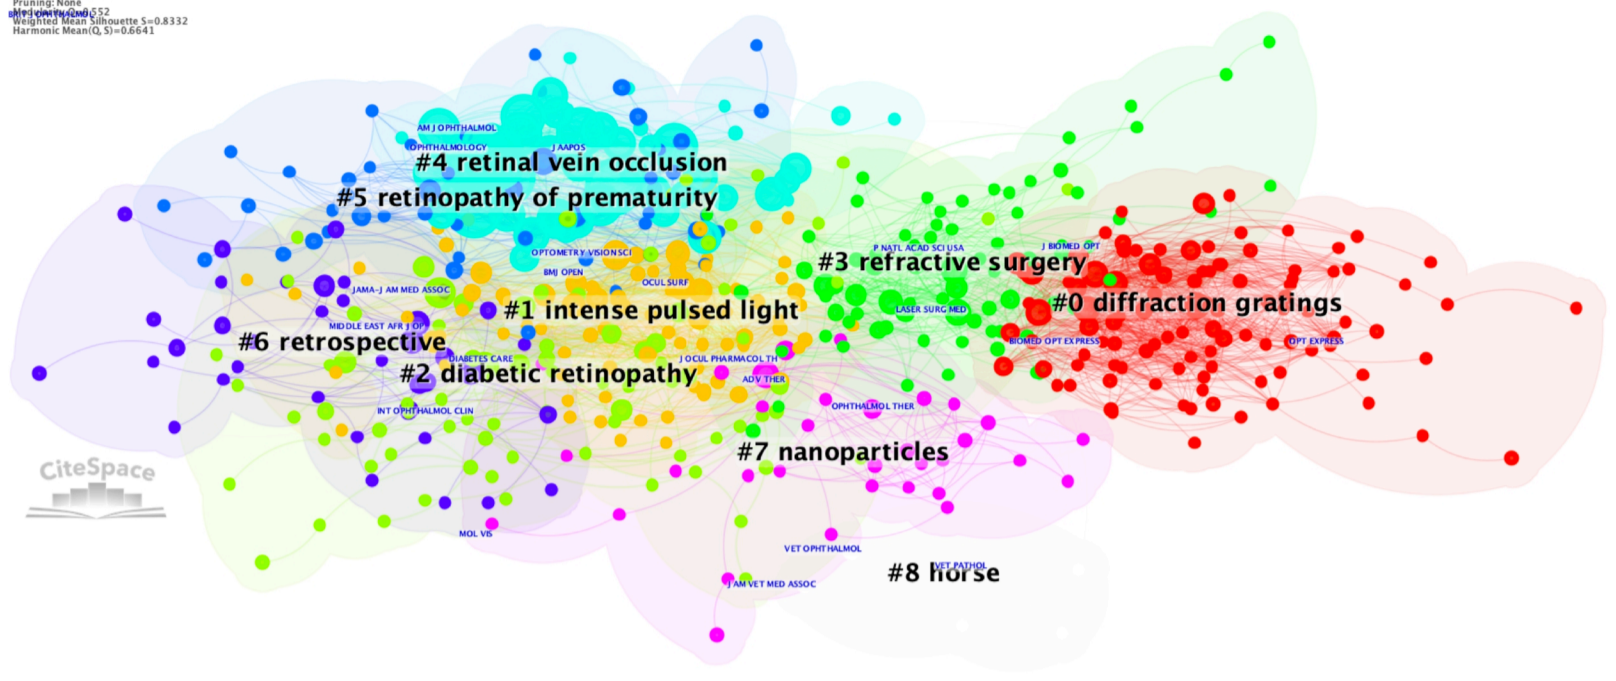

B

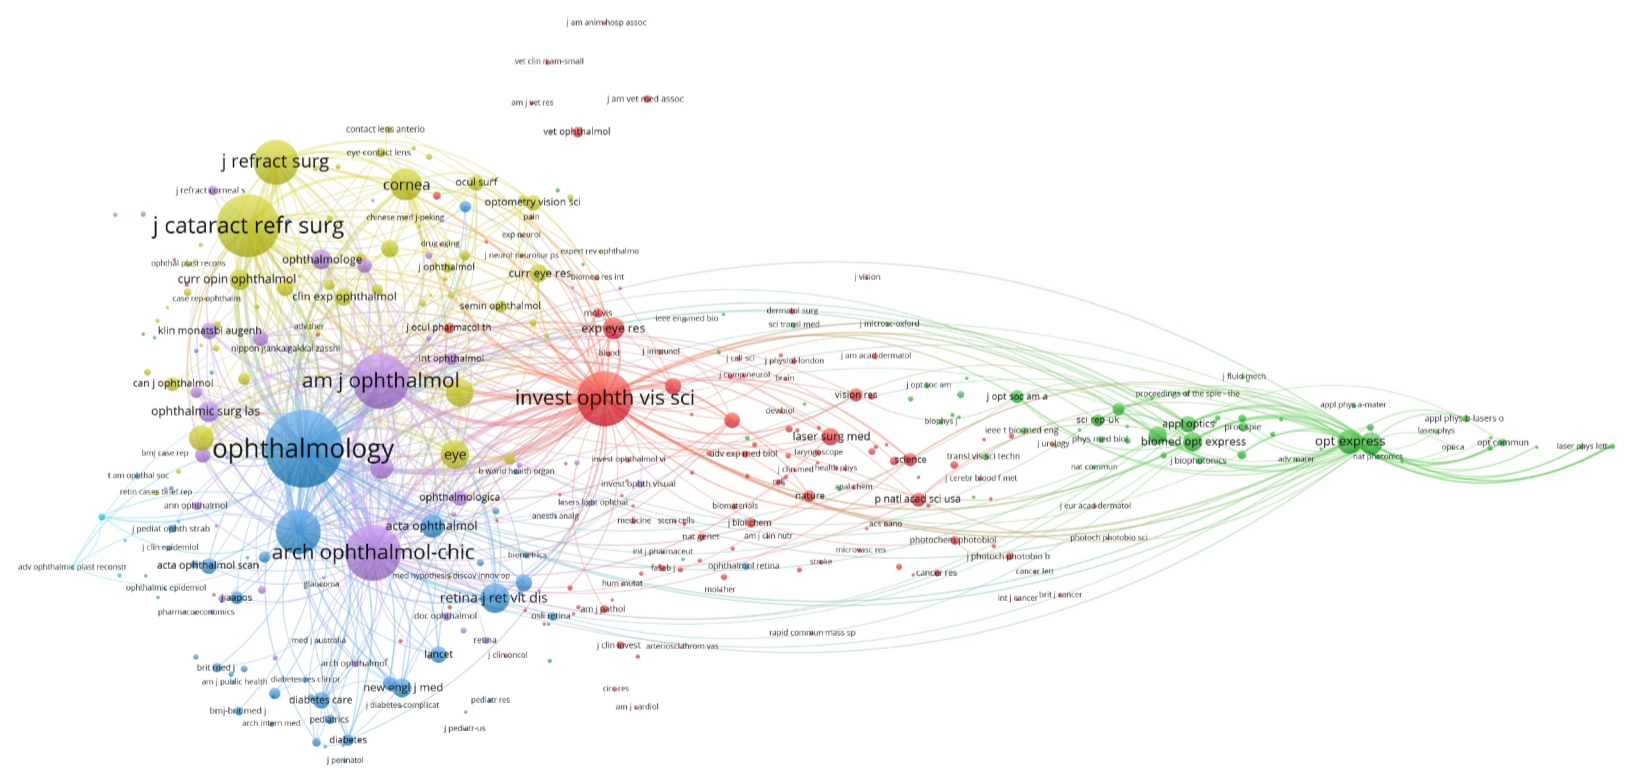

**Supplementary Fig. 10. Co-authorship network obtained with VOSviewer.**

69 clusters are identified comprising 396 different authors. Each cluster is identified with a different color.



**Supplementary Fig. 11. Visualization of the author co-citation network (A), with corresponding clusters (B) and time map (C) (2017-2022)**



**A**

CiteSpace, v. 6.1.R3 (64-bit) Advanced  
 October 23, 2022 at 5:29:09 PM CST  
 WoS: /Users/ellen/Desktop/laser/data  
 Timespan: 2017-2022 (Slice Length=1)  
 Selection Criteria: g-index (k=25), LRF=3.0, L/N=10, LBY=5, e=1.0  
 Network: N=414, E=1981 (Density=0.0232)  
 Largest CC: 354 (85%)  
 Nodes Labeled: 1.0%  
 Pruning: None  
 Modularity Q=0.7491  
 Weighted Mean Silhouette S=0.9238  
 Harmonic Mean(Q,S)=0.8273

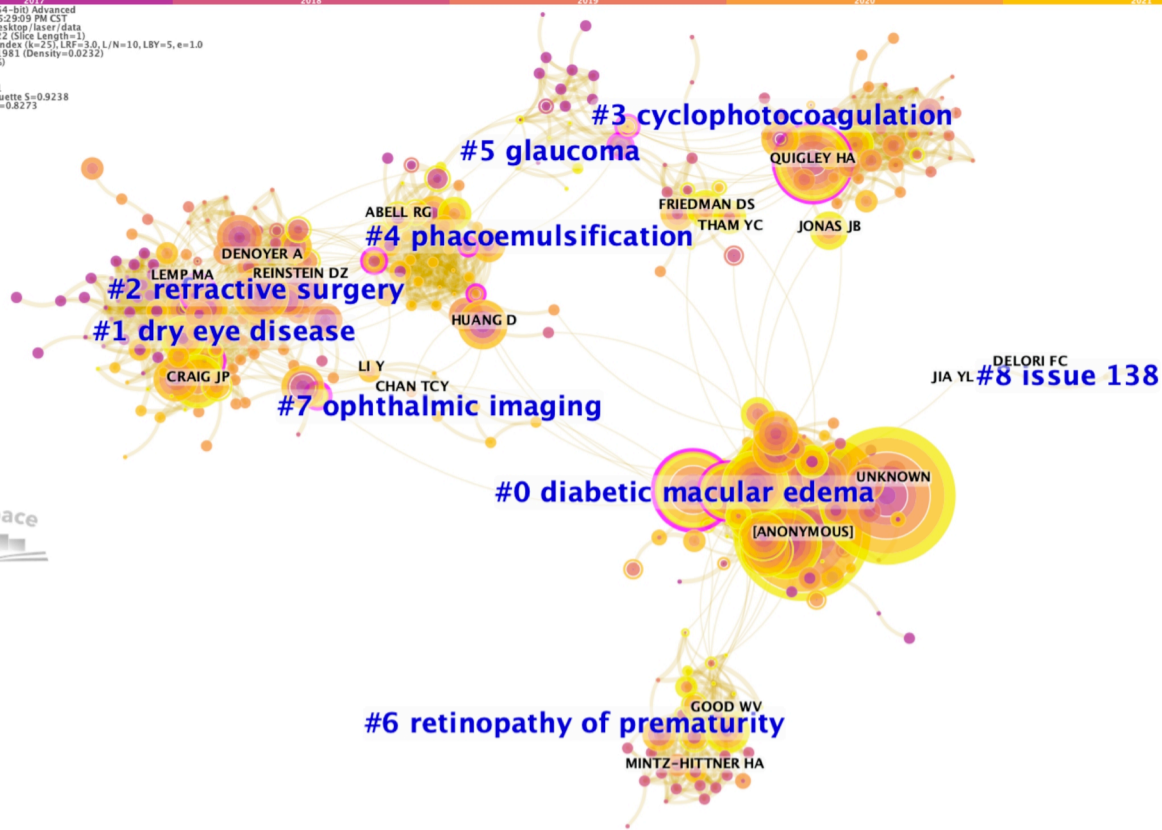**B**

CiteSpace, v. 6.1.R3 (64-bit) Advanced  
 October 23, 2022 at 5:29:09 PM CST  
 WoS: /Users/ellen/Desktop/laser/data  
 Timespan: 2017-2022 (Slice Length=1)  
 Selection Criteria: g-index (k=25), LRF=3.0, L/N=10, LBY=5, e=1.0  
 Network: N=414, E=1981 (Density=0.0232)  
 Largest CC: 354 (85%)  
 Nodes Labeled: 1.0%  
 Pruning: None  
 Modularity Q=0.7491  
 Weighted Mean Silhouette S=0.9238  
 Harmonic Mean(Q,S)=0.8273

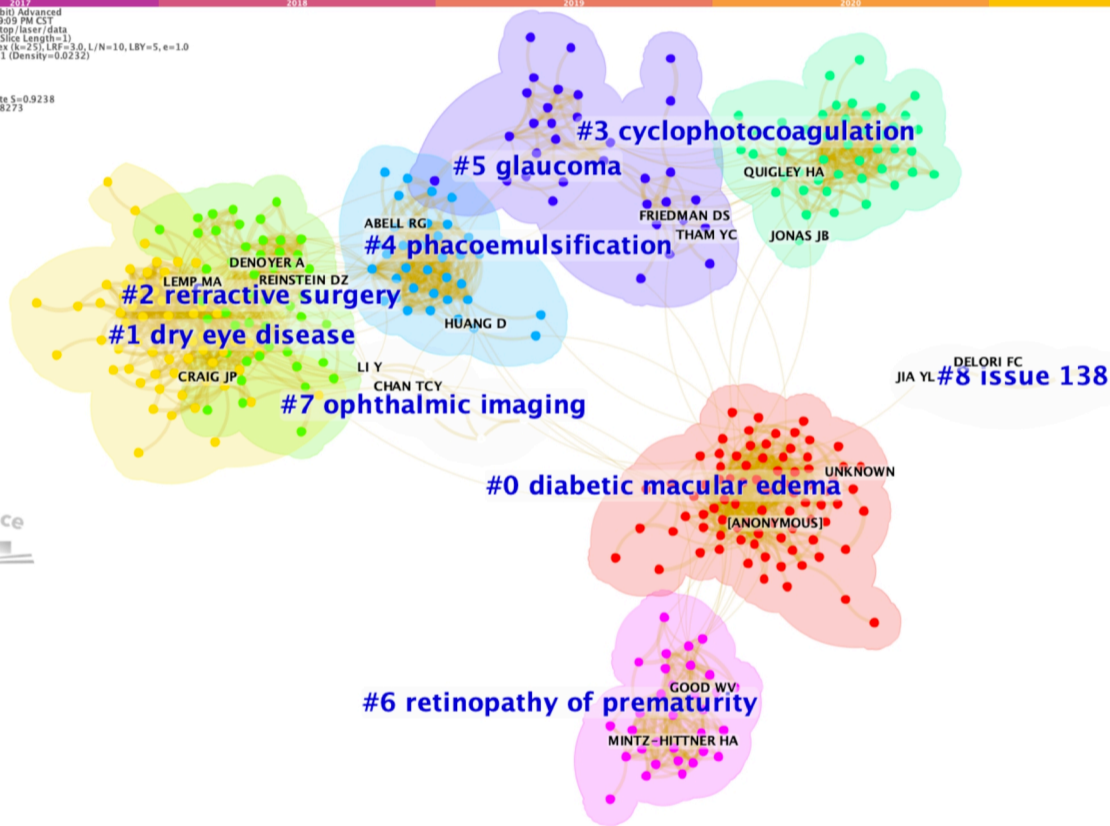**C**

CiteSpace, v. 6.1.R3 (64-bit) Advanced  
 October 23, 2022 at 5:29:09 PM CST  
 WoS: /Users/ellen/Desktop/laser/data  
 Timespan: 2017-2022 (Slice Length=1)  
 Selection Criteria: g-index (k=25), LRF=3.0, L/N=10, LBY=5, e=1.0  
 Network: N=414, E=1981 (Density=0.0232)  
 Largest CC: 354 (85%)  
 Nodes Labeled: 1.0%  
 Pruning: None  
 Modularity Q=0.7491  
 Weighted Mean Silhouette S=0.9238  
 Harmonic Mean(Q,S)=0.8273

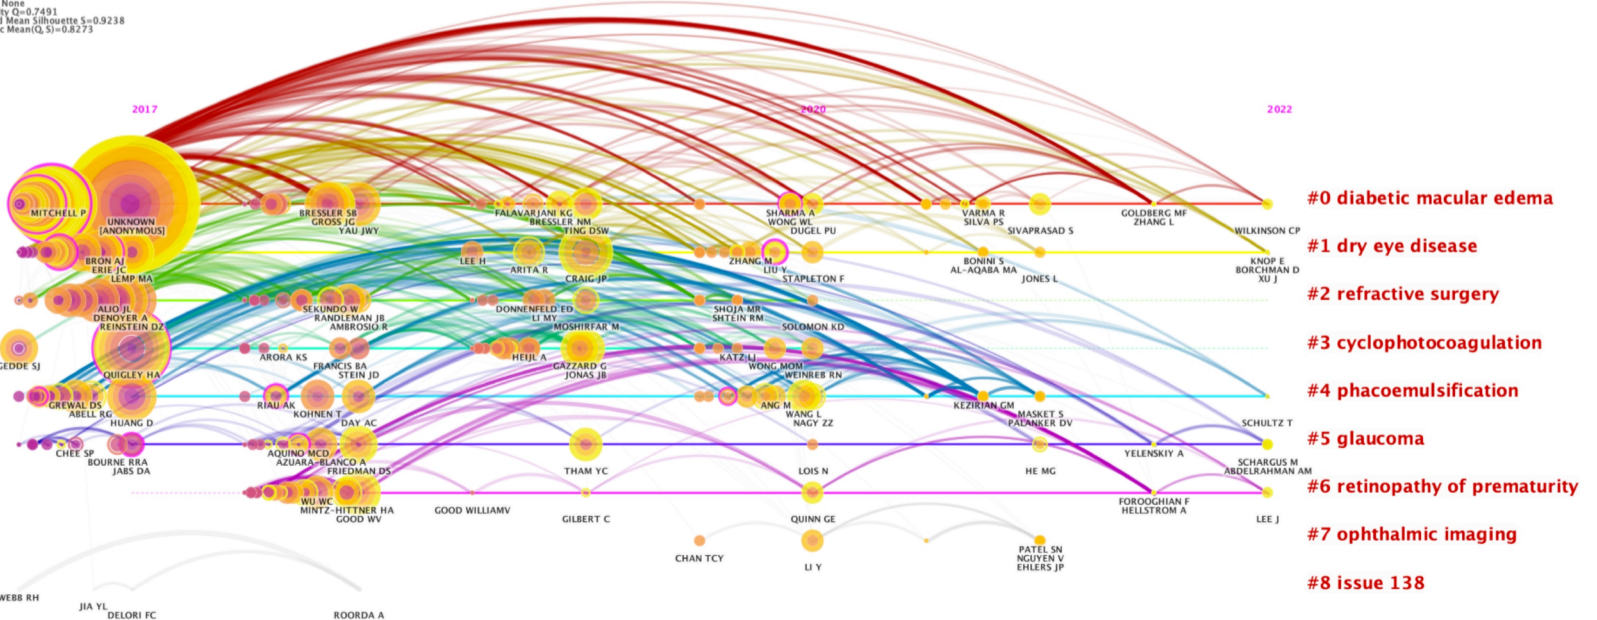**D**

CiteSpace, v. 6.1.R3 (64-bit) Advanced  
 October 23, 2022 at 5:29:09 PM CST  
 WoS: /Users/ellen/Desktop/laser/data  
 Timespan: 2017-2022 (Slice Length=1)  
 Selection Criteria: g-index (k=25), LRF=3.0, L/N=10, LBY=5, e=1.0  
 Network: N=414, E=1981 (Density=0.0232)  
 Largest CC: 354 (85%)  
 Nodes Labeled: 1.0%  
 Pruning: None  
 Modularity Q=0.7491  
 Weighted Mean Silhouette S=0.9238  
 Harmonic Mean(Q,S)=0.8273

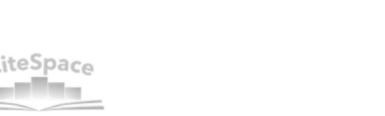

**Supplementary Table 1. Co-cited reference network detailed clusters (1990-2022)**

| Cluster ID | Size | Silhouette score | Mean (Year) | Top five extracted terms based on keywords (Log-likelihood ratio algorithm; p-level)                                                                                                                          | Representative reference                                                                                                                                                                                                                                                                  |
|------------|------|------------------|-------------|---------------------------------------------------------------------------------------------------------------------------------------------------------------------------------------------------------------|-------------------------------------------------------------------------------------------------------------------------------------------------------------------------------------------------------------------------------------------------------------------------------------------|
| 0          | 141  | 0.924            | 1997        | rk (8.02, 0.005); epikeratophakia (8.02, 0.005); nerves (8.02, 0.005); iscs (8.02, 0.005); inflammation (5.28, 0.05)                                                                                          | MJ, MALDONADO (2002.0) Undersurface ablation of the flap for laser in situ keratomileusis retreatment. OPTHALMOLOGY, V109, P12 DOI 10.1016/S0161-6420(02)01096-5                                                                                                                          |
| 1          | 134  | 0.967            | 2010        | diabetic macular edema (13.76, 0.001); ranibizumab (8.75, 0.005); retinal laser photocoagulation (8.64, 0.005); intravitreal therapy (8.64, 0.005); vitrectomy (8.64, 0.005)                                  | WILLIAM, E SMIDDY (2012.0) Clinical applications of cost analysis of diabetic macular edema treatments. OPTHALMOLOGY DOI 10.1016/j.ophtha.2012.09.015                                                                                                                                     |
| 2          | 121  | 0.931            | 2001        | aberrometry (15.39, 1.0E-4); refractive surgery (8.78, 0.005); contrast perception (7.6, 0.01); optical quality (7.6, 0.01); wavefront (7.6, 0.01)                                                            | B, NEERACHER (2004.0) Glare sensitivity and optical side effects 1 year after photorefractive keratectomy and laser in situ keratomileusis. JOURNAL OF CATARACT AND REFRACTIVE SURGERY DOI 10.1016/j.jcrs.2003.12.058                                                                     |
| 3          | 75   | 0.984            | 2014        | femtosecond laser (6.87, 0.01); posterior capsule rupture (6.07, 0.05); femtosecond laser-assisted cataract surgery (6.07, 0.05); zonular dehiscence (6.07, 0.05); laser-induced breakdown (6.07, 0.05)       | MARKO, POPOVIC (2016.0) Efficacy and safety of femtosecond laser-assisted cataract surgery compared with manual cataract surgery a meta-analysis of 14 567 eyes. OPTHALMOLOGY, V123, P14 DOI 10.1016/j.ophtha.2016.07.005                                                                 |
| 4          | 66   | 0.937            | 2008        | biomedical optics (5.05, 0.05); mmp-9 (5.05, 0.05); bioptics (5.05, 0.05); intracorneal ring (5.05, 0.05); diffuse lamellar keratitis (5.05, 0.05)                                                            | AYAD, A FARJO (2013.0) Femtosecond lasers for lasik flap creation a report by the american academy of ophthalmology. OPTHALMOLOGY, V120, P16 DOI 10.1016/j.ophtha.2012.08.013                                                                                                             |
| 5          | 63   | 0.973            | 2012        | smile (18.21, 1.0E-4); myopia (12.05, 0.001); corneenne (5.98, 0.05); fs-lasik (5.98, 0.05); corneal biomechanics (5.98, 0.05)                                                                                | A, CHICHE (2018.0) Smile (small incision lenticule extraction) among the corneal refractive surgeries in 2018 (french translation of the article). JOURNAL FRANCAIS D OPTHALMOLOGIE DOI 10.1016/j.jfo.2018.03.006                                                                         |
| 6          | 58   | 0.901            | 2015        | dry eye disease (18.69, 1.0E-4); meibomian gland dysfunction (10.61, 0.005); dry eye (8.49, 0.005); corneal nerves (7.94, 0.005); diabetic retinopathy (7.6, 0.01)                                            | DOREEN, SCHMIDL (2020.0) Novel approaches for imaging-based diagnosis of ocular surface disease. DIAGNOSTICS DOI 10.3390/diagnostics10080589                                                                                                                                              |
| 7          | 57   | 0.989            | 2006        | optical coherence tomography (7.3, 0.01); coherence (5.46, 0.05); adaptive optics (5.46, 0.05); ultrahigh resolution imaging (5.46, 0.05); fourier-domain optical coherence tomography (5.46, 0.05)           | SHAN, C LIN (2007.0) Optic nerve head and retinal nerve fiber layer analysis - a report by the american academy of ophthalmology. OPTHALMOLOGY, V114, P13 DOI 10.1016/j.ophtha.2007.07.005                                                                                                |
| 8          | 57   | 0.962            | 2005        | anterior chamber (8.89, 0.005); morphometry (8.89, 0.005); contact lens (6.14, 0.05); optical coherence tomography (5.12, 0.05); imaging (4.46, 0.05)                                                         | STEVEN, C SCHALLHORN (2008.0) Wavefront-guided lasik for the correction of primary myopia and astigmatism - a report by the american academy of ophthalmology. OPTHALMOLOGY, V115, P13 DOI 10.1016/j.ophtha.2008.04.010                                                                   |
| 9          | 47   | 0.943            | 2017        | glaucoma (16.52, 1.0E-4); trabeculectomy (8.21, 0.005); lasers (8.21, 0.005); micropulse laser (8.21, 0.005); ocular hypertension (8.21, 0.005)                                                               | GUS, GAZZARD (2019.0) Selective laser trabeculectomy versus drops for newly diagnosed ocular hypertension and glaucoma: the light ret. HEALTH TECHNOLOGY ASSESSMENT, V23, P103 DOI 10.3310/hta23310                                                                                       |
| 10         | 34   | 0.975            | 2017        | diabetic retinopathy (12.34, 0.001); screening (9.11, 0.005); diabetic eye disease (9.11, 0.005); deep learning (9.11, 0.005); diabetic macular edema (6.14, 0.05)                                            | MICHAEL, J GALE (2021.0) Diabetic eye disease: a review of screening and management recommendations. CLINICAL AND EXPERIMENTAL OPTHALMOLOGY, V49, P18 DOI 10.1111/ceo.13894                                                                                                               |
| 11         | 34   | 0.976            | 1997        | light emitting diode (NaN, 1.0); coherence (NaN, 1.0); regeneration (NaN, 1.0); sub-basal nerves (NaN, 1.0); microneuroma (NaN, 1.0)                                                                          | MB, MCDONALD (2002.0) Conductive keratoplasty for the correction of low to moderate hyperopia: us clinical trial 1-year results on 355 eyes. OPTHALMOLOGY, V109, P12 DOI 10.1016/S0161-6420(02)01255-1                                                                                    |
| 12         | 31   | 1                | 1991        | photorefractive keratectomy (19.07, 1.0E-4); eye (6.26, 0.05); corneal surgery (6.26, 0.05); photoablation (6.26, 0.05); photodisruption (6.26, 0.05)                                                         | JM, KRAUSS (1995.0) Lasers in ophthalmology. LASERS IN SURGERY AND MEDICINE, V17, P58 DOI 10.1002/lsm.1900170203                                                                                                                                                                          |
| 13         | 27   | 0.989            | 2003        | 3d (10.48, 0.005); uhr-oct (10.48, 0.005); retina (7.72, 0.01); diabetic retinopathy (0.16, 1.0); diabetic macular edema (0.13, 1.0)                                                                          | MIRJAM, E J VAN VELTHOVEN (2007.0) Recent developments in optical coherence tomography for imaging the retina. PROGRESS IN RETINAL AND EYE RESEARCH, V26, P21 DOI 10.1016/j.preteyeres.2006.10.002                                                                                        |
| 15         | 25   | 0.999            | 2002        | age-related macular degeneration (amd) (7.41, 0.01); complement factor h (cfh) (7.41, 0.01); complement factor b (bf) (7.41, 0.01); basal laminar deposit (bland) (7.41, 0.01); bruch's membrane (7.41, 0.01) | GEORGIA, CLEARY (2007.0) Effect of square-edged intraocular lenses on neodymium: yag laser capsulotomy rates in the united states. JOURNAL OF CATARACT AND REFRACTIVE SURGERY DOI 10.1016/j.jcrs.2007.06.056                                                                              |
| 20         | 20   | 0.992            | 1998        | light emitting diode (NaN, 1.0); coherence (NaN, 1.0); regeneration (NaN, 1.0); sub-basal nerves (NaN, 1.0); microneuroma (NaN, 1.0)                                                                          | DJ, APPLE (2001.0) Eradication of posterior capsule opacification - documentation. of a marked decrease in nd : yag laser posterior capsulotomy rates noted in an analysis of 5416 pseudophakic human eyes obtained postmortem. OPTHALMOLOGY, V108, P14 DOI 10.1016/S0161-6420(00)00589-3 |
| 28         | 10   | 0.998            | 1997        | light emitting diode (NaN, 1.0); coherence (NaN, 1.0); regeneration (NaN, 1.0); sub-basal nerves (NaN, 1.0); microneuroma (NaN, 1.0)                                                                          | MS, KOOK (2002.0) Effect of laser in situ keratomileusis on retinal nerve fiber layer thickness measurements by scanning laser polarimetry. JOURNAL OF CATARACT AND REFRACTIVE SURGERY DOI 10.1016/S0886-3350(01)01310-4                                                                  |
| 56         | 4    | 0.999            | 1997        | light emitting diode (NaN, 1.0); coherence (NaN, 1.0); regeneration (NaN, 1.0); sub-basal nerves (NaN, 1.0); microneuroma (NaN, 1.0)                                                                          | M, BUSIN (2001.0) Effect of hinged lamellar keratotomy on postkeratoplasty eyes. OPTHALMOLOGY DOI 10.1016/S0161-6420(01)00702-3                                                                                                                                                           |

Supplementary Table 2. Burstness analysis for countries, institutions, authors, references and keywords (1990-2022 and 2017-2022)

**A. Top 12 countries with the strongest beginning year of citation bursts (1990-2022)**

| Country      | Year | Strength | Begin | End  |
|--------------|------|----------|-------|------|
| SCOTLAND     | 1990 | 3.56     | 1993  | 1999 |
| SWEDEN       | 1990 | 3.71     | 1998  | 2002 |
| FINLAND      | 1990 | 4.64     | 1999  | 2005 |
| NETHERLANDS  | 1990 | 7.99     | 2002  | 2007 |
| AUSTRIA      | 1990 | 6.53     | 2003  | 2006 |
| ENGLAND      | 1990 | 3.66     | 2005  | 2006 |
| JAPAN        | 1990 | 5.76     | 2008  | 2009 |
| BRAZIL       | 1990 | 4.51     | 2009  | 2013 |
| INDIA        | 1990 | 11.04    | 2017  | 2022 |
| IRAN         | 1990 | 6.89     | 2017  | 2019 |
| SAUDI ARABIA | 1990 | 4.71     | 2018  | 2020 |
| PAKISTAN     | 1990 | 4.08     | 2018  | 2022 |

**B. Top 12 countries with the strongest strength of citation bursts (1990-2022)**

| Country      | Year | Strength | Begin | End  |
|--------------|------|----------|-------|------|
| INDIA        | 1990 | 11.64    | 2017  | 2022 |
| NETHERLANDS  | 1990 | 7.99     | 2002  | 2007 |
| IRAN         | 1990 | 6.89     | 2017  | 2019 |
| AUSTRIA      | 1990 | 6.53     | 2003  | 2006 |
| JAPAN        | 1990 | 5.76     | 2008  | 2009 |
| SAUDI ARABIA | 1990 | 4.71     | 2018  | 2020 |
| FINLAND      | 1990 | 4.64     | 1999  | 2005 |
| BRAZIL       | 1990 | 4.51     | 2009  | 2013 |
| PAKISTAN     | 1990 | 4.08     | 2018  | 2022 |
| SWEDEN       | 1990 | 3.71     | 1998  | 2002 |
| ENGLAND      | 1990 | 3.66     | 2005  | 2006 |
| SCOTLAND     | 1990 | 3.56     | 1993  | 1999 |

**C. Top 25 institutions with the strongest beginning year of citation bursts (1990-2022)**

| Institution                        | Year | Strength | Begin | End  |
|------------------------------------|------|----------|-------|------|
| Univ Vienna                        | 1990 | 14.42    | 1998  | 2002 |
| Harvard Univ                       | 1990 | 5.52     | 1998  | 2003 |
| Univ Texas                         | 1990 | 8.92     | 1999  | 2007 |
| Univ Helsinki                      | 1990 | 3.66     | 2002  | 2007 |
| Rotterdam Eye Hosp                 | 1990 | 4.18     | 2002  | 2007 |
| St Thomas Hosp                     | 1990 | 6.43     | 2003  | 2006 |
| Med Univ Vienna                    | 1990 | 9.27     | 2005  | 2011 |
| Univ Munich                        | 1990 | 5.16     | 2005  | 2014 |
| Univ Bonn                          | 1990 | 5.1      | 2008  | 2016 |
| Univ Wisconsin                     | 1990 | 5        | 2009  | 2014 |
| Johns Hopkins Univ                 | 1990 | 7.22     | 2010  | 2015 |
| Univ So Calif                      | 1990 | 6.85     | 2010  | 2015 |
| Retina Vitreous Associates Med Grp | 1990 | 5.12     | 2012  | 2016 |
| Univ Michigan                      | 1990 | 4.44     | 2012  | 2014 |
| Univ Milan                         | 1990 | 4.27     | 2012  | 2018 |
| UCL                                | 1990 | 4.64     | 2014  | 2020 |
| Gaumnach Inst                      | 1990 | 4.61     | 2014  | 2020 |
| Harvard Med Sch                    | 1990 | 9.48     | 2016  | 2022 |
| Aravind Eye Hosp                   | 1990 | 5.13     | 2016  | 2022 |
| Univ Tehran Med Sci                | 1990 | 5.9      | 2017  | 2019 |
| Univ Toronto                       | 1990 | 5.44     | 2018  | 2020 |
| Univ Washington                    | 1990 | 4.62     | 2018  | 2022 |
| Moorfields Eye Hosp NHS Fdn Trust  | 1990 | 6.4      | 2019  | 2022 |
| LV Prasad Eye Inst                 | 1990 | 4.92     | 2020  | 2022 |
| Duke NUS Med Sch                   | 1990 | 4.2      | 2020  | 2022 |

**D. Top 25 institutions with the strongest strength of citation bursts (1990-2022)**

| Institution                        | Year | Strength | Begin | End  |
|------------------------------------|------|----------|-------|------|
| Univ Vienna                        | 1990 | 14.42    | 1998  | 2002 |
| Harvard Med Sch                    | 1990 | 9.48     | 2016  | 2022 |
| Med Univ Vienna                    | 1990 | 9.27     | 2005  | 2011 |
| Univ Texas                         | 1990 | 8.92     | 1999  | 2007 |
| Johns Hopkins Univ                 | 1990 | 7.22     | 2010  | 2015 |
| Univ So Calif                      | 1990 | 6.85     | 2010  | 2015 |
| St Thomas Hosp                     | 1990 | 6.43     | 2003  | 2006 |
| Moorfields Eye Hosp NHS Fdn Trust  | 1990 | 6.4      | 2019  | 2022 |
| Univ Tehran Med Sci                | 1990 | 5.9      | 2017  | 2019 |
| Univ Helsinki                      | 1990 | 5.66     | 2002  | 2007 |
| Harvard Univ                       | 1990 | 5.52     | 1998  | 2003 |
| Univ Toronto                       | 1990 | 5.44     | 2018  | 2020 |
| Univ Munich                        | 1990 | 5.16     | 2005  | 2014 |
| Aravind Eye Hosp                   | 1990 | 5.13     | 2016  | 2022 |
| Retina Vitreous Associates Med Grp | 1990 | 5.12     | 2012  | 2016 |
| Univ Bonn                          | 1990 | 5.1      | 2008  | 2016 |
| Univ Wisconsin                     | 1990 | 5        | 2009  | 2014 |
| LV Prasad Eye Inst                 | 1990 | 4.92     | 2020  | 2022 |
| UCL                                | 1990 | 4.64     | 2014  | 2020 |
| Univ Washington                    | 1990 | 4.62     | 2018  | 2022 |
| Gaumnach Inst                      | 1990 | 4.61     | 2014  | 2020 |
| Univ Michigan                      | 1990 | 4.44     | 2012  | 2014 |
| Univ Milan                         | 1990 | 4.27     | 2012  | 2018 |
| Duke NUS Med Sch                   | 1990 | 4.2      | 2020  | 2022 |
| Rotterdam Eye Hosp                 | 1990 | 4.18     | 2002  | 2007 |

**E. Top 25 journals with the strongest beginning year of citation bursts (1990-2022)**

| Cited Journals       | Year | Strength | Begin | End  |
|----------------------|------|----------|-------|------|
| OPHTHALMIC SURG LAS  | 1990 | 58.65    | 1992  | 2004 |
| KLIN MONATSBL AUGENH | 1990 | 14.55    | 1992  | 2005 |
| REFRACT CORNEAL SURG | 1990 | 31.18    | 1995  | 2006 |
| J REFRACT CORNEAL S  | 1990 | 36.63    | 1995  | 2006 |
| GER J OPTHALMOL      | 1990 | 17.53    | 1995  | 2006 |
| AUST NZ J OPTHALMOL  | 1990 | 16.05    | 1996  | 2007 |
| J CATARACT REFR SURG | 1990 | 46.37    | 1998  | 2006 |
| ARCH OPTHALMOL CHC   | 1990 | 16.36    | 1998  | 2007 |
| J REFRACT SURG       | 1990 | 33.69    | 1999  | 2006 |
| OPHTHALMOLOGE        | 1990 | 16.16    | 2003  | 2007 |
| PLOS ONE             | 1990 | 43.58    | 2015  | 2022 |
| JAMA OPTHALMOL       | 1990 | 56.1     | 2016  | 2022 |
| OSU RETINA           | 1990 | 22.15    | 2016  | 2022 |
| COCHRANE DB SYST REV | 1990 | 14.45    | 2016  | 2022 |
| CLIN OPTHALMOL       | 1990 | 49.54    | 2017  | 2022 |
| SCI REP UK           | 1990 | 39.93    | 2017  | 2022 |
| J OPTHALMOL          | 1990 | 36.76    | 2017  | 2022 |
| ASIA-PAC J OPTHALMO  | 1990 | 18.47    | 2017  | 2022 |
| INDIAN J OPTHALMOL   | 1990 | 18.17    | 2017  | 2022 |
| TRANS VIS SCI TECH   | 1990 | 17.07    | 2017  | 2022 |
| INT J OPTHALMOL CH   | 1990 | 29.47    | 2018  | 2022 |
| MEDICINE             | 1990 | 17.26    | 2018  | 2022 |
| EYE VISION           | 1990 | 15.45    | 2018  | 2022 |
| BMC OPTHALMOL        | 1990 | 33.93    | 2019  | 2022 |
| OPHTHALMOL RETINA    | 1990 | 26.99    | 2019  | 2022 |

**F. Top 25 journals with the strongest strength of citation bursts (1990-2022)**

| Cited Journals       | Year | Strength | Begin | End  |
|----------------------|------|----------|-------|------|
| OPHTHALMIC SURG LAS  | 1990 | 58.65    | 1992  | 2004 |
| JAMA OPTHALMOL       | 1990 | 56.1     | 2016  | 2022 |
| REFRACT CORNEAL SURG | 1990 | 31.18    | 1995  | 2006 |
| CLIN OPTHALMOL       | 1990 | 49.54    | 2017  | 2022 |
| J CATARACT REFR SURG | 1990 | 46.37    | 1998  | 2006 |
| PLOS ONE             | 1990 | 43.58    | 2015  | 2022 |
| SCI REP UK           | 1990 | 39.93    | 2017  | 2022 |
| J OPTHALMOL          | 1990 | 36.76    | 2017  | 2022 |
| J REFRACT CORNEAL S  | 1990 | 36.63    | 1995  | 2006 |
| BMC OPTHALMOL        | 1990 | 33.93    | 2019  | 2022 |
| J REFRACT SURG       | 1990 | 33.69    | 1999  | 2006 |
| INT J OPTHALMOL CH   | 1990 | 29.47    | 2018  | 2022 |
| OPHTHALMOL RETINA    | 1990 | 26.99    | 2019  | 2022 |
| OSU RETINA           | 1990 | 22.15    | 2016  | 2022 |
| ASIA-PAC J OPTHALMO  | 1990 | 18.47    | 2017  | 2022 |
| INDIAN J OPTHALMOL   | 1990 | 18.17    | 2017  | 2022 |
| GER J OPTHALMOL      | 1990 | 17.53    | 1995  | 2006 |
| MEDICINE             | 1990 | 17.26    | 2018  | 2022 |
| TRANS VIS SCI TECH   | 1990 | 17.07    | 2017  | 2022 |
| ARCH OPTHALMOL CHC   | 1990 | 16.36    | 1998  | 2007 |
| OPHTHALMOLOGE        | 1990 | 16.16    | 2003  | 2007 |
| AUST NZ J OPTHALMOL  | 1990 | 16.05    | 1996  | 2007 |
| EYE VISION           | 1990 | 15.45    | 2018  | 2022 |
| KLIN MONATSBL AUGENH | 1990 | 14.55    | 1992  | 2005 |
| COCHRANE DB SYST REV | 1990 | 14.45    | 2016  | 2022 |

**G. Top 25 journals with the strongest beginning year of citation bursts (2017-2022)**

| Cited Journals                 | Year | Strength | Begin | End  |
|--------------------------------|------|----------|-------|------|
| OPHTHALMIC SURG LAS            | 2017 | 4.64     | 2017  | 2019 |
| J CELL BIOL                    | 2017 | 3.03     | 2017  | 2018 |
| NAT REV DRUG DISCOV            | 2017 | 2.65     | 2017  | 2018 |
| HUM MOL GENET                  | 2017 | 2.27     | 2017  | 2018 |
| RETINA                         | 2017 | 2.26     | 2017  | 2018 |
| INDIAN JOURNAL OF OPTHALMOLOGY | 2017 | 2.09     | 2017  | 2018 |
| DEVELOPMENT                    | 2017 | 2.77     | 2018  | 2019 |
| TAM OPTHAL SOC                 | 2017 | 2.64     | 2018  | 2019 |
| PROG BRAIN RES                 | 2017 | 2.64     | 2018  | 2019 |
| J COMP NEUROL                  | 2017 | 2.64     | 2018  | 2019 |
| J HISTOCHEM CYTOCHEM           | 2017 | 2.27     | 2018  | 2019 |
| LARYNGOSCOPE                   | 2017 | 2.27     | 2018  | 2019 |
| ZHONGHUA YAN KE ZA ZHI         | 2017 | 3.24     | 2019  | 2020 |
| ORBIT                          | 2017 | 2.59     | 2019  | 2020 |
| MED IMAGE ANAL                 | 2017 | 2.59     | 2019  | 2020 |
| J NEURO-OPTHALMOL              | 2017 | 2.27     | 2019  | 2020 |
| RETIN CASES BRIEF REP          | 2017 | 3.23     | 2020  | 2022 |
| STAT MED                       | 2017 | 2.36     | 2020  | 2022 |
| LIGHT SCI APPL                 | 2017 | 2.36     | 2020  | 2022 |
| JOVE J VIS EXP                 | 2017 | 2.36     | 2020  | 2022 |
| PHYS REV LETT                  | 2017 | 2.36     | 2020  | 2022 |
| SENSORS-BASEL                  | 2017 | 2.36     | 2020  | 2022 |
| APPL PHYS B-LASERS O           | 2017 | 2.15     | 2020  | 2022 |
| METHODS MOL BIOL               | 2017 | 2.06     | 2020  | 2022 |
| J OPT SOC AM B                 | 2017 | 2.06     | 2020  | 2022 |

**H. Top 25 journals with the strongest strength of citation bursts (2017-2022)**

| Cited Journals                 | Year | Strength | Begin | End  |
|--------------------------------|------|----------|-------|------|
| OPHTHALMIC SURG LAS            | 2017 | 4.64     | 2017  | 2019 |
| ZHONGHUA YAN KE ZA ZHI         | 2017 | 3.24     | 2019  | 2020 |
| RETIN CASES BRIEF REP          | 2017 | 3.23     | 2020  | 2022 |
| J CELL BIOL                    | 2017 | 3.03     | 2017  | 2018 |
| DEVELOPMENT                    | 2017 | 2.77     | 2018  | 2019 |
| NAT REV DRUG DISCOV            | 2017 | 2.65     | 2017  | 2018 |
| TAM OPTHAL SOC                 | 2017 | 2.64     | 2018  | 2019 |
| PROG BRAIN RES                 | 2017 | 2.64     | 2018  | 2019 |
| J COMP NEUROL                  | 2017 | 2.64     | 2018  | 2019 |
| ORBIT                          | 2017 | 2.59     | 2019  | 2020 |
| MED IMAGE ANAL                 | 2017 | 2.59     | 2019  | 2020 |
| LIGHT SCI APPL                 | 2017 | 2.36     | 2020  | 2022 |
| JOVE J VIS EXP                 | 2017 | 2.36     | 2020  | 2022 |
| PHYS REV LETT                  | 2017 | 2.36     | 2020  | 2022 |
| SENSORS-BASEL                  | 2017 | 2.36     | 2020  | 2022 |
| HUM MOL GENET                  | 2017 | 2.27     | 2017  | 2018 |
| J NEURO-OPTHALMOL              | 2017 | 2.27     | 2019  | 2020 |
| J HISTOCHEM CYTOCHEM           | 2017 | 2.27     | 2018  | 2019 |
| LARYNGOSCOPE                   | 2017 | 2.27     | 2018  | 2019 |
| RETINA                         | 2017 | 2.26     | 2017  | 2019 |
| APPL PHYS B-LASERS O           | 2017 | 2.15     | 2020  | 2022 |
| INDIAN JOURNAL OF OPTHALMOLOGY | 2017 | 2.09     | 2017  | 2018 |
| METHODS MOL BIOL               | 2017 | 2.06     | 2020  | 2022 |
| J OPT SOC AM B                 | 2017 | 2.06     | 2020  | 2022 |

**I. Top 20 co-authors with the strongest beginning year of citation bursts (1990-2022)**

| Authors                | Year | Strength | Begin | End  |
|------------------------|------|----------|-------|------|
| JL ALLO                | 1990 | 4.73     | 1997  | 2005 |
| O FINDL                | 1990 | 6.21     | 1998  | 2005 |
| A KRUGER               | 1990 | 4.24     | 1998  | 2002 |
| M MROCHEN              | 1990 | 4.19     | 2001  | 2002 |
| T SEILER               | 1990 | 4.19     | 2001  | 2002 |
| J MARSHALL             | 1990 | 4.42     | 2003  | 2005 |
| R MENAPACE             | 1990 | 3.59     | 2003  | 2005 |
| W BUEHL                | 1990 | 4.19     | 2004  | 2005 |
| RUPERT MENAPACE        | 1990 | 4.22     | 2007  | 2009 |
| FRANK G HOLZ           | 1990 | 6.03     | 2008  | 2016 |
| ROBERT VITTI           | 1990 | 4.26     | 2009  | 2016 |
| PETER A CAMPOCHIARO    | 1990 | 4.69     | 2010  | 2016 |
| URSULA SCHMIDT-ERFURTH | 1990 | 4.58     | 2010  | 2014 |
| DAVID M BROWN          | 1990 | 6.06     | 2011  | 2018 |
| MINGGIANG HE           | 1990 | 4.68     | 2012  | 2014 |
| TIN AUNG               | 1990 | 4.01     | 2012  | 2022 |
| DAVID S BOYER          | 1990 | 5.31     | 2014  | 2018 |
| THOMAS KOHNEN          | 1990 | 4.13     | 2014  | 2020 |
| ROBERT VITTI           | 1990 | 4.25     | 2015  | 2018 |
| ALYSON J BERLINER      | 1990 | 3.72     | 2015  | 2018 |

**J. Top 20 co-authors with the strongest strength of citation bursts (1990-2022)**

| Authors                | Year | Strength | Begin | End  |
|------------------------|------|----------|-------|------|
| O FINDL                | 1990 | 6.21     | 1998  | 2005 |
| DAVID M BROWN          | 1990 | 6.06     | 2011  | 2018 |
| FRANK G HOLZ           | 1990 | 6.03     | 2008  | 2016 |
| DAVID S BOYER          | 1990 | 5.31     | 2014  | 2018 |
| ROBERT VITTI           | 1990 | 4.76     | 2009  | 2016 |
| JL ALLO                | 1990 | 4.73     | 1997  | 2005 |
| PETER A CAMPOCHIARO    | 1990 | 4.69     | 2010  | 2016 |
| MINGGIANG HE           | 1990 | 4.68     | 2012  | 2014 |
| URSULA SCHMIDT-ERFURTH | 1990 | 4.58     | 2010  | 2014 |
| J MARSHALL             | 1990 | 4.42     | 2003  | 2005 |
| ROBERT VITTI           | 1990 | 4.25     | 2015  | 2018 |
| A KRUGER               | 1990 | 4.24     | 1998  | 2002 |
| RUPERT MENAPACE        | 1990 | 4.22     | 2007  | 2009 |
| M MROCHEN              | 1990 | 4.19     | 2001  | 2002 |
| T SEILER               | 1990 | 4.19     | 2001  | 2002 |
| W BUEHL                | 1990 | 4.19     | 2004  | 2005 |
| THOMAS KOHNEN          | 1990 | 4.13     | 2014  | 2    |





**Supplementary Table 3. The top countries and institutions (1990-2022 and 2017-2022 period).**

| 1990-2022 period               |                        |                                     |                           |                                   |                        |                                        |                           |
|--------------------------------|------------------------|-------------------------------------|---------------------------|-----------------------------------|------------------------|----------------------------------------|---------------------------|
| Countries ranked by centrality | Betweenness centrality | Countries ranked by citation counts | Total number of citations | Institutions ranked by centrality | Betweenness centrality | Institutions ranked by citation counts | Total number of citations |
| USA                            | 0.6                    | USA                                 | 1039                      | Johns Hopkins Univ                | 0.09                   | Johns Hopkins Univ                     | 83                        |
| GERMANY                        | 0.19                   | GERMANY                             | 335                       | Harvard Univ                      | 0.05                   | Harvard Univ                           | 56                        |
| ITALY                          | 0.15                   | ENGLAND                             | 242                       | Moorfields Eye Hosp               | 0.04                   | Med Univ Vienna                        | 44                        |
| ENGLAND                        | 0.14                   | PEOPLES R CHINA                     | 163                       | Univ Melbourne                    | 0.04                   | Singapore Natl Eye Ctr                 | 44                        |
| FRANCE                         | 0.12                   | JAPAN                               | 144                       | Med Univ Vienna                   | 0.03                   | Moorfields Eye Hosp                    | 43                        |
| AUSTRALIA                      | 0.09                   | ITALY                               | 138                       | Harvard Med Sch                   | 0.03                   | Stanford Univ                          | 35                        |
| SPAIN                          | 0.08                   | FRANCE                              | 128                       | Singapore Natl Eye Ctr            | 0.03                   | Univ Miami                             | 33                        |
| AUSTRIA                        | 0.07                   | AUSTRIA                             | 123                       | Univ Calif Los Angeles            | 0.03                   | Univ Calif Los Angeles                 | 30                        |
| ISRAEL                         | 0.07                   | AUSTRALIA                           | 109                       | Stanford Univ                     | 0.03                   | Univ Calif San Diego                   | 30                        |
| SWITZERLAND                    | 0.06                   | SPAIN                               | 105                       | Univ Milan                        | 0.02                   | Harvard Med Sch                        | 29                        |
| 2017-2022 period               |                        |                                     |                           |                                   |                        |                                        |                           |
| Countries ranked by centrality | Betweenness centrality | Countries ranked by citation counts | Total number of citations | Institutions ranked by centrality | Betweenness centrality | Institutions ranked by citation counts | Total number of citations |
| USA                            | 0.53                   | USA                                 | 299                       | Harvard Med Sch                   | 0.21                   | Harvard Med Sch                        | 27                        |
| ENGLAND                        | 0.14                   | GERMANY                             | 101                       | Moorfields Eye Hosp               | 0.13                   | Johns Hopkins Univ                     | 24                        |
| ITALY                          | 0.13                   | PEOPLES R CHINA                     | 80                        | Univ Melbourne                    | 0.11                   | Singapore Natl Eye Ctr                 | 22                        |
| GERMANY                        | 0.12                   | ENGLAND                             | 79                        | Singapore Natl Eye Ctr            | 0.1                    | Moorfields Eye Hosp                    | 15                        |
| AUSTRALIA                      | 0.12                   | INDIA                               | 60                        | Cleveland Clin                    | 0.1                    | Moorfields Eye Hosp NHS Fdn Trust      | 14                        |
| FRANCE                         | 0.12                   | AUSTRALIA                           | 47                        | Univ Illinois                     | 0.09                   | Stanford Univ                          | 14                        |
| SWITZERLAND                    | 0.11                   | ITALY                               | 47                        | Univ Milan                        | 0.09                   | UCL                                    | 14                        |
| SINGAPORE                      | 0.1                    | FRANCE                              | 43                        | Univ Sydney                       | 0.07                   | Singapore Eye Res Inst                 | 14                        |
| INDIA                          | 0.09                   | SWITZERLAND                         | 37                        | Univ Calif Los Angeles            | 0.07                   | Univ Illinois                          | 13                        |
| BRAZIL                         | 0.07                   | CANADA                              | 31                        | Retina Consultants Houston        | 0.06                   | Univ Sydney                            | 13                        |

**Supplementary Table 4. Summary of the largest clusters identified for the author co-citation network (2017-2022) obtained with CiteSpace.**

| Cluster ID | Size | Silhouette score | Mean (Year) | Top five extracted terms based on keywords (Log-likelihood ratio algorithm; p-level)                                                                                                            |
|------------|------|------------------|-------------|-------------------------------------------------------------------------------------------------------------------------------------------------------------------------------------------------|
| 0          | 80   | 0.939            | 2018        | diabetic macular edema (48.7, 1.0E-4); diabetic retinopathy (25.4, 1.0E-4); anti-vegf (14.98, 0.001); age-related macular degeneration (8.96, 0.005); intravitreal injection (8.96, 0.005)      |
| 1          | 67   | 0.877            | 2018        | dry eye disease (25.32, 1.0E-4); meibomian gland dysfunction (22.61, 1.0E-4); in vivo confocal microscopy (11.14, 0.001); intense pulsed light (9.63, 0.005); diabetic retinopathy (7.27, 0.01) |
| 2          | 46   | 0.877            | 2018        | refractive surgery (18.19, 1.0E-4); smile (14.49, 0.001); prk (10.85, 0.001); lasik (10.46, 0.005); small incision lenticule extraction (7.22, 0.01)                                            |
| 3          | 44   | 0.965            | 2018        | cyclophotocoagulation (15.62, 1.0E-4); refractory glaucoma (15.62, 1.0E-4); glaucoma (11.91, 0.001); laser trabeculectomy (10.38, 0.005); selective laser trabeculectomy (10.38, 0.005)         |
| 4          | 33   | 0.966            | 2019        | phacoemulsification (21.27, 1.0E-4); femtosecond laser (8.18, 0.005); cataract surgery (6.49, 0.05); femtosecond laser-assisted cataract surgery (4.89, 0.05); capsulotomy (4.22, 0.05)         |
| 5          | 32   | 0.988            | 2018        | retinopathy of prematurity (36.23, 1.0E-4); retina (8.11, 0.005); anterior segment (5.89, 0.05); hyperoxia/hypoxia (5.89, 0.05); eye refractive (5.89, 0.05)                                    |
| 6          | 31   | 0.919            | 2018        | glaucoma (9.51, 0.005); angle closure (9.33, 0.005); gonioscopy (9.33, 0.005); uveitis (9.33, 0.005); laser peripheral iridotomy (9.33, 0.005)                                                  |
| 7          | 9    | 0.932            | 2020        | ophthalmic imaging (7.08, 0.01); optical coherence tomography (7.08, 0.01); screening (4.37, 0.05); non-linear optical microscopy (4.37, 0.05); functional oct (4.37, 0.05)                     |
| 8          | 4    | 1                | 2017        | issue 138 (7.16, 0.01); retinal neovascularization (7.16, 0.01); pam (7.16, 0.01); photoacoustic microscopy (7.16, 0.01); multimodal imaging (7.16, 0.01)                                       |

Supplementary Table 5. Average citations and total link strength of authors per cluster based on bibliographic coupling analysis (Countries) .

| Countries       | Cluster | Total Link Strength | Avg. citations |
|-----------------|---------|---------------------|----------------|
| argentina       | 3       | 2335                | 37.2857        |
| aruba           | 1       | 138                 | 36             |
| australia       | 1       | 45759               | 62.6126        |
| austria         | 2       | 39919               | 80.2619        |
| belarus         | 2       | 963                 | 5.2857         |
| belgium         | 2       | 6077                | 30.5           |
| bosnia & herceg | 2       | 177                 | 39             |
| brazil          | 1       | 23182               | 50.5763        |
| bulgaria        | 3       | 288                 | 13.25          |
| burkina faso    | 1       | 10                  | 15             |
| cameroon        | 1       | 72                  | 15             |
| canada          | 1       | 20360               | 58.0814        |
| chile           | 1       | 5936                | 131.5          |
| colombia        | 3       | 144                 | 17.6667        |
| costa rica      | 1       | 144                 | 5              |
| cote ivoire     | 2       | 570                 | 6              |
| croatia         | 1       | 481                 | 5.3333         |
| cyprus          | 3       | 101                 | 0              |
| czech republic  | 3       | 2735                | 23.4           |
| dem rep congo   | 2       | 58                  | 1              |
| denmark         | 1       | 9844                | 53.28          |
| egypt           | 1       | 5288                | 20.6897        |
| england         | 1       | 74318               | 43.7317        |
| estonia         | 2       | 291                 | 35             |
| finji           | 1       | 97                  | 15             |
| finland         | 3       | 5553                | 58.4783        |
| france          | 2       | 41470               | 77.3692        |
| germany         | 2       | 82113               | 47.8791        |
| ghana           | 1       | 75                  | 0              |
| greece          | 3       | 12892               | 25.6842        |
| guatemala       | 1       | 505                 | 162            |
| hungary         | 3       | 5312                | 38.381         |
| iceland         | 1       | 2030                | 75             |
| india           | 1       | 28480               | 30.3111        |
| iran            | 1       | 6278                | 11.4           |
| ireland         | 3       | 3614                | 40.6154        |
| israel          | 1       | 9342                | 25.5476        |
| italy           | 3       | 42979               | 53.9583        |
| japan           | 1       | 40809               | 52.9931        |
| kazakhstan      | 5       | 0                   | 0              |
| kenya           | 1       | 152                 | 18             |
| kuwait          | 3       | 48                  | 2              |
| latvia          | 4       | 60                  | 0              |
| lebanon         | 3       | 1274                | 12             |
| lithuania       | 4       | 819                 | 1.3333         |
| malawi          | 1       | 1511                | 20.5           |
| malaysia        | 1       | 1252                | 13.5           |
| mexico          | 1       | 6555                | 45.6667        |
| mongolia        | 1       | 144                 | 5              |
| morocco         | 2       | 30                  | 2              |
| nepal           | 1       | 1456                | 11.625         |
| netherlands     | 2       | 17935               | 72             |
| new zealand     | 1       | 3580                | 28.3846        |
| nigeria         | 1       | 1829                | 12.3333        |
| north ireland   | 2       | 10600               | 44.6429        |
| norway          | 1       | 2178                | 55.875         |
| oman            | 3       | 255                 | 129            |
| pakistan        | 1       | 4356                | 3.6061         |
| peoples r china | 1       | 36218               | 25.716         |
| peru            | 1       | 56                  | 11             |
| philippines     | 1       | 512                 | 28.4           |
| poland          | 2       | 5024                | 8.6364         |
| portugal        | 2       | 8795                | 30.4545        |
| romania         | 3       | 259                 | 12.2           |
| ruusia          | 2       | 3980                | 8.48           |
| rwanda          | 1       | 2073                | 128.5          |
| saudi arabia    | 1       | 3673                | 19.8276        |
| scotland        | 3       | 11623               | 67.2381        |
| serbia          | 2       | 970                 | 11.75          |
| singapore       | 1       | 33861               | 58.2192        |
| slovenia        | 2       | 234                 | 12.6           |
| south africa    | 3       | 1781                | 63.6667        |
| south korea     | 1       | 16575               | 42             |
| spain           | 3       | 29885               | 59.1869        |
| sweden          | 1       | 7052                | 85.9231        |
| switzerland     | 2       | 31217               | 81.6517        |
| taiwan          | 1       | 12866               | 22.8837        |
| tanzania        | 1       | 319                 | 16.5           |
| thailand        | 1       | 5134                | 38.1538        |
| tunisia         | 2       | 92                  | 0              |
| turkey          | 3       | 10127               | 20             |
| u arab emirates | 1       | 3059                | 40.1111        |
| ukraine         | 1       | 793                 | 74             |
| usa             | 1       | 196396              | 50.6796        |
| ussr            | 2       | 3                   | 5              |
| venezuela       | 1       | 1397                | 59             |
| vietnam         | 1       | 434                 | 4              |
| wales           | 1       | 5662                | 16.2308        |
| yemen           | 1       | 221                 | 3              |

Supplementary Table 5. Average citations and total link strength of authors per cluster based on bibliographic coupling analysis (Institutions) .

| Institutions                               | Cluster | Total Link Strength | Avg. citations |
|--------------------------------------------|---------|---------------------|----------------|
| aarhus univ hosp                           | 2       | 5352                | 103.6          |
| aberdeen royal infirm                      | 7       | 1114                | 18             |
| acad hosp maastricht                       | 1       | 1112                | 36             |
| ain shams univ                             | 1       | 124                 | 7.75           |
| albany med coll                            | 1       | 1232                | 39.8333        |
| all india inst med sci                     | 1       | 2641                | 10.7273        |
| allergan pharmaceut inc                    | 2       | 3315                | 222.5          |
| amer acad ophthalmol                       | 4       | 973                 | 30.2           |
| amer univ beirut                           | 4       | 1201                | 10.25          |
| aravind eye hosp                           | 3       | 4433                | 12.2857        |
| aristotle univ thessaloniki                | 4       | 9277                | 29.8333        |
| armed forces inst ophthalmol               | 1       | 593                 | 4.2            |
| assoc innovat & biomed res light & image   | 2       | 4073                | 30.5           |
| aston univ                                 | 6       | 11057               | 42.4           |
| bascom palmer eye inst                     | 1       | 4494                | 111.9          |
| bausch & lomb inc                          | 1       | 1898                | 50.1429        |
| bayer healthcare                           | 2       | 12491               | 170.625        |
| baylor coll med                            | 1       | 9794                | 41.1538        |
| belfast hlth & social care trust           | 5       | 2107                | 23.8333        |
| ben gurion univ negev                      | 1       | 2338                | 28.8571        |
| boston univ                                | 1       | 2317                | 5.4            |
| bristol eye hosp                           | 2       | 4658                | 64.625         |
| cairo univ                                 | 1       | 232                 | 10.1667        |
| calif retina consultants                   | 2       | 5502                | 20             |
| capital med univ                           | 1       | 1971                | 27.6667        |
| cardiff univ                               | 3       | 5134                | 14.4444        |
| case western reserve univ                  | 3       | 3346                | 27.5714        |
| catholic univ korea                        | 2       | 5153                | 42             |
| catholic univ louvain                      | 1       | 495                 | 19.5           |
| chang gung mem hosp                        | 3       | 6275                | 26.1111        |
| chang gung univ                            | 3       | 6142                | 23.25          |
| charlotte eye ear nose & throat associates | 2       | 1192                | 91.6           |
| cheltenham gen hosp                        | 5       | 3046                | 149.2          |
| childrens hosp philadelphia                | 1       | 1355                | 19.8           |
| chinese acad sci                           | 3       | 1478                | 20.5           |
| chinese univ hong kong                     | 1       | 8851                | 53.0833        |
| chu bordeaux                               | 2       | 8233                | 153.7143       |
| cincinnati eye inst                        | 3       | 1045                | 123            |
| cleveland clin                             | 6       | 21215               | 29.8125        |
| cleveland clin fdn                         | 1       | 933                 | 49.8571        |
| cnr                                        | 4       | 47                  | 14             |
| columbia univ                              | 1       | 5020                | 35.7059        |
| cornea & laser eye inst                    | 1       | 889                 | 19.25          |
| ctr sight                                  | 3       | 1679                | 15.5           |
| dalhousie univ                             | 1       | 2534                | 65.0909        |
| doheny eye inst                            | 5       | 6456                | 21.2           |
| duke nus grad med sch                      | 3       | 2493                | 40.5           |
| duke nus med sch                           | 3       | 9656                | 11.4           |
| duke univ                                  | 6       | 21994               | 79.9643        |
| emory univ                                 | 1       | 9109                | 56.8571        |
| erasmus mc                                 | 2       | 2897                | 38.2           |
| flinders med ctr                           | 1       | 2553                | 71.4           |
| flinders univ s australia                  | 1       | 4129                | 52             |
| fu jen catholic univ                       | 2       | 4263                | 6.25           |
| fudan univ                                 | 1       | 3131                | 24.8333        |
| gazi univ                                  | 1       | 631                 | 12.4           |
| genentech inc                              | 2       | 15866               | 119            |
| gloucestershire hosp nhs fdn trust         | 2       | 3040                | 16             |
| goethe univ                                | 1       | 1800                | 10.5556        |
| goethe univ frankfurt                      | 1       | 3989                | 27.5556        |
| hackensack univ                            | 1       | 892                 | 45.5           |
| hadassah univ hosp                         | 1       | 611                 | 21.4           |
| hanusch hosp                               | 2       | 4871                | 15.75          |
| harbin med univ                            | 3       | 1255                | 25             |
| harvard med sch                            | 3       | 18373               | 32.6129        |
| harvard univ                               | 1       | 20552               | 83.1379        |
| hebrew univ jerusalem                      | 2       | 1532                | 17.8333        |
| heidelberg univ                            | 1       | 1816                | 49.5714        |
| helsinki univ hosp                         | 1       | 428                 | 7.25           |
| hong kong eye hosp                         | 1       | 1425                | 29             |
| houston methodist hosp                     | 2       | 6878                | 18.4286        |
| icahn sch med mt sinai                     | 3       | 1543                | 11.5           |
| indiana univ                               | 4       | 1502                | 48.6667        |
| indiana univ sch med                       | 2       | 2438                | 32             |
| inje univ                                  | 1       | 1299                | 65.6667        |
| inserm                                     | 2       | 8347                | 82.1176        |
| inst ophthalmol                            | 3       | 1815                | 71.2857        |
| iran univ med sci                          | 1       | 1150                | 7.7143         |
| irces                                      | 4       | 880                 | 58.4           |
| istanbul univ                              | 3       | 951                 | 30             |
| jaeb ctr hlth res                          | 2       | 7653                | 147.5833       |
| johannes gutenberg univ mainz              | 4       | 3053                | 56.1429        |
| john radcliffe hosp                        | 2       | 818                 | 52.25          |
| johns hopkins bloomberg sch publ hlth      | 3       | 3669                | 50.1429        |
| johns hopkins sch med                      | 2       | 4225                | 128.1429       |
| johns hopkins univ                         | 2       | 41268               | 81.7791        |
| johns hopkins univ hosp                    | 1       | 3003                | 38.5           |
| joslin diabet ctr                          | 2       | 9800                | 74.1111        |
| jules stein eye inst                       | 1       | 429                 | 24             |
| juntendo univ                              | 3       | 1110                | 24.25          |
| kanazawa univ                              | 3       | 513                 | 28.3333        |
| kaohsiung med univ                         | 2       | 2822                | 9.6            |
| keio univ                                  | 6       | 12476               | 43.1905        |
| king khalid eye specialist hosp            | 4       | 680                 | 10.4444        |
| king saud univ                             | 1       | 1283                | 39.875         |
| kings coll london                          | 3       | 5031                | 35.6364        |
| kitasato univ                              | 1       | 1918                | 32.3333        |
| kobe univ                                  | 1       | 565                 | 45.5           |
| korea univ                                 | 2       | 2644                | 13.8           |
| kymenlaakso cent hosp                      | 1       | 552                 | 7.75           |
| kyoto univ                                 | 1       | 1360                | 49.75          |
| landeskrankenhaus feldkirch                | 2       | 7304                | 1.5            |
| leiden univ                                | 2       | 2782                | 43.25          |
| lithuanian univ hlth sci                   | 3       | 807                 | 1.3333         |
| london sch hyg & trop med                  | 3       | 6195                | 46.2667        |
| london vis clin                            | 1       | 1037                | 14             |
| louisiana state univ                       | 1       | 1683                | 43.2727        |

|                                    |   |       |          |
|------------------------------------|---|-------|----------|
| ludwig maximilians univ munchen    | 4 | 2374  | 22.4     |
| lv prasad eye inst                 | 6 | 10970 | 40.5     |
| mahidol univ                       | 3 | 1028  | 36.4     |
| manchester royal eye hosp          | 2 | 921   | 20       |
| manhattan eye ear & throat hosp    | 5 | 724   | 30.4     |
| marsden eye res                    | 5 | 1928  | 33.75    |
| masaryk univ hosp                  | 1 | 1083  | 39.5     |
| mashhad univ med sci               | 1 | 855   | 4        |
| massachusetts eye & ear            | 1 | 443   | 0.5      |
| massachusetts eye & ear infirm     | 1 | 469   | 32.6     |
| massachusetts gen hosp             | 1 | 940   | 30.6     |
| mayo clin                          | 2 | 13407 | 49.8889  |
| mcgill univ                        | 4 | 1301  | 34.4286  |
| mcmaster univ                      | 4 | 2912  | 33.6667  |
| med coll wisconsin                 | 2 | 2927  | 40.375   |
| med univ graz                      | 6 | 15549 | 34.625   |
| med univ innsbruck                 | 2 | 7503  | 5        |
| med univ lubeck                    | 5 | 894   | 105.75   |
| med univ s carolina                | 1 | 1359  | 118.8333 |
| med univ vienna                    | 2 | 22196 | 84.8776  |
| med univ wien                      | 2 | 6002  | 56.75    |
| methodist hosp                     | 2 | 4890  | 143.3333 |
| michigan state univ                | 1 | 1136  | 7.8333   |
| midwest eye inst                   | 2 | 5642  | 219.5714 |
| miguel hernandez univ              | 1 | 1029  | 44.6667  |
| mit                                | 1 | 3883  | 204.3846 |
| mivata eye hosp                    | 1 | 988   | 76.75    |
| montefiore med ctr                 | 1 | 519   | 3.8      |
| moorfields eye hosp                | 3 | 26087 | 35       |
| moorfields eye hosp nhs fdn trust  | 3 | 12555 | 48.6923  |
| nagova univ hosp                   | 2 | 6956  | 258      |
| nanvang technol univ               | 3 | 6394  | 17.4286  |
| natl cheng kung univ hosp          | 1 | 1108  | 17.4     |
| natl taiwan univ                   | 2 | 3785  | 13.6667  |
| natl taiwan univ hosp              | 1 | 4586  | 20       |
| natl univ hlth syst                | 3 | 3782  | 92.8571  |
| natl univ singapore                | 3 | 18546 | 62.4474  |
| natl yang ming univ                | 2 | 4010  | 8.8333   |
| nei                                | 5 | 12139 | 145.2632 |
| new york eye & ear infirm          | 1 | 4589  | 61.6429  |
| new york med coll                  | 1 | 1550  | 47.25    |
| newcastle univ                     | 2 | 2679  | 5.8      |
| noor eye hosp                      | 1 | 963   | 6        |
| northwestern univ                  | 2 | 4541  | 52.875   |
| novartis pharma ag                 | 2 | 7542  | 179.25   |
| nvu                                | 1 | 2594  | 30.8333  |
| oakland univ                       | 1 | 1227  | 27.4     |
| odense univ hosp                   | 1 | 2340  | 54.2857  |
| ohio state univ                    | 1 | 3210  | 85.2     |
| ophthalm consultants boston        | 2 | 11215 | 154      |
| oregon hlth & sci univ             | 1 | 10678 | 64.8     |
| osaka univ                         | 1 | 1810  | 118.75   |
| palmetto retina ctr                | 2 | 3640  | 186.5    |
| paracelsus med univ salzburg       | 4 | 503   | 36.8333  |
| peking univ                        | 2 | 3904  | 28.875   |
| penn state coll med                | 1 | 1222  | 23.3333  |
| pfizer inc                         | 5 | 2968  | 157.5    |
| postgrad inst med educ & res       | 2 | 2098  | 66.75    |
| prince wales hosp                  | 3 | 229   | 14.5     |
| pusan natl univ                    | 1 | 512   | 14.25    |
| queens univ                        | 4 | 3487  | 13.9091  |
| queens univ belfast                | 5 | 9073  | 64.9     |
| quinze vingts natl ophthalmol hosp | 6 | 2959  | 71.75    |
| rambam hlth care campus            | 1 | 1252  | 7.25     |
| regeneron pharmaceut inc           | 2 | 17927 | 133.6923 |
| res inst ophthalmol                | 1 | 711   | 49.4     |
| retina associates new jersey       | 2 | 4232  | 410      |
| retina consultants houston         | 2 | 16663 | 215.8462 |
| retina consultants ltd             | 6 | 724   | 11.75    |
| retina inst                        | 4 | 283   | 6.5      |
| retina vitreous associates med grp | 2 | 22004 | 275.5    |
| rhein westfal th aachen            | 3 | 2518  | 17.5     |
| rotterdam eye hosp                 | 1 | 2355  | 46.9231  |
| royal liverpool univ hosp          | 2 | 6437  | 32.4     |
| royal perth hosp                   | 5 | 2992  | 30.625   |
| royal victoria hosp                | 2 | 3763  | 16.2     |
| royal victoria infirm              | 2 | 661   | 31       |
| royal victorian eye & ear hosp     | 5 | 6951  | 73.4615  |
| ruhr univ bochum                   | 1 | 649   | 14.5     |
| rush univ                          | 1 | 908   | 20.5     |
| russian acad sci                   | 1 | 1091  | 10.7273  |
| saarland univ                      | 6 | 1191  | 4.6667   |
| sahlgrens univ hosp                | 1 | 603   | 25.75    |
| sankara nethralaya                 | 3 | 3545  | 14.4444  |
| sanno hosp                         | 1 | 1216  | 34.4     |
| schepens eye res inst              | 1 | 1000  | 63       |
| semmelweis univ                    | 4 | 4504  | 49.2667  |
| seoul natl univ                    | 2 | 2636  | 11.5714  |
| shahid beheshti univ med sci       | 1 | 1085  | 6.1111   |
| shanghai jiao tong univ            | 1 | 4342  | 44.2     |
| singapore eye res inst             | 3 | 13050 | 42.8966  |
| singapore natl eye ctr             | 3 | 32715 | 57.2917  |
| sorbonne univ                      | 1 | 368   | 6        |
| southeast retina ctr               | 2 | 8651  | 388      |
| st louis univ                      | 2 | 2392  | 29.1429  |
| st thomas hosp                     | 1 | 4847  | 36.7619  |
| stanford univ                      | 1 | 15663 | 31.4565  |
| sun yat sen univ                   | 3 | 6362  | 23.5     |
| sunderland eye infirm              | 2 | 2392  | 7.25     |
| sungkyunkwan univ                  | 2 | 2786  | 5.8333   |
| taipei vet gen hosp                | 2 | 5760  | 24.8     |
| tan tock seng hosp                 | 3 | 4743  | 39.625   |
| tasmanian eye inst                 | 1 | 935   | 53.5     |
| tech univ dresden                  | 1 | 1139  | 39.8333  |
| technion israel inst technol       | 1 | 800   | 10       |
| tel aviv univ                      | 2 | 5672  | 19.7727  |
| texas retina associates            | 5 | 5622  | 102.25   |
| texas tech univ                    | 1 | 792   | 36.1667  |
| thomas jefferson univ              | 2 | 9213  | 41.4375  |



|                                 |   |       |          |
|---------------------------------|---|-------|----------|
| thorlabs inc                    | 1 | 1634  | 263      |
| tianjin med univ                | 1 | 1086  | 48.6667  |
| tilganga inst ophthalmol        | 1 | 916   | 14.5     |
| tohoku univ                     | 1 | 577   | 9.4286   |
| tokyo dent coll                 | 6 | 1026  | 41.3333  |
| tokyo womens med univ           | 1 | 1153  | 58       |
| topcon corp                     | 1 | 938   | 48.5     |
| tufts univ                      | 3 | 15618 | 98.3077  |
| tulane univ                     | 1 | 735   | 42.2     |
| ucl                             | 3 | 14116 | 47.8     |
| ucl inst ophthalmol             | 3 | 10802 | 28.1364  |
| univ aberdeen                   | 7 | 1537  | 35       |
| univ alabama birmingham         | 5 | 5963  | 65.25    |
| univ alberta                    | 4 | 2735  | 21.4     |
| univ alicante                   | 1 | 2534  | 60.1     |
| univ amsterdam                  | 2 | 6260  | 181.2222 |
| univ aquila                     | 5 | 1960  | 24.5     |
| univ arizona                    | 1 | 2433  | 104.7    |
| univ auckland                   | 1 | 1208  | 39       |
| univ autonoma barcelona         | 1 | 1378  | 124      |
| univ bari                       | 1 | 493   | 17       |
| univ basel                      | 3 | 3393  | 10.25    |
| univ bern                       | 5 | 5913  | 30.875   |
| univ birmingham                 | 1 | 462   | 29.75    |
| univ bologna                    | 1 | 575   | 8.5      |
| univ bonn                       | 2 | 17868 | 91.72    |
| univ bordeaux                   | 2 | 4837  | 48.8333  |
| univ brescia                    | 4 | 4427  | 20.5     |
| univ british columbia           | 1 | 1197  | 55       |
| univ calgary                    | 4 | 1800  | 36       |
| univ calif davis                | 1 | 4683  | 45.5385  |
| univ calif irvine               | 2 | 8112  | 28.8696  |
| univ calif los angeles          | 5 | 13103 | 43.325   |
| univ calif san diego            | 1 | 9385  | 44.6579  |
| univ calif san francisco        | 1 | 7590  | 44.3448  |
| univ cambridge                  | 3 | 1111  | 26.8     |
| univ cattolica sacro cuore      | 1 | 1360  | 52.8     |
| univ chicago                    | 2 | 2255  | 76       |
| univ cincinnati                 | 3 | 2581  | 67.5556  |
| univ coimbra                    | 2 | 2544  | 12       |
| univ cologne                    | 3 | 6242  | 25.2857  |
| univ colorado                   | 4 | 4988  | 20.875   |
| univ complutense                | 4 | 1846  | 29.75    |
| univ copenhagen                 | 2 | 5190  | 12.75    |
| univ crete                      | 1 | 2865  | 37       |
| univ dundee                     | 2 | 3445  | 22.375   |
| univ erlangen nurnberg          | 1 | 4248  | 95.7143  |
| univ essen gesamthsch           | 5 | 563   | 30.5     |
| univ eye hosp                   | 1 | 589   | 30.5     |
| univ fed sao paulo              | 6 | 14230 | 81.6471  |
| univ florida                    | 1 | 3493  | 42.2857  |
| univ frankfurt                  | 1 | 1284  | 41.1667  |
| univ freiburg                   | 3 | 4076  | 15.2857  |
| univ fukui                      | 3 | 1325  | 39.25    |
| univ g dannunzio                | 1 | 1418  | 18.4444  |
| univ geneva                     | 4 | 3191  | 49.1429  |
| univ genoa                      | 1 | 2084  | 64.5     |
| univ ghent                      | 5 | 260   | 14.75    |
| univ heidelberg                 | 1 | 1462  | 67.5     |
| univ helsinki                   | 1 | 4969  | 59.1905  |
| univ hong kong                  | 1 | 2360  | 23.1429  |
| univ hosp                       | 1 | 1804  | 34.4286  |
| univ hosp cologne               | 3 | 4275  | 49.4     |
| univ iceland                    | 2 | 1919  | 75       |
| univ illinois                   | 6 | 16557 | 38.4167  |
| univ ioannina                   | 4 | 6017  | 15.5556  |
| univ iowa                       | 5 | 1539  | 141.5    |
| univ iowa hosp & clin           | 2 | 201   | 14       |
| univ kentucky                   | 2 | 2624  | 151.6    |
| univ lausanne                   | 2 | 2965  | 48.1429  |
| univ leipzig                    | 2 | 2329  | 30       |
| univ liverpool                  | 2 | 3664  | 43.2857  |
| univ ljubljana                  | 1 | 96    | 12.6     |
| univ lubeck                     | 2 | 3258  | 7.6667   |
| univ lyon                       | 2 | 1590  | 21.4     |
| univ mainz                      | 1 | 605   | 36.25    |
| univ manchester                 | 2 | 2407  | 13.4     |
| univ marburg                    | 1 | 890   | 62.4     |
| univ maryland                   | 1 | 1620  | 72.3333  |
| univ med & dent new jersey      | 1 | 1016  | 47.4     |
| univ med ctr hamburg eppendorf  | 2 | 8582  | 149      |
| univ med ctr schleswig holstein | 2 | 1624  | 34       |
| univ melbourne                  | 5 | 18629 | 100.8065 |
| univ messina                    | 4 | 1401  | 25.25    |
| univ miami                      | 5 | 17296 | 45.6667  |
| univ michigan                   | 1 | 8738  | 40.3571  |
| univ miguel hernandez           | 1 | 2617  | 26.2727  |
| univ milan                      | 4 | 16527 | 43.7273  |
| univ minho                      | 2 | 2032  | 5.25     |
| univ minnesota                  | 1 | 1503  | 35.4286  |
| univ missouri                   | 2 | 2212  | 28.6667  |
| univ montreal                   | 4 | 2707  | 22.5455  |
| univ munich                     | 1 | 2998  | 15.2     |
| univ munster                    | 2 | 1117  | 63.25    |
| univ murcia                     | 1 | 1270  | 18       |
| univ nebraska med ctr           | 2 | 8595  | 67       |
| univ new s wales                | 3 | 1074  | 13.6     |
| univ new south wales            | 5 | 5583  | 30.4444  |
| univ nottingham                 | 3 | 3985  | 25.3333  |
| univ nottingham hosp            | 2 | 1273  | 22.1667  |
| univ oslo                       | 1 | 1115  | 68       |
| univ otago                      | 2 | 1847  | 24.75    |
| univ oviedo                     | 4 | 1475  | 22.5     |
| univ oxford                     | 2 | 3569  | 24.0909  |
| univ padua                      | 2 | 7291  | 135.8    |
| univ paris 06                   | 3 | 2222  | 32.3     |
| univ paris 07                   | 5 | 3836  | 105.3333 |
| univ paris est creteil          | 2 | 779   | 46.25    |
| univ paris saclay               | 4 | 1407  | 19.5     |

|                                             |   |       |          |
|---------------------------------------------|---|-------|----------|
| univ penn                                   | 5 | 11645 | 53.3636  |
| univ pittsburgh                             | 1 | 3877  | 42.8235  |
| univ porto                                  | 2 | 3841  | 3.8      |
| univ regensburg                             | 1 | 1597  | 37.5     |
| univ rochester                              | 1 | 3965  | 59.6667  |
| univ rome                                   | 1 | 895   | 25.75    |
| univ rostock                                | 6 | 2552  | 61.4     |
| univ saarland                               | 1 | 200   | 7.75     |
| univ sao paulo                              | 1 | 4945  | 30.4     |
| univ siena                                  | 1 | 547   | 14       |
| univ so calif                               | 1 | 9065  | 51.9655  |
| univ southern calif                         | 1 | 4278  | 15.6923  |
| univ st andrews                             | 3 | 1328  | 38.4     |
| univ sydney                                 | 5 | 19231 | 125.4706 |
| univ tehran med sci                         | 1 | 3118  | 16.125   |
| univ tennessee                              | 1 | 608   | 6.5      |
| univ texas                                  | 1 | 4267  | 31.88    |
| univ texas hlth sci ctr houston             | 1 | 978   | 13       |
| univ tokyo                                  | 1 | 3183  | 64.8571  |
| univ toronto                                | 4 | 9530  | 36.96    |
| univ tsukuba                                | 1 | 1900  | 51.8333  |
| univ tubingen                               | 3 | 4171  | 32.0909  |
| univ udine                                  | 2 | 2131  | 71.25    |
| univ ulsan                                  | 1 | 3839  | 84.8182  |
| univ ulster                                 | 1 | 1488  | 64.5     |
| univ utah                                   | 1 | 3305  | 31.8824  |
| univ valencia                               | 1 | 3637  | 27.5     |
| univ versailles st quentin en yvelines      | 1 | 1867  | 6        |
| univ vienna                                 | 1 | 4954  | 116.9032 |
| univ vita salute                            | 2 | 3618  | 401      |
| univ vita salute san raffaele               | 2 | 372   | 35.25    |
| univ warmia & mazury                        | 5 | 1351  | 7        |
| univ washington                             | 1 | 5519  | 38       |
| univ western australia                      | 5 | 6719  | 87.3636  |
| univ western ontario                        | 4 | 2423  | 11.5     |
| univ wisconsin                              | 5 | 13722 | 72.9545  |
| univ zaragoza                               | 1 | 637   | 21.75    |
| univ zurich                                 | 1 | 3026  | 108.9333 |
| us fda                                      | 1 | 425   | 36.25    |
| usn                                         | 1 | 1378  | 54.25    |
| vanderbilt univ                             | 1 | 8493  | 32       |
| vissum inst oftalmol alicante               | 1 | 941   | 24.25    |
| vitreous retina macula consultants new york | 2 | 9135  | 160      |
| vivantes klinikum neukolln                  | 1 | 939   | 58.5     |
| vrije univ amsterdam                        | 2 | 2477  | 36.5     |
| washington univ                             | 6 | 10684 | 52.6429  |
| wayne state univ                            | 1 | 1035  | 38.4286  |
| weill cornell med coll                      | 2 | 5238  | 21.6667  |
| wenzhou med univ                            | 1 | 995   | 4.3333   |
| william beaumont hosp                       | 1 | 630   | 27.8     |
| wills eye hosp & res inst                   | 2 | 11569 | 83.5417  |
| wilmer eye inst                             | 3 | 2771  | 91.2     |
| vale univ                                   | 2 | 3282  | 26.875   |
| yamaguchi univ                              | 1 | 487   | 40.8     |
| yonsei univ                                 | 1 | 4732  | 47.15    |

---

**Supplementary Table 5. Average citations and total link strength of authors per cluster based on bibliographic coupling analysis (Journals) .**

| Journals                                                       | Cluster | Total Link Strength | Avg. citations |
|----------------------------------------------------------------|---------|---------------------|----------------|
| acs applied bio materials                                      | 1       | 29                  | 4              |
| acs applied polymer materials                                  | 3       | 8                   | 2              |
| acs nano                                                       | 2       | 52                  | 16             |
| acta clinica croatica                                          | 3       | 301                 | 8              |
| acta medica portuguesa                                         | 2       | 482                 | 0              |
| acta ophthalmologica                                           | 3       | 3092                | 15.6           |
| acta ophthalmologica scandinavica                              | 2       | 1853                | 35.5           |
| acta paediatrica                                               | 2       | 45                  | 13             |
| acta physica polonica a                                        | 1       | 281                 | 3              |
| acta scientiae veterinariae                                    | 5       | 13                  | 0              |
| actas dermo-sifiliograficas                                    | 4       | 1                   | 0              |
| acupuncture in medicine                                        | 2       | 10                  | 7              |
| advanced healthcare materials                                  | 4       | 65                  | 0              |
| advanced materials                                             | 1       | 118                 | 21.5           |
| advanced optical technologies                                  | 1       | 886                 | 0.3333         |
| advances in anatomic pathology                                 | 1       | 16                  | 30             |
| advances in clinical and experimental medicine                 | 2       | 267                 | 3              |
| advances in therapy                                            | 3       | 3090                | 17.7778        |
| american family physician                                      | 3       | 554                 | 37             |
| american journal of health-system pharmacy                     | 3       | 160                 | 174            |
| american journal of nephrology                                 | 2       | 201                 | 17             |
| american journal of occupational therapy                       | 1       | 4                   | 21             |
| american journal of ophthalmology                              | 3       | 5895                | 61.1111        |
| american journal of perinatology                               | 2       | 114                 | 7              |
| american journal of primatology                                | 3       | 53                  | 0              |
| analyst                                                        | 1       | 62                  | 4              |
| analytical methods                                             | 4       | 25                  | 9              |
| angiogenesis                                                   | 2       | 134                 | 53             |
| annales chirurgiae et gynaecologiae                            | 7       | 0                   | 9              |
| annales de dermatologie et de venerologie                      | 8       | 0                   | 3              |
| annales de physique                                            | 1       | 31                  | 0              |
| annals academy of medicine singapore                           | 2       | 66                  | 24             |
| annals of medicine                                             | 3       | 419                 | 429            |
| annals of medicine and surgery                                 | 3       | 33                  | 0              |
| annals of ophthalmology                                        | 9       | 0                   | 7              |
| annals of ophthalmology-glaucoma                               | 1       | 20                  | 0              |
| annals of pharmacotherapy                                      | 2       | 194                 | 6              |
| annals of the new york academy of sciences                     | 1       | 20                  | 7              |
| annual review of vision science, vol 2                         | 1       | 712                 | 6              |
| applied optics                                                 | 1       | 740                 | 40.5           |
| applied sciences-basel                                         | 4       | 223                 | 1              |
| applied surface science                                        | 1       | 237                 | 10             |
| archives of disease in childhood-fetal and neonatal<br>edition | 2       | 479                 | 32.6667        |
| archives of medical research                                   | 2       | 167                 | 3              |
| archives of ophthalmology                                      | 3       | 1623                | 199.7778       |
| archivos argentinos de pediatria                               | 10      | 0                   | 2              |
| arquivos brasileiros de oftalmologia                           | 3       | 580                 | 2.2222         |
| artificial cells nanomedicine and biotechnology                | 4       | 3                   | 35             |
| asia-pacific journal of ophthalmology                          | 3       | 397                 | 12             |
| augenheilkunde up2date                                         | 2       | 586                 | 0              |
| australian and new zealand journal of<br>ophthalmology         | 2       | 68                  | 21             |
| australian and new zealand journal of public health            | 2       | 156                 | 6              |
| australian journal of primary health                           | 2       | 65                  | 2              |
| aviation space and environmental medicine                      | 1       | 25                  | 2              |
| berliner und munchener tierarztliche wochenschrift             | 1       | 51                  | 0              |
| bio-medical materials and engineering                          | 1       | 25                  | 28             |
| biochemistry-moscow                                            | 4       | 83                  | 7              |
| biochimica et biophysica acta-molecular basis of<br>disease    | 4       | 4                   | 11             |
| biomaterials                                                   | 2       | 45                  | 37             |
| biomed research international                                  | 2       | 231                 | 10.6667        |
| biomedical engineering online                                  | 1       | 614                 | 25             |
| biomedical engineering-meditinskaya teknika                    | 1       | 1                   | 0              |
| biomedical microdevices                                        | 11      | 0                   | 39             |
| biomedical optics express                                      | 1       | 2243                | 37.3333        |
| biomedizinische technik                                        | 1       | 18                  | 11             |
| biomolecules                                                   | 4       | 32                  | 0              |
| biophysical journal                                            | 1       | 43                  | 587            |
| bmc medicine                                                   | 2       | 455                 | 33             |
| bmc ophthalmology                                              | 4       | 1485                | 7.4286         |
| bmj case reports                                               | 2       | 134                 | 0.0769         |
| bmj open                                                       | 3       | 306                 | 10.8           |
| bmj open diabetes research & care                              | 2       | 89                  | 0              |
| bmj open ophthalmology                                         | 2       | 421                 | 0              |
| bmj paediatrics open                                           | 2       | 78                  | 2              |
| british journal of hospital medicine                           | 2       | 178                 | 0              |
| british journal of ophthalmology                               | 3       | 3468                | 33.5           |
| bulletin de l academie veterinaire de france                   | 5       | 49                  | 0              |
| bulletin of experimental biology and medicine                  | 2       | 13                  | 1              |
| bulletin of the world health organization                      | 2       | 22                  | 11             |
| canadian family physician                                      | 12      | 0                   | 0              |
| canadian journal of diabetes                                   | 2       | 62                  | 2              |
| canadian journal of neurological sciences                      | 13      | 0                   | 0              |

|                                                    |    |      |         |
|----------------------------------------------------|----|------|---------|
| canadian journal of ophthalmology-journal          | 3  | 528  | 10.1579 |
| canadien d ophthalmologie                          |    |      |         |
| case reports in infectious diseases                | 4  | 5    | 3       |
| cataract                                           | 3  | 272  | 1       |
| cataract surgery from routine to complex : a       | 3  | 481  | 0       |
| practical guide                                    |    |      |         |
| cell death & disease                               | 2  | 18   | 46      |
| cell transplantation                               | 2  | 44   | 56      |
| chemicke listy                                     | 1  | 13   | 3       |
| chinese journal of lasers-zhongguo jiguang         | 1  | 727  | 2.3333  |
| chinese medical journal                            | 1  | 4    | 0       |
| chinese optics letters                             | 1  | 1    | 3       |
| clinica chimica acta                               | 4  | 7    | 34      |
| clinica terapeutica                                | 2  | 102  | 8       |
| clinica veterinaria de pequenos animales           | 5  | 22   | 0       |
| clinical and experimental ophthalmology            | 2  | 2824 | 31.4706 |
| clinical and experimental optometry                | 3  | 1064 | 13.6    |
| clinical epidemiology                              | 3  | 151  | 2       |
| clinical interventions in aging                    | 4  | 4    | 34      |
| clinical ophthalmology                             | 4  | 3216 | 3.32    |
| clinical otolaryngology                            | 3  | 39   | 23.5    |
| clinical vision sciences                           | 2  | 90   | 20      |
| clinics in dermatology                             | 3  | 12   | 42      |
| clinics in geriatric medicine                      | 2  | 301  | 0       |
| cns & neurological disorders-drug targets          | 4  | 292  | 46      |
| cochrane database of systematic reviews            | 3  | 267  | 8.2     |
| collegium antropologicum                           | 3  | 131  | 4       |
| colloids and surfaces a-physicochemical and        | 4  | 80   | 2       |
| engineering aspects                                |    |      |         |
| colloids and surfaces b-biointerfaces              | 4  | 34   | 13      |
| comparative medicine                               | 1  | 108  | 3       |
| compendium on continuing education for the         | 14 | 0    | 3       |
| practicing veterinarian                            |    |      |         |
| computers in biology and medicine                  | 1  | 182  | 2       |
| contact lens & anterior eye                        | 4  | 1044 | 20.6667 |
| cornea                                             | 4  | 2431 | 38      |
| corneal regeneration: methods and protocols        | 4  | 8    | 1       |
| cureus                                             | 4  | 246  | 1       |
| cureus journal of medical science                  | 3  | 47   | 0       |
| current diabetes reports                           | 2  | 302  | 1       |
| current drug safety                                | 2  | 925  | 0       |
| current eye research                               | 4  | 1465 | 26.6    |
| current medical research and opinion               | 2  | 588  | 10      |
| current molecular medicine                         | 2  | 34   | 1       |
| current neurovascular research                     | 2  | 6    | 3       |
| current ophthalmology reports                      | 3  | 76   | 0       |
| current opinion in allergy and clinical immunology | 4  | 333  | 22      |
| current opinion in neurology                       | 3  | 14   | 7       |
| current opinion in ophthalmology                   | 4  | 2707 | 33.8889 |
| current pharmaceutical biotechnology               | 2  | 224  | 42      |
| dermatologic clinics                               | 15 | 0    | 11      |
| devices and methods of measurements                | 16 | 0    | 0       |
| diabetes                                           | 2  | 408  | 41      |
| diabetes & vascular disease research               | 2  | 87   | 23      |
| diabetes care                                      | 2  | 424  | 56.3333 |
| diabetes mellitus                                  | 2  | 500  | 0       |
| diabetes research and clinical practice            | 2  | 99   | 42      |
| diabetes retinopathy                               | 2  | 104  | 0       |
| diabetes-metabolism research and reviews           | 2  | 133  | 0       |
| diabetic medicine                                  | 2  | 641  | 22.2857 |
| diabetologia                                       | 2  | 242  | 26      |
| diagnostics                                        | 4  | 275  | 13      |
| dose-response                                      | 4  | 45   | 23      |
| drug delivery                                      | 2  | 21   | 3       |
| drug delivery and translational research           | 2  | 25   | 0       |
| drugs                                              | 4  | 106  | 34      |
| drugs & aging                                      | 3  | 65   | 50      |
| early human development                            | 2  | 290  | 9       |
| endocrine                                          | 2  | 383  | 47      |
| endocrinology and metabolism clinics of north      | 2  | 468  | 20      |
| america                                            |    |      |         |
| endocrinology diabetes and metabolism case         | 17 | 0    | 0       |
| reports                                            |    |      |         |
| engineering research express                       | 1  | 21   | 1       |
| equine veterinary journal                          | 5  | 12   | 0       |
| european archives of oto-rhino-laryngology         | 3  | 27   | 7       |
| european journal of clinical microbiology &        | 2  | 12   | 5       |
| infectious diseases                                |    |      |         |
| european journal of medical research               | 3  | 259  | 7       |
| european journal of ophthalmology                  | 2  | 1596 | 9       |
| european journal of pharmaceutical sciences        | 3  | 40   | 9       |
| european journal of pharmaceuticals and            | 2  | 162  | 6       |
| biopharmaceutics                                   |    |      |         |
| experimental and molecular medicine                | 2  | 22   | 0       |
| experimental and therapeutic medicine              | 2  | 28   | 1.5     |
| experimental eye research                          | 4  | 780  | 8.1429  |
| expert opinion on drug safety                      | 3  | 254  | 43      |
| expert review of clinical pharmacology             | 2  | 80   | 39      |

|                                                                          |    |      |         |
|--------------------------------------------------------------------------|----|------|---------|
| expert review of medical devices                                         | 1  | 1015 | 8.3333  |
| expert review of ophthalmology                                           | 2  | 785  | 1.3333  |
| eye                                                                      | 2  | 4314 | 17.1143 |
| eye & contact lens-science and clinical practice                         | 4  | 1869 | 20      |
| eye and vision                                                           | 3  | 264  | 15.6    |
| folia morphologica                                                       | 3  | 6    | 3       |
| free radical biology and medicine                                        | 4  | 30   | 136     |
| fresenius environmental bulletin                                         | 18 | 0    | 2       |
| frontiers in medicine                                                    | 3  | 476  | 2.2     |
| frontiers in pharmacology                                                | 2  | 170  | 1       |
| frontiers in surgery                                                     | 2  | 10   | 13      |
| frontiers of optoelectronics                                             | 6  | 4    | 2       |
| gazette medicale de france                                               | 19 | 0    | 0       |
| geriatrics-us                                                            | 2  | 206  | 3       |
| gland surgery                                                            | 1  | 19   | 68      |
| glaucoma surgery                                                         | 5  | 100  | 3       |
| glaucoma surgery, 2nd revised and extended edition                       | 5  | 107  | 3       |
| gomal journal of medical sciences                                        | 1  | 9    | 0       |
| graeefes archive for clinical and experimental ophthalmology             | 4  | 1484 | 22.5789 |
| hand clinics                                                             | 1  | 1    | 4       |
| handbook of solid-state lasers: materials, systems and applications      | 1  | 226  | 0       |
| health informatics journal                                               | 2  | 2    | 0       |
| health technology assessment                                             | 3  | 1035 | 9.3333  |
| hematology-oncology clinics of north america                             | 2  | 20   | 20      |
| herald of the russian academy of sciences                                | 20 | 0    | 0       |
| high-power and femosecond lasers: properties, materials and applications | 3  | 13   | 0       |
| hormone and metabolic research                                           | 4  | 5    | 30      |
| human molecular genetics                                                 | 1  | 7    | 46      |
| iee engineering in medicine and biology magazine                         | 1  | 119  | 4       |
| iee journal of biomedical and health informatics                         | 1  | 42   | 36      |
| iee journal of quantum electronics                                       | 1  | 32   | 6       |
| iee journal of selected topics in quantum electronics                    | 1  | 1058 | 37.4    |
| iee photonics journal                                                    | 1  | 103  | 5       |
| iee transactions on biomedical engineering                               | 1  | 254  | 9.5     |
| iee transactions on information technology in biomedicine                | 1  | 28   | 53      |
| iee transactions on medical imaging                                      | 1  | 330  | 84      |
| iee transactions on plasma science                                       | 1  | 72   | 29      |
| ium medical journal malaysia                                             | 3  | 32   | 0       |
| image modeling of the human eye                                          | 3  | 432  | 3       |
| impact of science on society                                             | 1  | 17   | 0       |
| in vivo                                                                  | 4  | 165  | 12      |
| indian journal of ophthalmology                                          | 4  | 1812 | 8.5714  |
| indian journal of pediatrics                                             | 2  | 150  | 5       |
| infants and young children                                               | 1  | 30   | 12      |
| infrared imaging: a casebook in clinical medicine                        | 1  | 3    | 0       |
| infrared physics                                                         | 1  | 103  | 0       |
| interactive cardiovascular and thoracic surgery                          | 4  | 3    | 7       |
| international archives of allergy and immunology                         | 4  | 4    | 5       |
| international journal for vitamin and nutrition research                 | 2  | 49   | 2       |
| international journal of clinical and experimental medicine              | 3  | 15   | 0       |
| international journal of fertility and womens medicine                   | 3  | 112  | 1       |
| international journal of hyperthermia                                    | 3  | 183  | 33      |
| international journal of medical sciences                                | 4  | 260  | 7.5     |
| international journal of molecular sciences                              | 4  | 607  | 2       |
| international journal of multiphase flow                                 | 1  | 21   | 12      |
| international journal of ophthalmology                                   | 4  | 688  | 10.7    |
| international journal of oral and maxillofacial surgery                  | 21 | 0    | 6       |
| international journal of pharmaceuticals                                 | 22 | 0    | 284     |
| international journal of retina and vitreous                             | 2  | 72   | 9       |
| international journal of thermal sciences                                | 1  | 115  | 0       |
| international medical case reports journal                               | 4  | 65   | 3.5     |
| international ophthalmology                                              | 3  | 847  | 6.6364  |
| international ophthalmology clinics                                      | 23 | 0    | 7.5     |
| investigative ophthalmology & visual science                             | 4  | 3858 | 45.8649 |
| iranian journal of ophthalmology                                         | 3  | 203  | 1       |
| irbm                                                                     | 1  | 75   | 0.5     |
| irish journal of medical science                                         | 2  | 7    | 0       |
| iscience                                                                 | 1  | 33   | 27      |
| izvestiya akademii nauk sssr seriya fizicheskaya                         | 1  | 43   | 3.4     |
| jama ophthalmology                                                       | 2  | 1775 | 29.5556 |
| jama-journal of the american medical association                         | 2  | 928  | 143.25  |
| japanese journal of applied physics                                      | 1  | 30   | 14      |
| japanese journal of applied physics part 1-regular                       | 24 | 0    | 1       |
| papers short notes & japanese journal of ophthalmology                   | 2  | 1026 | 10.8    |
| jco global oncology                                                      | 3  | 15   | 1       |
| jcp-sp-journal of the college of physicians and surgeons pakistan        | 2  | 876  | 6.4615  |



|                                                                          |    |       |         |
|--------------------------------------------------------------------------|----|-------|---------|
| johns hopkins apl technical digest                                       | 25 | 0     | 2       |
| journal francais d ophthalmologie                                        | 3  | 2658  | 4.2857  |
| journal of aapos                                                         | 3  | 141   | 17.8    |
| journal of advanced research                                             | 4  | 99    | 8       |
| journal of allergy and clinical immunology                               | 4  | 21    | 29      |
| journal of alternative and complementary medicine                        | 4  | 99    | 1       |
| journal of analytical atomic spectrometry                                | 6  | 7     | 7       |
| journal of applied polymer science                                       | 4  | 1     | 13      |
| journal of biochemistry                                                  | 2  | 153   | 6       |
| journal of biomedical optics                                             | 1  | 4842  | 39.1316 |
| journal of biophotonics                                                  | 1  | 484   | 19.1667 |
| journal of cataract and refractive surgery                               | 3  | 38553 | 32.413  |
| journal of clinical and diagnostic research                              | 2  | 55    | 10      |
| journal of clinical endocrinology & metabolism                           | 2  | 28    | 0       |
| journal of clinical investigation                                        | 4  | 18    | 167     |
| journal of clinical medicine                                             | 4  | 774   | 0.875   |
| journal of controlled release                                            | 2  | 55    | 29      |
| journal of current ophthalmology                                         | 3  | 1511  | 6.8     |
| journal of dental research                                               | 4  | 15    | 79      |
| journal of drug delivery science and technology                          | 1  | 47    | 7.5     |
| journal of emergency medicine                                            | 2  | 1     | 0       |
| journal of equine veterinary science                                     | 5  | 11    | 0       |
| journal of evolution of medical and dental sciences-<br>jemds            | 2  | 500   | 0       |
| journal of family medicine and primary care                              | 2  | 30    | 3       |
| journal of glaucoma                                                      | 3  | 2818  | 19.6786 |
| journal of hospital infection                                            | 1  | 5     | 15      |
| journal of imaging                                                       | 1  | 100   | 13      |
| journal of korean medical science                                        | 2  | 510   | 6       |
| journal of laser applications                                            | 1  | 2     | 1       |
| journal of laser micro nanoengineering                                   | 1  | 124   | 2       |
| journal of lasers in medical sciences                                    | 1  | 29    | 23      |
| journal of mechanics in medicine and biology                             | 1  | 10    | 15      |
| journal of medical biography                                             | 3  | 4     | 0       |
| journal of medical case reports                                          | 3  | 43    | 0       |
| journal of medical engineering & technology                              | 3  | 29    | 36      |
| journal of medical imaging                                               | 3  | 101   | 0       |
| journal of medical imaging and health informatics                        | 4  | 1     | 1       |
| journal of medical screening                                             | 2  | 202   | 5       |
| journal of medical systems                                               | 1  | 83    | 11      |
| journal of medicinal chemistry                                           | 2  | 678   | 20      |
| journal of modern optics                                                 | 1  | 211   | 7.6667  |
| journal of nanomaterials                                                 | 4  | 2     | 0       |
| journal of neuro-ophthalmology                                           | 3  | 168   | 14.6667 |
| journal of neuroscience methods                                          | 4  | 12    | 17      |
| journal of nutritional biochemistry                                      | 2  | 125   | 39      |
| journal of ocular pharmacology and therapeutics                          | 2  | 426   | 17.6667 |
| journal of ophthalmology                                                 | 4  | 2491  | 8.7273  |
| journal of optical technology                                            | 1  | 291   | 1       |
| journal of optics                                                        | 1  | 25    | 0       |
| journal of optoelectronics and advanced materials                        | 26 | 0     | 0       |
| journal of pediatric ophthalmology & strabismus                          | 1  | 221   | 7.3333  |
| journal of pharmaceutical research international                         | 2  | 378   | 0       |
| journal of photochemistry and photobiology a-<br>chemistry               | 1  | 6     | 22      |
| journal of physics d-applied physics                                     | 1  | 213   | 7       |
| journal of postgraduate medicine                                         | 2  | 310   | 47      |
| journal of refractive surgery                                            | 3  | 1331  | 29.7143 |
| journal of research in medical sciences                                  | 3  | 371   | 3       |
| journal of telemedicine and telecare                                     | 3  | 27    | 36      |
| journal of the american academy of dermatology                           | 4  | 8     | 3       |
| journal of the american animal hospital association                      | 5  | 22    | 7       |
| journal of the franklin institute-engineering and<br>applied mathematics | 27 | 0     | 0       |
| journal of the korean ophthalmological society                           | 4  | 284   | 0       |
| journal of the mechanical behavior of biomedical<br>materials            | 3  | 55    | 29      |
| journal of the national medical association                              | 3  | 140   | 6.5     |
| journal of the optical society of korea                                  | 1  | 318   | 6.5     |
| journal of the pakistan medical association                              | 2  | 111   | 1.6667  |
| journal of the royal society interface                                   | 1  | 5     | 19      |
| journal of thermal biology                                               | 1  | 24    | 14      |
| journal of toxicology-cutaneous and ocular<br>toxicology                 | 3  | 123   | 8       |
| jove-journal of visualized experiments                                   | 1  | 239   | 5.6667  |
| kaohsiung journal of medical sciences                                    | 2  | 117   | 4       |
| khyber medical university journal-knuj                                   | 2  | 63    | 0       |
| klinische monatsblatter fur augenheilkunde                               | 3  | 1379  | 4.6522  |
| kvantovaya elektronika                                                   | 1  | 3     | 0       |
| lab on a chip                                                            | 2  | 147   | 0       |
| lancet                                                                   | 2  | 958   | 280.2   |
| lancet digital health                                                    | 2  | 64    | 4       |
| laser & optoelectronics progress                                         | 1  | 19    | 2       |
| laser & photonics reviews                                                | 4  | 51    | 26      |
| laser focus world                                                        | 1  | 36    | 1       |
| laser focus-electro-optics                                               | 28 | 0     | 4       |
| laser physics                                                            | 1  | 480   | 7.6     |
| laser physics letters                                                    | 1  | 83    | 10      |

|                                                                        |    |       |          |
|------------------------------------------------------------------------|----|-------|----------|
| laser treatment of vascular lesions                                    | 1  | 49    | 1        |
| lasers for medical applications: diagnostics,<br>therapy and surgery   | 1  | 250   | 2        |
| lasers in engineering                                                  | 3  | 2     | 0        |
| lasers in medical science                                              | 1  | 393   | 8.7143   |
| lasers in surgery and medicine                                         | 1  | 2063  | 21.5     |
| life-basel                                                             | 4  | 57    | 0        |
| light-science & applications                                           | 1  | 59    | 16       |
| liver international                                                    | 1  | 10    | 28       |
| m s-medecine sciences                                                  | 1  | 212   | 7        |
| macular edema: a practical approach                                    | 2  | 113   | 12       |
| magyar allatorvosok lapja                                              | 5  | 3     | 0        |
| major topics in type 1 diabetes                                        | 2  | 433   | 1        |
| maternal and child health journal                                      | 2  | 74    | 10       |
| matrix biology                                                         | 4  | 9     | 46       |
| medecine et armees                                                     | 29 | 0     | 1        |
| medical decision making                                                | 3  | 53    | 10       |
| medical engineering & physics                                          | 2  | 23    | 5        |
| medical journal of australia                                           | 2  | 232   | 8        |
| medical science                                                        | 2  | 194   | 1        |
| medical science monitor                                                | 3  | 155   | 3.5      |
| medicina clinica                                                       | 1  | 108   | 0        |
| medicina-lithuania                                                     | 4  | 688   | 3.4286   |
| medicine                                                               | 2  | 455   | 7.6      |
| medicine and health                                                    | 4  | 1     | 0        |
| medizinische klinik                                                    | 2  | 140   | 3        |
| medizinische welt                                                      | 30 | 0     | 0        |
| medycyna weterynaryjna-veterinary medicine-<br>science and practice    | 5  | 11    | 0        |
| micromachines                                                          | 1  | 666   | 9        |
| middle east african journal of ophthalmology                           | 3  | 9     | 4        |
| military medicine                                                      | 3  | 88    | 1.3333   |
| minerva biotecnologica                                                 | 1  | 407   | 16       |
| minimally invasive therapy & allied technologies                       | 31 | 0     | 0        |
| molecular genetics & genomic medicine                                  | 3  | 93    | 3        |
| molecular vision                                                       | 4  | 378   | 27.6667  |
| munchener medizinische wochenschrift                                   | 32 | 0     | 0        |
| nature photonics                                                       | 1  | 107   | 150      |
| neonatal network                                                       | 33 | 0     | 0        |
| nepalese journal of ophthalmology                                      | 2  | 143   | 4        |
| nephron                                                                | 3  | 1     | 6        |
| neurology                                                              | 4  | 1     | 25       |
| neuroscience and biobehavioral reviews                                 | 1  | 54    | 29       |
| new trends in basic and clinical research of<br>glaucoma: a            | 3  | 85    | 27       |
| new zealand medical journal                                            | 2  | 40    | 12       |
| nigerian postgraduate medical journal                                  | 2  | 13    | 6        |
| nobel medicus                                                          | 3  | 25    | 0        |
| nonlinear analysis-real world applications                             | 3  | 12    | 6        |
| nuclear technology & radiation protection                              | 1  | 27    | 1        |
| nursing clinics of north america                                       | 3  | 7     | 0        |
| nutrients                                                              | 4  | 108   | 7        |
| occupational medicine-oxford                                           | 4  | 3     | 3        |
| ocular fluid dynamics: anatomy, physiology,<br>imaging techniques, and | 1  | 84    | 3        |
| ocular immunology and inflammation                                     | 4  | 381   | 1.5      |
| ocular surface                                                         | 4  | 4075  | 54.8182  |
| oncology letters                                                       | 1  | 3     | 50       |
| open medicine                                                          | 2  | 2     | 3        |
| open ophthalmology journal                                             | 4  | 126   | 1.75     |
| ophthalmic and physiological optics                                    | 2  | 185   | 11       |
| ophthalmic epidemiology                                                | 2  | 552   | 5.5714   |
| ophthalmic plastic and reconstructive surgery                          | 4  | 5     | 32       |
| ophthalmic research                                                    | 4  | 603   | 8.4286   |
| ophthalmic surgery and lasers                                          | 1  | 149   | 8        |
| ophthalmic surgery lasers & imaging                                    | 3  | 248   | 10       |
| ophthalmic surgery lasers & imaging retina                             | 2  | 794   | 8.1667   |
| ophthalmologe                                                          | 3  | 2844  | 8.2667   |
| ophthalmologica                                                        | 2  | 1944  | 19.3529  |
| ophthalmologie                                                         | 3  | 304   | 0        |
| ophthalmology                                                          | 3  | 63781 | 72.9111  |
| ophthalmology and therapy                                              | 2  | 675   | 8        |
| ophthalmology glaucoma                                                 | 3  | 2370  | 4.5714   |
| ophthalmology retina                                                   | 2  | 6885  | 7.4355   |
| optica                                                                 | 1  | 26    | 20       |
| optica acta                                                            | 1  | 8     | 2        |
| optical engineering                                                    | 1  | 1354  | 40.0833  |
| optical materials                                                      | 4  | 49    | 2        |
| optics and laser technology                                            | 1  | 118   | 15.6     |
| optics and lasers in engineering                                       | 1  | 184   | 14       |
| optics express                                                         | 1  | 557   | 161.3333 |
| optics letters                                                         | 1  | 55    | 29.3333  |
| optik                                                                  | 2  | 20    | 4        |
| optometry and vision science                                           | 4  | 433   | 12.3333  |
| oral oncology                                                          | 1  | 10    | 1        |
| orbit-an international journal on orbital disorders<br>and facial      | 1  | 1     | 4        |
| orvosi hetilap                                                         | 3  | 77    | 5        |

|                                                     |    |      |          |
|-----------------------------------------------------|----|------|----------|
| otolaryngologic clinics of north america            | 3  | 9    | 5        |
| otolaryngology-head and neck surgery                | 1  | 1    | 0        |
| oxidative medicine and cellular longevity           | 2  | 313  | 66       |
| pain physician                                      | 4  | 185  | 16       |
| pakistan journal of medical & health sciences       | 1  | 28   | 0        |
| pakistan journal of medical sciences                | 2  | 1013 | 2.3333   |
| pathogens                                           | 34 | 0    | 2        |
| patient preference and adherence                    | 2  | 256  | 12       |
| pattern recognition                                 | 1  | 5    | 36       |
| pediatric neurology                                 | 3  | 4    | 11       |
| periodicum biologorum                               | 3  | 32   | 0        |
| periostin                                           | 4  | 26   | 2        |
| pferdeheilkunde                                     | 5  | 29   | 0.8      |
| pharmacoeconomics                                   | 3  | 124  | 41       |
| philosophical transactions of the royal society a-  | 1  | 16   | 38       |
| mathematical physical                               | 1  | 169  | 2        |
| photoacoustic probes for in vivo imaging            | 1  | 102  | 0        |
| photoacoustics                                      | 1  | 112  | 15.5     |
| photobiomodulation photomedicine and laser          | 4  | 181  | 118.5    |
| surgery                                             | 1  | 458  | 1        |
| photochemical & photobiological sciences            | 1  | 3    | 18       |
| photonics                                           | 1  | 0    | 0        |
| photonics research                                  | 35 | 391  | 36       |
| photonics spectra                                   | 1  | 64   | 40       |
| physics in medicine and biology                     | 1  | 18   | 4        |
| physiological measurement                           | 4  | 1696 | 17.6154  |
| physiotherapy theory and practice                   | 4  | 0    | 0        |
| plos one                                            | 36 | 163  | 2        |
| polymer international                               | 1  | 155  | 0        |
| polymers                                            | 2  | 317  | 14       |
| postgraduate medicine                               | 1  | 35   | 3        |
| proceedings of the ieee                             | 3  | 226  | 56.5     |
| proceedings of the institution of mechanical        | 1  | 19   | 0        |
| engineers part h-journal of                         | 1  | 35   | 39       |
| proceedings of the national academy of sciences of  | 1  | 4793 | 108.5556 |
| the united states of                                | 4  | 4    | 1        |
| proceedings of the society of photo-optical         | 1  | 98   | 1        |
| instrumentation engineers                           | 1  | 148  | 7.5      |
| progress in quantum electronics                     | 3  | 49   | 0        |
| progress in retinal and eye research                | 2  | 64   | 9        |
| pteridines                                          | 1  | 710  | 801.5    |
| quantitative imaging in medicine and surgery        | 3  | 1532 | 17.6471  |
| quantum electronics                                 | 1  | 64   | 77       |
| radiation effects and defects in solids             | 3  | 917  | 1.75     |
| regional anesthesia and pain medicine               | 1  | 6    | 0        |
| reports on progress in physics                      | 3  | 5    | 0        |
| retina-the journal of retinal and vitreous diseases | 2  | 0    | 0        |
| review of scientific instruments                    | 37 | 0    | 0        |
| revista brasileira de oftalmologia                  | 38 | 0    | 0        |
| revista de la universidad del zulia                 | 1  | 273  | 1        |
| revista orl                                         | 4  | 15   | 27       |
| revue de medecine                                   | 2  | 19   | 0        |
| revue de medecine de toulouse                       | 2  | 56   | 1        |
| revue de medecine interne                           | 2  | 7    | 6        |
| rsc advances                                        | 2  | 35   | 2        |
| sage open medical case reports                      | 2  | 85   | 0.6667   |
| sage open medicine                                  | 3  | 146  | 3        |
| salud i ciencia                                     | 39 | 0    | 22       |
| saudi journal of medicine & medical sciences        | 3  | 75   | 0        |
| saudi journal of ophthalmology                      | 3  | 483  | 11.1667  |
| saudi medical journal                               | 2  | 2929 | 16.2727  |
| scanning                                            | 40 | 0    | 14       |
| science and engineering ethics                      | 1  | 399  | 76       |
| scientific reports                                  | 2  | 135  | 2        |
| seminars in ophthalmology                           | 2  | 5    | 8        |
| seminars in veterinary medicine and surgery-small   | 1  | 64   | 83       |
| animal                                              | 41 | 0    | 0        |
| sensors                                             | 2  | 227  | 6        |
| simulation                                          | 6  | 7    | 0        |
| slas discovery                                      | 1  | 262  | 0.5      |
| solid-state mid-infrared laser sources              | 3  | 6    | 0        |
| south african journal of surgery                    | 4  | 45   | 0        |
| southern medical journal                            | 3  | 9    | 22       |
| spectroscopy and spectral analysis                  | 3  | 91   | 36       |
| spektrum der augenheilkunde                         | 3  | 10   | 37       |
| springer handbook of medical technology             | 1  | 49   | 1        |
| stem cells - from hype to real hope                 | 1  | 22   | 23       |
| stroke                                              | 3  | 2764 | 73.65    |
| surgeon-journal of the royal colleges of surgeons   | 3  | 4    | 15       |
| of edinburgh and                                    | 3  | 448  | 2        |
| surgical and radiologic anatomy                     | 2  | 23   | 12       |
| surgical clinics of north america                   | 1  | 14   | 6        |
| surgical neurology                                  | 3  | 14   | 6        |
| survey of ophthalmology                             | 3  | 14   | 6        |
| swiss medical weekly                                | 3  | 14   | 6        |
| taiwan journal of ophthalmology                     | 3  | 14   | 6        |
| talanta                                             | 2  | 14   | 6        |
| technology and health care                          | 1  | 14   | 6        |

|                                                                      |    |      |         |
|----------------------------------------------------------------------|----|------|---------|
| telemedicine journal                                                 | 42 | 0    | 23      |
| telemedicine journal and e-health                                    | 2  | 4    | 34      |
| texas medicine                                                       | 43 | 0    | 0       |
| therapeutic advances in endocrinology and metabolism                 | 2  | 154  | 31      |
| therapeutic advances in ophthalmology                                | 1  | 746  | 1.5     |
| therapeutische umschau                                               | 44 | 0    | 0       |
| tieraerztliche praxis ausgabe grosstiere nutztiere                   | 5  | 1    | 0       |
| tieraerztliche praxis ausgabe kleintiere heimtiere                   | 5  | 44   | 1       |
| tierarztliche praxis                                                 | 5  | 24   | 3       |
| transactions of the ophthalmological societies of the united kingdom | 1  | 12   | 16      |
| translational vision science & technology                            | 2  | 474  | 1.8333  |
| transplantation proceedings                                          | 4  | 33   | 7       |
| trauma monthly                                                       | 2  | 6    | 0       |
| trials                                                               | 3  | 375  | 14      |
| turk pediatri arsivi-turkish archives of pediatrics                  | 2  | 104  | 0       |
| turkiye klinikleri tip bilimleri dergisi                             | 3  | 48   | 0       |
| ultrasonics sonochemistry                                            | 1  | 31   | 20      |
| ultrasound in medicine and biology                                   | 1  | 120  | 62      |
| unveiling diabetes - historical milestones in diabetology            | 2  | 550  | 0       |
| urologe                                                              | 45 | 0    | 4       |
| vestnik oftalmologii                                                 | 1  | 2    | 1       |
| veterinaria                                                          | 5  | 17   | 0       |
| veterinary clinics of north america-small animal practice            | 5  | 170  | 13.5    |
| veterinary ophthalmology                                             | 5  | 468  | 14.2222 |
| vision research                                                      | 2  | 24   | 57      |
| vlaams diergeneeskundig tijdschrift                                  | 5  | 11   | 0       |
| vojnosanitetski pregled                                              | 2  | 27   | 3       |
| western journal of medicine                                          | 1  | 118  | 7       |
| wiener klinische wochenschrift                                       | 2  | 2089 | 1.75    |
| world journal of clinical cases                                      | 2  | 18   | 0       |
| world neurosurgery                                                   | 3  | 16   | 1       |
| wound repair and regeneration                                        | 3  | 4    | 18      |
| wounds-a compendium of clinical research and practice                | 1  | 14   | 3       |
| zeitschrift fur medizinische physik                                  | 1  | 861  | 162     |

---

**Supplementary Table 5. Average citations and total link strength of authors per cluster based on bibliographic coupling analysis (References) .**

| References                 | Cluster | DOI                                                                                                                       | Total Link Strength | Avg. citations |
|----------------------------|---------|---------------------------------------------------------------------------------------------------------------------------|---------------------|----------------|
| ohba (2007)                | 4       | <a href="https://doi.org/10.1001/archophth.125.7.952">https://doi.org/10.1001/archophth.125.7.952</a>                     | 292                 | 75             |
| moisseiev (1995)           | 4       | <a href="https://doi.org/10.1001/archophth.1995.01100020069031">https://doi.org/10.1001/archophth.1995.01100020069031</a> | 42                  | 79             |
| mohamed (2007a)            | 2       | <a href="https://doi.org/10.1001/jama.298.8.902">https://doi.org/10.1001/jama.298.8.902</a>                               | 236                 | 572            |
| bressler (2013)            | 2       | <a href="https://doi.org/10.1001/jamaophthalmol.2013.4154">https://doi.org/10.1001/jamaophthalmol.2013.4154</a>           | 98                  | 76             |
| avery (2016)               | 2       | <a href="https://doi.org/10.1001/jamaophthalmol.2015.4070">https://doi.org/10.1001/jamaophthalmol.2015.4070</a>           | 128                 | 130            |
| gliem (2016)               | 4       | <a href="https://doi.org/10.1001/jamaophthalmol.2016.1475">https://doi.org/10.1001/jamaophthalmol.2016.1475</a>           | 64                  | 78             |
| krauss (1995)              | 3       | <a href="https://doi.org/10.1002/lsm.1900170203">https://doi.org/10.1002/lsm.1900170203</a>                               | 489                 | 70             |
| looker (2013)              | 2       | <a href="https://doi.org/10.1007/s00125-013-2928-7">https://doi.org/10.1007/s00125-013-2928-7</a>                         | 39                  | 50             |
| mierdel (1997)             | 1       | <a href="https://doi.org/10.1007/s003470050140">https://doi.org/10.1007/s003470050140</a>                                 | 10                  | 62             |
| lege (2004)                | 3       | <a href="https://doi.org/10.1007/s00417-003-0672-2">https://doi.org/10.1007/s00417-003-0672-2</a>                         | 30                  | 58             |
| grueb (2006)               | 5       | <a href="https://doi.org/10.1007/s00417-006-0280-z">https://doi.org/10.1007/s00417-006-0280-z</a>                         | 36                  | 55             |
| melancia (2016)            | 2       | <a href="https://doi.org/10.1007/s00417-016-3360-8">https://doi.org/10.1007/s00417-016-3360-8</a>                         | 18                  | 75             |
| stahl (2013)               | 2       | <a href="https://doi.org/10.1007/s10456-012-9302-0">https://doi.org/10.1007/s10456-012-9302-0</a>                         | 46                  | 53             |
| scholz (2017)              | 2       | <a href="https://doi.org/10.1007/s12325-017-0559-y">https://doi.org/10.1007/s12325-017-0559-y</a>                         | 103                 | 74             |
| flach (1992)               | 8       | <a href="https://doi.org/10.1016/0039-6257(92)90095-b">https://doi.org/10.1016/0039-6257(92)90095-b</a>                   | 32                  | 149            |
| ho (1992)                  | 2       | <a href="https://doi.org/10.1016/0039-6257(92)90137-i">https://doi.org/10.1016/0039-6257(92)90137-i</a>                   | 72                  | 53             |
| lee (2005b)                | 1       | <a href="https://doi.org/10.1016/j.ajo.2004.08.049">https://doi.org/10.1016/j.ajo.2004.08.049</a>                         | 25                  | 80             |
| manivannan (2005)          | 4       | <a href="https://doi.org/10.1016/j.ajo.2005.02.055">https://doi.org/10.1016/j.ajo.2005.02.055</a>                         | 1                   | 115            |
| tasman (2006)              | 9       | <a href="https://doi.org/10.1016/j.ajo.2005.07.034">https://doi.org/10.1016/j.ajo.2005.07.034</a>                         | 43                  | 54             |
| holekamp (2006)            | 2       | <a href="https://doi.org/10.1016/j.ajo.2006.01.016">https://doi.org/10.1016/j.ajo.2006.01.016</a>                         | 18                  | 87             |
| lim (2007)                 | 6       | <a href="https://doi.org/10.1016/j.ajo.2006.11.030">https://doi.org/10.1016/j.ajo.2006.11.030</a>                         | 39                  | 56             |
| schmitz-valckenberg (2008) | 4       | <a href="https://doi.org/10.1016/j.ajo.2008.04.006">https://doi.org/10.1016/j.ajo.2008.04.006</a>                         | 51                  | 56             |
| soong (2009)               | 6       | <a href="https://doi.org/10.1016/j.ajo.2008.08.026">https://doi.org/10.1016/j.ajo.2008.08.026</a>                         | 61                  | 178            |
| tugal-tutkun (2009a)       | 11      | <a href="https://doi.org/10.1016/j.ajo.2009.04.007">https://doi.org/10.1016/j.ajo.2009.04.007</a>                         | 5                   | 66             |
| erie (2009)                | 7       | <a href="https://doi.org/10.1016/j.ajo.2009.06.022">https://doi.org/10.1016/j.ajo.2009.06.022</a>                         | 54                  | 112            |
| kiernan (2010)             | 3       | <a href="https://doi.org/10.1016/j.ajo.2009.08.037">https://doi.org/10.1016/j.ajo.2009.08.037</a>                         | 69                  | 170            |
| flores-moreno (2013)       | 3       | <a href="https://doi.org/10.1016/j.ajo.2012.07.015">https://doi.org/10.1016/j.ajo.2012.07.015</a>                         | 27                  | 174            |
| shoham (2008)              | 7       | <a href="https://doi.org/10.1016/j.freeradiomed.2008.07.021">https://doi.org/10.1016/j.freeradiomed.2008.07.021</a>       | 4                   | 136            |
| wu (2004)                  | 5       | <a href="https://doi.org/10.1016/j.jcrs.2003.07.009">https://doi.org/10.1016/j.jcrs.2003.07.009</a>                       | 23                  | 80             |
| liu (2005)                 | 5       | <a href="https://doi.org/10.1016/j.jcrs.2004.09.031">https://doi.org/10.1016/j.jcrs.2004.09.031</a>                       | 19                  | 555            |
| buehl (2005)               | 8       | <a href="https://doi.org/10.1016/j.jcrs.2004.09.053">https://doi.org/10.1016/j.jcrs.2004.09.053</a>                       | 50                  | 77             |
| yoon (2005)                | 1       | <a href="https://doi.org/10.1016/j.jcrs.2004.10.046">https://doi.org/10.1016/j.jcrs.2004.10.046</a>                       | 70                  | 119            |
| rawer (2005)               | 1       | <a href="https://doi.org/10.1016/j.jcrs.2005.01.033">https://doi.org/10.1016/j.jcrs.2005.01.033</a>                       | 6                   | 69             |
| tahzib (2005)              | 1       | <a href="https://doi.org/10.1016/j.jcrs.2005.08.022">https://doi.org/10.1016/j.jcrs.2005.08.022</a>                       | 126                 | 51             |
| menapace (2005)            | 8       | <a href="https://doi.org/10.1016/j.jcrs.2005.08.051">https://doi.org/10.1016/j.jcrs.2005.08.051</a>                       | 17                  | 50             |
| porter (2006)              | 1       | <a href="https://doi.org/10.1016/j.jcrs.2005.10.027">https://doi.org/10.1016/j.jcrs.2005.10.027</a>                       | 54                  | 52             |
| salib (2006)               | 7       | <a href="https://doi.org/10.1016/j.jcrs.2005.10.034">https://doi.org/10.1016/j.jcrs.2005.10.034</a>                       | 71                  | 57             |
| walter (2006)              | 10      | <a href="https://doi.org/10.1016/j.jcrs.2005.12.140">https://doi.org/10.1016/j.jcrs.2005.12.140</a>                       | 17                  | 64             |
| ciolino (2006)             | 1       | <a href="https://doi.org/10.1016/j.jcrs.2006.03.037">https://doi.org/10.1016/j.jcrs.2006.03.037</a>                       | 42                  | 96             |
| kahraman (2007)            | 1       | <a href="https://doi.org/10.1016/j.jcrs.2007.01.013">https://doi.org/10.1016/j.jcrs.2007.01.013</a>                       | 14                  | 61             |
| ho (2007)                  | 1       | <a href="https://doi.org/10.1016/j.jcrs.2007.03.028">https://doi.org/10.1016/j.jcrs.2007.03.028</a>                       | 24                  | 78             |
| ciolino (2007)             | 1       | <a href="https://doi.org/10.1016/j.jcrs.2007.04.016">https://doi.org/10.1016/j.jcrs.2007.04.016</a>                       | 35                  | 56             |
| kim (2008)                 | 15      | <a href="https://doi.org/10.1016/j.jcrs.2007.08.036">https://doi.org/10.1016/j.jcrs.2007.08.036</a>                       | 0                   | 63             |
| woodward (2008)            | 7       | <a href="https://doi.org/10.1016/j.jcrs.2007.10.025">https://doi.org/10.1016/j.jcrs.2007.10.025</a>                       | 15                  | 52             |
| touboul (2008)             | 6       | <a href="https://doi.org/10.1016/j.jcrs.2007.11.051">https://doi.org/10.1016/j.jcrs.2007.11.051</a>                       | 8                   | 207            |
| sekundo (2008)             | 6       | <a href="https://doi.org/10.1016/j.jcrs.2008.05.033">https://doi.org/10.1016/j.jcrs.2008.05.033</a>                       | 41                  | 236            |
| neuhann (2008)             | 1       | <a href="https://doi.org/10.1016/j.jcrs.2008.06.022">https://doi.org/10.1016/j.jcrs.2008.06.022</a>                       | 23                  | 58             |
| kamiya (2008)              | 1       | <a href="https://doi.org/10.1016/j.jcrs.2008.06.030">https://doi.org/10.1016/j.jcrs.2008.06.030</a>                       | 31                  | 66             |
| von jagow (2009)           | 6       | <a href="https://doi.org/10.1016/j.jcrs.2008.09.013">https://doi.org/10.1016/j.jcrs.2008.09.013</a>                       | 51                  | 99             |
| vock (2009)                | 8       | <a href="https://doi.org/10.1016/j.jcrs.2008.11.044">https://doi.org/10.1016/j.jcrs.2008.11.044</a>                       | 23                  | 50             |
| leysen (2009)              | 14      | <a href="https://doi.org/10.1016/j.jcrs.2009.01.024">https://doi.org/10.1016/j.jcrs.2009.01.024</a>                       | 0                   | 52             |
| wollensak (2010)           | 7       | <a href="https://doi.org/10.1016/j.jcrs.2009.07.044">https://doi.org/10.1016/j.jcrs.2009.07.044</a>                       | 8                   | 123            |
| moshirfar (2010)           | 6       | <a href="https://doi.org/10.1016/j.jcrs.2010.05.027">https://doi.org/10.1016/j.jcrs.2010.05.027</a>                       | 58                  | 105            |
| ahn (2011)                 | 6       | <a href="https://doi.org/10.1016/j.jcrs.2010.08.042">https://doi.org/10.1016/j.jcrs.2010.08.042</a>                       | 82                  | 63             |
| chen (2011)                | 3       | <a href="https://doi.org/10.1016/j.jcrs.2010.10.041">https://doi.org/10.1016/j.jcrs.2010.10.041</a>                       | 26                  | 69             |
| de vries (2011)            | 1       | <a href="https://doi.org/10.1016/j.jcrs.2010.11.032">https://doi.org/10.1016/j.jcrs.2010.11.032</a>                       | 3                   | 244            |
| goldich (2011)             | 6       | <a href="https://doi.org/10.1016/j.jcrs.2011.03.038">https://doi.org/10.1016/j.jcrs.2011.03.038</a>                       | 10                  | 52             |
| savini (2011b)             | 6       | <a href="https://doi.org/10.1016/j.jcrs.2011.03.055">https://doi.org/10.1016/j.jcrs.2011.03.055</a>                       | 25                  | 65             |
| savini (2011a)             | 6       | <a href="https://doi.org/10.1016/j.jcrs.2011.04.033">https://doi.org/10.1016/j.jcrs.2011.04.033</a>                       | 39                  | 112            |
| nagy (2012)                | 3       | <a href="https://doi.org/10.1016/j.jcrs.2012.02.031">https://doi.org/10.1016/j.jcrs.2012.02.031</a>                       | 60                  | 55             |
| kamiya (2012)              | 6       | <a href="https://doi.org/10.1016/j.jcrs.2012.06.052">https://doi.org/10.1016/j.jcrs.2012.06.052</a>                       | 39                  | 53             |
| vestergaard (2012)         | 6       | <a href="https://doi.org/10.1016/j.jcrs.2012.07.021">https://doi.org/10.1016/j.jcrs.2012.07.021</a>                       | 30                  | 182            |
| auffarth (2013)            | 6       | <a href="https://doi.org/10.1016/j.jcrs.2012.08.065">https://doi.org/10.1016/j.jcrs.2012.08.065</a>                       | 28                  | 59             |
| rueckl (2013)              | 6       | <a href="https://doi.org/10.1016/j.jcrs.2012.10.043">https://doi.org/10.1016/j.jcrs.2012.10.043</a>                       | 11                  | 79             |
| vestergaard (2014)         | 6       | <a href="https://doi.org/10.1016/j.jcrs.2013.07.053">https://doi.org/10.1016/j.jcrs.2013.07.053</a>                       | 43                  | 82             |
| wu (2014b)                 | 6       | <a href="https://doi.org/10.1016/j.jcrs.2013.07.056">https://doi.org/10.1016/j.jcrs.2013.07.056</a>                       | 44                  | 125            |
| nagy (2014)                | 6       | <a href="https://doi.org/10.1016/j.jcrs.2013.08.046">https://doi.org/10.1016/j.jcrs.2013.08.046</a>                       | 41                  | 85             |
| cruzat (2017)              | 7       | <a href="https://doi.org/10.1016/j.jtos.2016.09.004">https://doi.org/10.1016/j.jtos.2016.09.004</a>                       | 381                 | 156            |
| geerling (2017)            | 7       | <a href="https://doi.org/10.1016/j.jtos.2017.01.006">https://doi.org/10.1016/j.jtos.2017.01.006</a>                       | 37                  | 67             |
| gomes (2017)               | 7       | <a href="https://doi.org/10.1016/j.jtos.2017.05.004">https://doi.org/10.1016/j.jtos.2017.05.004</a>                       | 186                 | 167            |
| edmunds (2004)             | 5       | <a href="https://doi.org/10.1016/j.ophtha.2003.04.005">https://doi.org/10.1016/j.ophtha.2003.04.005</a>                   | 29                  | 52             |
| shimura (2003)             | 2       | <a href="https://doi.org/10.1016/j.ophtha.2003.05.008">https://doi.org/10.1016/j.ophtha.2003.05.008</a>                   | 28                  | 88             |
| tannenbaum (2004)          | 3       | <a href="https://doi.org/10.1016/j.ophtha.2003.05.015">https://doi.org/10.1016/j.ophtha.2003.05.015</a>                   | 62                  | 55             |
| olsen (2004)               | 4       | <a href="https://doi.org/10.1016/j.ophtha.2003.05.030">https://doi.org/10.1016/j.ophtha.2003.05.030</a>                   | 85                  | 63             |
| mason (2004)               | 2       | <a href="https://doi.org/10.1016/j.ophtha.2003.05.032">https://doi.org/10.1016/j.ophtha.2003.05.032</a>                   | 28                  | 56             |
| massin (2004)              | 2       | <a href="https://doi.org/10.1016/j.ophtha.2003.05.037">https://doi.org/10.1016/j.ophtha.2003.05.037</a>                   | 62                  | 328            |
| chalita (2004)             | 1       | <a href="https://doi.org/10.1016/j.ophtha.2003.06.022">https://doi.org/10.1016/j.ophtha.2003.06.022</a>                   | 23                  | 155            |
| jun (2004)                 | 1       | <a href="https://doi.org/10.1016/j.ophtha.2003.06.026">https://doi.org/10.1016/j.ophtha.2003.06.026</a>                   | 10                  | 69             |
| browning (2004)            | 2       | <a href="https://doi.org/10.1016/j.ophtha.2003.06.028">https://doi.org/10.1016/j.ophtha.2003.06.028</a>                   | 43                  | 153            |
| fayet (2004)               | 12      | <a href="https://doi.org/10.1016/j.ophtha.2003.08.023">https://doi.org/10.1016/j.ophtha.2003.08.023</a>                   | 10                  | 72             |
| ederer (2004)              | 5       | <a href="https://doi.org/10.1016/j.ophtha.2003.09.025">https://doi.org/10.1016/j.ophtha.2003.09.025</a>                   | 73                  | 120            |
| chiang (2004)              | 9       | <a href="https://doi.org/10.1016/j.ophtha.2003.10.030">https://doi.org/10.1016/j.ophtha.2003.10.030</a>                   | 17                  | 95             |
| tomany (2004)              | 4       | <a href="https://doi.org/10.1016/j.ophtha.2003.11.010">https://doi.org/10.1016/j.ophtha.2003.11.010</a>                   | 53                  | 445            |
| sunness (2004)             | 4       | <a href="https://doi.org/10.1016/j.ophtha.2003.12.050">https://doi.org/10.1016/j.ophtha.2003.12.050</a>                   | 15                  | 107            |
| chan (2004)                | 4       | <a href="https://doi.org/10.1016/j.ophtha.2003.12.056">https://doi.org/10.1016/j.ophtha.2003.12.056</a>                   | 45                  | 240            |
| findl (2004)               | 3       | <a href="https://doi.org/10.1016/j.ophtha.2003.12.057">https://doi.org/10.1016/j.ophtha.2003.12.057</a>                   | 62                  | 52             |
| aung (2004)                | 5       | <a href="https://doi.org/10.1016/j.ophtha.2003.12.061">https://doi.org/10.1016/j.ophtha.2003.12.061</a>                   | 45                  | 82             |
| lorenz (2004)              | 4       | <a href="https://doi.org/10.1016/j.ophtha.2004.01.033">https://doi.org/10.1016/j.ophtha.2004.01.033</a>                   | 85                  | 109            |
| puusaari (2004)            | 8       | <a href="https://doi.org/10.1016/j.ophtha.2004.03.027">https://doi.org/10.1016/j.ophtha.2004.03.027</a>                   | 9                   | 73             |

|                          |    |                                                                                                         |     |     |
|--------------------------|----|---------------------------------------------------------------------------------------------------------|-----|-----|
| gunduz (2004)            | 8  | <a href="https://doi.org/10.1016/j.ophtha.2004.04.016">https://doi.org/10.1016/j.ophtha.2004.04.016</a> | 9   | 54  |
| reus (2004)              | 3  | <a href="https://doi.org/10.1016/j.ophtha.2004.04.024">https://doi.org/10.1016/j.ophtha.2004.04.024</a> | 65  | 129 |
| juzych (2004)            | 5  | <a href="https://doi.org/10.1016/j.ophtha.2004.04.030">https://doi.org/10.1016/j.ophtha.2004.04.030</a> | 31  | 169 |
| varley (2004)            | 1  | <a href="https://doi.org/10.1016/j.ophtha.2004.05.016">https://doi.org/10.1016/j.ophtha.2004.05.016</a> | 175 | 110 |
| rajan (2004)             | 1  | <a href="https://doi.org/10.1016/j.ophtha.2004.05.019">https://doi.org/10.1016/j.ophtha.2004.05.019</a> | 217 | 117 |
| ko (2004)                | 3  | <a href="https://doi.org/10.1016/j.ophtha.2004.05.021">https://doi.org/10.1016/j.ophtha.2004.05.021</a> | 64  | 174 |
| sutter (2004)            | 2  | <a href="https://doi.org/10.1016/j.ophtha.2004.05.025">https://doi.org/10.1016/j.ophtha.2004.05.025</a> | 87  | 181 |
| kanamori (2004)          | 3  | <a href="https://doi.org/10.1016/j.ophtha.2004.05.035">https://doi.org/10.1016/j.ophtha.2004.05.035</a> | 99  | 88  |
| bellmann (2004)          | 4  | <a href="https://doi.org/10.1016/j.ophtha.2004.06.019">https://doi.org/10.1016/j.ophtha.2004.06.019</a> | 7   | 89  |
| kohnen (2004)            | 1  | <a href="https://doi.org/10.1016/j.ophtha.2004.06.027">https://doi.org/10.1016/j.ophtha.2004.06.027</a> | 86  | 108 |
| soong (2005)             | 6  | <a href="https://doi.org/10.1016/j.ophtha.2004.06.037">https://doi.org/10.1016/j.ophtha.2004.06.037</a> | 22  | 83  |
| budenz (2005)            | 3  | <a href="https://doi.org/10.1016/j.ophtha.2004.06.039">https://doi.org/10.1016/j.ophtha.2004.06.039</a> | 112 | 217 |
| findl (2005)             | 8  | <a href="https://doi.org/10.1016/j.ophtha.2004.07.032">https://doi.org/10.1016/j.ophtha.2004.07.032</a> | 47  | 76  |
| gambato (2005)           | 1  | <a href="https://doi.org/10.1016/j.ophtha.2004.07.035">https://doi.org/10.1016/j.ophtha.2004.07.035</a> | 122 | 127 |
| sakai (2005)             | 5  | <a href="https://doi.org/10.1016/j.ophtha.2004.08.026">https://doi.org/10.1016/j.ophtha.2004.08.026</a> | 14  | 68  |
| jaycock (2005)           | 1  | <a href="https://doi.org/10.1016/j.ophtha.2004.09.017">https://doi.org/10.1016/j.ophtha.2004.09.017</a> | 144 | 88  |
| springer (2005)          | 4  | <a href="https://doi.org/10.1016/j.ophtha.2004.11.051">https://doi.org/10.1016/j.ophtha.2004.11.051</a> | 28  | 111 |
| martinez-castillo (2005) | 16 | <a href="https://doi.org/10.1016/j.ophtha.2004.12.046">https://doi.org/10.1016/j.ophtha.2004.12.046</a> | 0   | 71  |
| browning (2005)          | 4  | <a href="https://doi.org/10.1016/j.ophtha.2005.02.011">https://doi.org/10.1016/j.ophtha.2005.02.011</a> | 28  | 57  |
| oshika (2006)            | 1  | <a href="https://doi.org/10.1016/j.ophtha.2006.03.061">https://doi.org/10.1016/j.ophtha.2006.03.061</a> | 92  | 115 |
| sakata (2006)            | 2  | <a href="https://doi.org/10.1016/j.ophtha.2006.04.023">https://doi.org/10.1016/j.ophtha.2006.04.023</a> | 71  | 53  |
| sharma (2006)            | 5  | <a href="https://doi.org/10.1016/j.ophtha.2006.04.031">https://doi.org/10.1016/j.ophtha.2006.04.031</a> | 15  | 53  |
| kurz (2006)              | 1  | <a href="https://doi.org/10.1016/j.ophtha.2006.05.013">https://doi.org/10.1016/j.ophtha.2006.05.013</a> | 19  | 73  |
| shortt (2006)            | 1  | <a href="https://doi.org/10.1016/j.ophtha.2006.08.013">https://doi.org/10.1016/j.ophtha.2006.08.013</a> | 218 | 74  |
| park (2006)              | 4  | <a href="https://doi.org/10.1016/j.ophtha.2006.08.015">https://doi.org/10.1016/j.ophtha.2006.08.015</a> | 58  | 53  |
| mohamed (2007b)          | 2  | <a href="https://doi.org/10.1016/j.ophtha.2006.11.011">https://doi.org/10.1016/j.ophtha.2006.11.011</a> | 41  | 118 |
| shabayek (2007)          | 6  | <a href="https://doi.org/10.1016/j.ophtha.2006.11.033">https://doi.org/10.1016/j.ophtha.2006.11.033</a> | 25  | 141 |
| mcintosh (2007)          | 2  | <a href="https://doi.org/10.1016/j.ophtha.2007.01.010">https://doi.org/10.1016/j.ophtha.2007.01.010</a> | 54  | 109 |
| ferreras (2007)          | 3  | <a href="https://doi.org/10.1016/j.ophtha.2007.01.015">https://doi.org/10.1016/j.ophtha.2007.01.015</a> | 107 | 53  |
| gomi (2008)              | 4  | <a href="https://doi.org/10.1016/j.ophtha.2007.02.031">https://doi.org/10.1016/j.ophtha.2007.02.031</a> | 38  | 206 |
| wong (2008)              | 4  | <a href="https://doi.org/10.1016/j.ophtha.2007.03.008">https://doi.org/10.1016/j.ophtha.2007.03.008</a> | 144 | 412 |
| leske (2007)             | 5  | <a href="https://doi.org/10.1016/j.ophtha.2007.03.016">https://doi.org/10.1016/j.ophtha.2007.03.016</a> | 29  | 928 |
| lin (2007)               | 3  | <a href="https://doi.org/10.1016/j.ophtha.2007.07.005">https://doi.org/10.1016/j.ophtha.2007.07.005</a> | 129 | 107 |
| minckler (2008)          | 5  | <a href="https://doi.org/10.1016/j.ophtha.2008.03.031">https://doi.org/10.1016/j.ophtha.2008.03.031</a> | 12  | 203 |
| schallhorn (2008)        | 1  | <a href="https://doi.org/10.1016/j.ophtha.2008.04.010">https://doi.org/10.1016/j.ophtha.2008.04.010</a> | 55  | 93  |
| dawson (2008)            | 1  | <a href="https://doi.org/10.1016/j.ophtha.2008.06.008">https://doi.org/10.1016/j.ophtha.2008.06.008</a> | 42  | 99  |
| chen (2008)              | 2  | <a href="https://doi.org/10.1016/j.ophtha.2008.08.026">https://doi.org/10.1016/j.ophtha.2008.08.026</a> | 12  | 104 |
| boixadera (2009)         | 4  | <a href="https://doi.org/10.1016/j.ophtha.2008.08.029">https://doi.org/10.1016/j.ophtha.2008.08.029</a> | 65  | 71  |
| inoue (2009)             | 3  | <a href="https://doi.org/10.1016/j.ophtha.2008.09.008">https://doi.org/10.1016/j.ophtha.2008.09.008</a> | 30  | 117 |
| noma (2009)              | 2  | <a href="https://doi.org/10.1016/j.ophtha.2008.09.034">https://doi.org/10.1016/j.ophtha.2008.09.034</a> | 28  | 157 |
| scott (2009)             | 2  | <a href="https://doi.org/10.1016/j.ophtha.2008.10.017">https://doi.org/10.1016/j.ophtha.2008.10.017</a> | 50  | 92  |
| oshima (2009)            | 2  | <a href="https://doi.org/10.1016/j.ophtha.2008.11.005">https://doi.org/10.1016/j.ophtha.2008.11.005</a> | 37  | 121 |
| see (2009)               | 3  | <a href="https://doi.org/10.1016/j.ophtha.2008.12.005">https://doi.org/10.1016/j.ophtha.2008.12.005</a> | 20  | 73  |
| solomon (2009)           | 1  | <a href="https://doi.org/10.1016/j.ophtha.2008.12.037">https://doi.org/10.1016/j.ophtha.2008.12.037</a> | 58  | 202 |
| bolz (2009)              | 2  | <a href="https://doi.org/10.1016/j.ophtha.2008.12.039">https://doi.org/10.1016/j.ophtha.2008.12.039</a> | 19  | 259 |
| sung (2009a)             | 3  | <a href="https://doi.org/10.1016/j.ophtha.2008.12.045">https://doi.org/10.1016/j.ophtha.2008.12.045</a> | 52  | 157 |
| medeiros (2009)          | 3  | <a href="https://doi.org/10.1016/j.ophtha.2008.12.062">https://doi.org/10.1016/j.ophtha.2008.12.062</a> | 86  | 64  |
| yeung (2009)             | 3  | <a href="https://doi.org/10.1016/j.ophtha.2008.12.063">https://doi.org/10.1016/j.ophtha.2008.12.063</a> | 92  | 78  |
| slade (2009)             | 6  | <a href="https://doi.org/10.1016/j.ophtha.2009.01.001">https://doi.org/10.1016/j.ophtha.2009.01.001</a> | 64  | 64  |
| sung (2009b)             | 3  | <a href="https://doi.org/10.1016/j.ophtha.2009.01.004">https://doi.org/10.1016/j.ophtha.2009.01.004</a> | 91  | 151 |
| soheilian (2009)         | 2  | <a href="https://doi.org/10.1016/j.ophtha.2009.01.011">https://doi.org/10.1016/j.ophtha.2009.01.011</a> | 134 | 147 |
| nubile (2009)            | 6  | <a href="https://doi.org/10.1016/j.ophtha.2009.01.013">https://doi.org/10.1016/j.ophtha.2009.01.013</a> | 27  | 99  |
| takamura (2009)          | 2  | <a href="https://doi.org/10.1016/j.ophtha.2009.01.014">https://doi.org/10.1016/j.ophtha.2009.01.014</a> | 134 | 73  |
| yilmaz (2009)            | 2  | <a href="https://doi.org/10.1016/j.ophtha.2009.02.002">https://doi.org/10.1016/j.ophtha.2009.02.002</a> | 110 | 87  |
| tugal-tutkun (2009b)     | 11 | <a href="https://doi.org/10.1016/j.ophtha.2009.02.019">https://doi.org/10.1016/j.ophtha.2009.02.019</a> | 5   | 51  |
| hillenkamp (2009)        | 5  | <a href="https://doi.org/10.1016/j.ophtha.2009.03.029">https://doi.org/10.1016/j.ophtha.2009.03.029</a> | 9   | 93  |
| nguyen (2009)            | 2  | <a href="https://doi.org/10.1016/j.ophtha.2009.04.023">https://doi.org/10.1016/j.ophtha.2009.04.023</a> | 77  | 250 |
| chauhan (2009)           | 3  | <a href="https://doi.org/10.1016/j.ophtha.2009.04.031">https://doi.org/10.1016/j.ophtha.2009.04.031</a> | 88  | 72  |
| gillies (2009)           | 2  | <a href="https://doi.org/10.1016/j.ophtha.2009.04.049">https://doi.org/10.1016/j.ophtha.2009.04.049</a> | 37  | 62  |
| emilia mulet (2009)      | 1  | <a href="https://doi.org/10.1016/j.ophtha.2009.05.019">https://doi.org/10.1016/j.ophtha.2009.05.019</a> | 12  | 64  |
| chavala (2009)           | 3  | <a href="https://doi.org/10.1016/j.ophtha.2009.06.003">https://doi.org/10.1016/j.ophtha.2009.06.003</a> | 54  | 116 |
| leung (2010)             | 3  | <a href="https://doi.org/10.1016/j.ophtha.2009.06.061">https://doi.org/10.1016/j.ophtha.2009.06.061</a> | 91  | 79  |
| byeon (2009)             | 2  | <a href="https://doi.org/10.1016/j.ophtha.2009.06.066">https://doi.org/10.1016/j.ophtha.2009.06.066</a> | 50  | 54  |
| fotedar (2010)           | 3  | <a href="https://doi.org/10.1016/j.ophtha.2009.07.028">https://doi.org/10.1016/j.ophtha.2009.07.028</a> | 22  | 95  |
| raman (2010)             | 2  | <a href="https://doi.org/10.1016/j.ophtha.2009.09.005">https://doi.org/10.1016/j.ophtha.2009.09.005</a> | 29  | 53  |
| prasad (2010)            | 2  | <a href="https://doi.org/10.1016/j.ophtha.2009.09.019">https://doi.org/10.1016/j.ophtha.2009.09.019</a> | 12  | 122 |
| reus (2010)              | 3  | <a href="https://doi.org/10.1016/j.ophtha.2009.09.026">https://doi.org/10.1016/j.ophtha.2009.09.026</a> | 89  | 100 |
| campochiaro (2010)       | 2  | <a href="https://doi.org/10.1016/j.ophtha.2009.11.024">https://doi.org/10.1016/j.ophtha.2009.11.024</a> | 120 | 108 |
| ibrahim (2010)           | 7  | <a href="https://doi.org/10.1016/j.ophtha.2009.12.029">https://doi.org/10.1016/j.ophtha.2009.12.029</a> | 21  | 76  |
| stringham (2010)         | 1  | <a href="https://doi.org/10.1016/j.ophtha.2009.12.032">https://doi.org/10.1016/j.ophtha.2009.12.032</a> | 1   | 51  |
| blasi (2010)             | 4  | <a href="https://doi.org/10.1016/j.ophtha.2009.12.033">https://doi.org/10.1016/j.ophtha.2009.12.033</a> | 47  | 56  |
| midenas (2010)           | 4  | <a href="https://doi.org/10.1016/j.ophtha.2009.12.044">https://doi.org/10.1016/j.ophtha.2009.12.044</a> | 20  | 84  |
| quan dong nguyen (2010)  | 2  | <a href="https://doi.org/10.1016/j.ophtha.2010.08.016">https://doi.org/10.1016/j.ophtha.2010.08.016</a> | 45  | 401 |
| ooto (2011)              | 4  | <a href="https://doi.org/10.1016/j.ophtha.2010.08.032">https://doi.org/10.1016/j.ophtha.2010.08.032</a> | 22  | 103 |
| mccarthy (2011)          | 10 | <a href="https://doi.org/10.1016/j.ophtha.2010.08.048">https://doi.org/10.1016/j.ophtha.2010.08.048</a> | 36  | 94  |
| kozak (2011)             | 2  | <a href="https://doi.org/10.1016/j.ophtha.2010.10.007">https://doi.org/10.1016/j.ophtha.2010.10.007</a> | 103 | 80  |
| kim (2011)               | 5  | <a href="https://doi.org/10.1016/j.ophtha.2010.10.016">https://doi.org/10.1016/j.ophtha.2010.10.016</a> | 82  | 209 |
| campochiaro (2011)       | 2  | <a href="https://doi.org/10.1016/j.ophtha.2010.12.028">https://doi.org/10.1016/j.ophtha.2010.12.028</a> | 156 | 251 |
| elman (2011)             | 2  | <a href="https://doi.org/10.1016/j.ophtha.2010.12.033">https://doi.org/10.1016/j.ophtha.2010.12.033</a> | 32  | 408 |
| mittell (2011)           | 2  | <a href="https://doi.org/10.1016/j.ophtha.2011.01.031">https://doi.org/10.1016/j.ophtha.2011.01.031</a> | 140 | 938 |
| brown (2011)             | 2  | <a href="https://doi.org/10.1016/j.ophtha.2011.02.022">https://doi.org/10.1016/j.ophtha.2011.02.022</a> | 75  | 371 |
| shah (2011)              | 2  | <a href="https://doi.org/10.1016/j.ophtha.2011.02.034">https://doi.org/10.1016/j.ophtha.2011.02.034</a> | 74  | 153 |
| sultan (2011)            | 2  | <a href="https://doi.org/10.1016/j.ophtha.2011.02.045">https://doi.org/10.1016/j.ophtha.2011.02.045</a> | 187 | 123 |
| pearson (2011)           | 2  | <a href="https://doi.org/10.1016/j.ophtha.2011.02.048">https://doi.org/10.1016/j.ophtha.2011.02.048</a> | 87  | 145 |
| francis (2011)           | 5  | <a href="https://doi.org/10.1016/j.ophtha.2011.03.028">https://doi.org/10.1016/j.ophtha.2011.03.028</a> | 3   | 144 |
| samples (2011)           | 5  | <a href="https://doi.org/10.1016/j.ophtha.2011.04.037">https://doi.org/10.1016/j.ophtha.2011.04.037</a> | 63  | 66  |
| christakis (2011)        | 5  | <a href="https://doi.org/10.1016/j.ophtha.2011.05.004">https://doi.org/10.1016/j.ophtha.2011.05.004</a> | 33  | 107 |
| viola (2012)             | 4  | <a href="https://doi.org/10.1016/j.ophtha.2011.07.046">https://doi.org/10.1016/j.ophtha.2011.07.046</a> | 9   | 84  |
| leonardi (2012)          | 7  | <a href="https://doi.org/10.1016/j.ophtha.2011.09.018">https://doi.org/10.1016/j.ophtha.2011.09.018</a> | 37  | 52  |
| hirakata (2012)          | 4  | <a href="https://doi.org/10.1016/j.ophtha.2011.09.026">https://doi.org/10.1016/j.ophtha.2011.09.026</a> | 2   | 76  |
| jampel (2012)            | 5  | <a href="https://doi.org/10.1016/j.ophtha.2011.09.049">https://doi.org/10.1016/j.ophtha.2011.09.049</a> | 28  | 101 |
| aiello (2011)            | 2  | <a href="https://doi.org/10.1016/j.ophtha.2011.09.058">https://doi.org/10.1016/j.ophtha.2011.09.058</a> | 71  | 80  |



|                         |    |                                                                                                         |     |      |
|-------------------------|----|---------------------------------------------------------------------------------------------------------|-----|------|
| leung (2012)            | 3  | <a href="https://doi.org/10.1016/j.ophtha.2011.10.010">https://doi.org/10.1016/j.ophtha.2011.10.010</a> | 47  | 159  |
| sawaguchi (2012)        | 5  | <a href="https://doi.org/10.1016/j.ophtha.2011.12.038">https://doi.org/10.1016/j.ophtha.2011.12.038</a> | 38  | 71   |
| quan dong nguyen (2012) | 2  | <a href="https://doi.org/10.1016/j.ophtha.2011.12.039">https://doi.org/10.1016/j.ophtha.2011.12.039</a> | 197 | 1061 |
| how (2012)              | 5  | <a href="https://doi.org/10.1016/j.ophtha.2012.01.019">https://doi.org/10.1016/j.ophtha.2012.01.019</a> | 33  | 56   |
| do (2012)               | 2  | <a href="https://doi.org/10.1016/j.ophtha.2012.02.010">https://doi.org/10.1016/j.ophtha.2012.02.010</a> | 161 | 270  |
| wu (2012)               | 3  | <a href="https://doi.org/10.1016/j.ophtha.2012.02.040">https://doi.org/10.1016/j.ophtha.2012.02.040</a> | 30  | 108  |
| hamrah (2012)           | 7  | <a href="https://doi.org/10.1016/j.ophtha.2012.03.005">https://doi.org/10.1016/j.ophtha.2012.03.005</a> | 48  | 52   |
| park (2012)             | 3  | <a href="https://doi.org/10.1016/j.ophtha.2012.03.006">https://doi.org/10.1016/j.ophtha.2012.03.006</a> | 9   | 151  |
| campochiaro (2012)      | 2  | <a href="https://doi.org/10.1016/j.ophtha.2012.04.030">https://doi.org/10.1016/j.ophtha.2012.04.030</a> | 60  | 327  |
| arbelaiez (2012)        | 6  | <a href="https://doi.org/10.1016/j.ophtha.2012.06.005">https://doi.org/10.1016/j.ophtha.2012.06.005</a> | 40  | 129  |
| lisboa (2012)           | 3  | <a href="https://doi.org/10.1016/j.ophtha.2012.06.009">https://doi.org/10.1016/j.ophtha.2012.06.009</a> | 66  | 77   |
| murakami (2012)         | 7  | <a href="https://doi.org/10.1016/j.ophtha.2012.06.013">https://doi.org/10.1016/j.ophtha.2012.06.013</a> | 11  | 57   |
| husain (2012)           | 5  | <a href="https://doi.org/10.1016/j.ophtha.2012.06.015">https://doi.org/10.1016/j.ophtha.2012.06.015</a> | 23  | 60   |
| lin (2012)              | 13 | <a href="https://doi.org/10.1016/j.ophtha.2012.06.046">https://doi.org/10.1016/j.ophtha.2012.06.046</a> | 0   | 67   |
| ho (2012)               | 2  | <a href="https://doi.org/10.1016/j.ophtha.2012.07.058">https://doi.org/10.1016/j.ophtha.2012.07.058</a> | 196 | 77   |
| pan (2013)              | 4  | <a href="https://doi.org/10.1016/j.ophtha.2012.07.065">https://doi.org/10.1016/j.ophtha.2012.07.065</a> | 34  | 96   |
| farjo (2013)            | 6  | <a href="https://doi.org/10.1016/j.ophtha.2012.08.013">https://doi.org/10.1016/j.ophtha.2012.08.013</a> | 106 | 95   |
| elman (2012)            | 2  | <a href="https://doi.org/10.1016/j.ophtha.2012.08.022">https://doi.org/10.1016/j.ophtha.2012.08.022</a> | 38  | 272  |
| chauhan (2013)          | 3  | <a href="https://doi.org/10.1016/j.ophtha.2012.09.055">https://doi.org/10.1016/j.ophtha.2012.09.055</a> | 46  | 251  |
| rudolf (2013)           | 4  | <a href="https://doi.org/10.1016/j.ophtha.2012.10.007">https://doi.org/10.1016/j.ophtha.2012.10.007</a> | 45  | 116  |
| roberts (2013)          | 6  | <a href="https://doi.org/10.1016/j.ophtha.2012.10.026">https://doi.org/10.1016/j.ophtha.2012.10.026</a> | 48  | 169  |
| tan (2013)              | 4  | <a href="https://doi.org/10.1016/j.ophtha.2012.12.002">https://doi.org/10.1016/j.ophtha.2012.12.002</a> | 68  | 64   |
| callanan (2013)         | 2  | <a href="https://doi.org/10.1016/j.ophtha.2013.02.018">https://doi.org/10.1016/j.ophtha.2013.02.018</a> | 144 | 130  |
| grulkowski (2013)       | 3  | <a href="https://doi.org/10.1016/j.ophtha.2013.04.007">https://doi.org/10.1016/j.ophtha.2013.04.007</a> | 96  | 56   |
| silva (2013)            | 2  | <a href="https://doi.org/10.1016/j.ophtha.2013.05.004">https://doi.org/10.1016/j.ophtha.2013.05.004</a> | 111 | 158  |
| smith (2013)            | 5  | <a href="https://doi.org/10.1016/j.ophtha.2013.05.034">https://doi.org/10.1016/j.ophtha.2013.05.034</a> | 54  | 67   |
| abell (2014a)           | 6  | <a href="https://doi.org/10.1016/j.ophtha.2013.07.056">https://doi.org/10.1016/j.ophtha.2013.07.056</a> | 44  | 70   |
| abell (2014b)           | 6  | <a href="https://doi.org/10.1016/j.ophtha.2013.08.013">https://doi.org/10.1016/j.ophtha.2013.08.013</a> | 59  | 95   |
| campochiaro (2014b)     | 2  | <a href="https://doi.org/10.1016/j.ophtha.2013.08.038">https://doi.org/10.1016/j.ophtha.2013.08.038</a> | 82  | 220  |
| ianchulev (2014)        | 10 | <a href="https://doi.org/10.1016/j.ophtha.2013.08.041">https://doi.org/10.1016/j.ophtha.2013.08.041</a> | 22  | 76   |
| alsulaiman (2014)       | 4  | <a href="https://doi.org/10.1016/j.ophtha.2013.09.006">https://doi.org/10.1016/j.ophtha.2013.09.006</a> | 1   | 51   |
| jordan (2014)           | 7  | <a href="https://doi.org/10.1016/j.ophtha.2013.09.014">https://doi.org/10.1016/j.ophtha.2013.09.014</a> | 41  | 64   |
| mrejen (2014)           | 4  | <a href="https://doi.org/10.1016/j.ophtha.2013.09.026">https://doi.org/10.1016/j.ophtha.2013.09.026</a> | 50  | 62   |
| stein (2014)            | 2  | <a href="https://doi.org/10.1016/j.ophtha.2013.10.037">https://doi.org/10.1016/j.ophtha.2013.10.037</a> | 47  | 59   |
| ivarsen (2014)          | 6  | <a href="https://doi.org/10.1016/j.ophtha.2013.11.006">https://doi.org/10.1016/j.ophtha.2013.11.006</a> | 43  | 232  |
| thach (2014)            | 2  | <a href="https://doi.org/10.1016/j.ophtha.2013.11.022">https://doi.org/10.1016/j.ophtha.2013.11.022</a> | 46  | 62   |
| bakri (2014)            | 2  | <a href="https://doi.org/10.1016/j.ophtha.2013.11.029">https://doi.org/10.1016/j.ophtha.2013.11.029</a> | 32  | 70   |
| schmidt-erfurth (2014)  | 2  | <a href="https://doi.org/10.1016/j.ophtha.2013.11.041">https://doi.org/10.1016/j.ophtha.2013.11.041</a> | 121 | 228  |
| miki (2014)             | 3  | <a href="https://doi.org/10.1016/j.ophtha.2014.01.017">https://doi.org/10.1016/j.ophtha.2014.01.017</a> | 94  | 110  |
| jia (2014a)             | 3  | <a href="https://doi.org/10.1016/j.ophtha.2014.01.021">https://doi.org/10.1016/j.ophtha.2014.01.021</a> | 55  | 497  |
| wu (2014a)              | 4  | <a href="https://doi.org/10.1016/j.ophtha.2014.01.025">https://doi.org/10.1016/j.ophtha.2014.01.025</a> | 32  | 51   |
| jia (2014b)             | 3  | <a href="https://doi.org/10.1016/j.ophtha.2014.01.034">https://doi.org/10.1016/j.ophtha.2014.01.034</a> | 78  | 546  |
| campochiaro (2014a)     | 2  | <a href="https://doi.org/10.1016/j.ophtha.2014.03.021">https://doi.org/10.1016/j.ophtha.2014.03.021</a> | 205 | 123  |
| jiang (2014)            | 5  | <a href="https://doi.org/10.1016/j.ophtha.2014.03.039">https://doi.org/10.1016/j.ophtha.2014.03.039</a> | 43  | 57   |
| cunha-vaz (2014)        | 2  | <a href="https://doi.org/10.1016/j.ophtha.2014.04.019">https://doi.org/10.1016/j.ophtha.2014.04.019</a> | 135 | 96   |
| boyer (2014)            | 2  | <a href="https://doi.org/10.1016/j.ophtha.2014.04.024">https://doi.org/10.1016/j.ophtha.2014.04.024</a> | 147 | 632  |
| korobelnik (2014)       | 2  | <a href="https://doi.org/10.1016/j.ophtha.2014.05.006">https://doi.org/10.1016/j.ophtha.2014.05.006</a> | 125 | 483  |
| chen (2014)             | 5  | <a href="https://doi.org/10.1016/j.ophtha.2014.05.010">https://doi.org/10.1016/j.ophtha.2014.05.010</a> | 10  | 57   |
| lepore (2014)           | 9  | <a href="https://doi.org/10.1016/j.ophtha.2014.05.015">https://doi.org/10.1016/j.ophtha.2014.05.015</a> | 52  | 131  |
| keane (2014)            | 4  | <a href="https://doi.org/10.1016/j.ophtha.2014.07.054">https://doi.org/10.1016/j.ophtha.2014.07.054</a> | 33  | 83   |
| duncker (2015)          | 4  | <a href="https://doi.org/10.1016/j.ophtha.2014.08.017">https://doi.org/10.1016/j.ophtha.2014.08.017</a> | 41  | 51   |
| campochiaro (2015b)     | 2  | <a href="https://doi.org/10.1016/j.ophtha.2014.08.031">https://doi.org/10.1016/j.ophtha.2014.08.031</a> | 118 | 165  |
| shields (2015)          | 8  | <a href="https://doi.org/10.1016/j.ophtha.2014.08.046">https://doi.org/10.1016/j.ophtha.2014.08.046</a> | 23  | 68   |
| elman (2015)            | 2  | <a href="https://doi.org/10.1016/j.ophtha.2014.08.047">https://doi.org/10.1016/j.ophtha.2014.08.047</a> | 58  | 242  |
| denoyer (2015)          | 7  | <a href="https://doi.org/10.1016/j.ophtha.2014.10.004">https://doi.org/10.1016/j.ophtha.2014.10.004</a> | 110 | 148  |
| hwang (2015)            | 9  | <a href="https://doi.org/10.1016/j.ophtha.2014.12.017">https://doi.org/10.1016/j.ophtha.2014.12.017</a> | 64  | 133  |
| silva (2015b)           | 2  | <a href="https://doi.org/10.1016/j.ophtha.2015.01.008">https://doi.org/10.1016/j.ophtha.2015.01.008</a> | 91  | 157  |
| fram (2015)             | 10 | <a href="https://doi.org/10.1016/j.ophtha.2015.01.027">https://doi.org/10.1016/j.ophtha.2015.01.027</a> | 30  | 54   |
| ishibashi (2015)        | 2  | <a href="https://doi.org/10.1016/j.ophtha.2015.02.006">https://doi.org/10.1016/j.ophtha.2015.02.006</a> | 166 | 110  |
| thomsen (2015)          | 6  | <a href="https://doi.org/10.1016/j.ophtha.2015.02.028">https://doi.org/10.1016/j.ophtha.2015.02.028</a> | 3   | 61   |
| das (2015)              | 2  | <a href="https://doi.org/10.1016/j.ophtha.2015.03.024">https://doi.org/10.1016/j.ophtha.2015.03.024</a> | 169 | 277  |
| lindner (2015)          | 4  | <a href="https://doi.org/10.1016/j.ophtha.2015.03.027">https://doi.org/10.1016/j.ophtha.2015.03.027</a> | 91  | 77   |
| campochiaro (2015a)     | 2  | <a href="https://doi.org/10.1016/j.ophtha.2015.04.006">https://doi.org/10.1016/j.ophtha.2015.04.006</a> | 132 | 66   |
| arora (2015)            | 5  | <a href="https://doi.org/10.1016/j.ophtha.2015.04.015">https://doi.org/10.1016/j.ophtha.2015.04.015</a> | 12  | 150  |
| brown (2015)            | 2  | <a href="https://doi.org/10.1016/j.ophtha.2015.06.017">https://doi.org/10.1016/j.ophtha.2015.06.017</a> | 147 | 323  |
| silva (2015a)           | 2  | <a href="https://doi.org/10.1016/j.ophtha.2015.07.034">https://doi.org/10.1016/j.ophtha.2015.07.034</a> | 24  | 128  |
| boyer (2015)            | 2  | <a href="https://doi.org/10.1016/j.ophtha.2015.08.006">https://doi.org/10.1016/j.ophtha.2015.08.006</a> | 118 | 95   |
| vianna (2015)           | 3  | <a href="https://doi.org/10.1016/j.ophtha.2015.08.020">https://doi.org/10.1016/j.ophtha.2015.08.020</a> | 20  | 56   |
| wang (2015)             | 10 | <a href="https://doi.org/10.1016/j.ophtha.2015.08.037">https://doi.org/10.1016/j.ophtha.2015.08.037</a> | 28  | 84   |
| li (2016)               | 5  | <a href="https://doi.org/10.1016/j.ophtha.2015.09.005">https://doi.org/10.1016/j.ophtha.2015.09.005</a> | 17  | 151  |
| clark (2016)            | 2  | <a href="https://doi.org/10.1016/j.ophtha.2015.09.035">https://doi.org/10.1016/j.ophtha.2015.09.035</a> | 98  | 146  |
| mir (2016)              | 2  | <a href="https://doi.org/10.1016/j.ophtha.2015.10.030">https://doi.org/10.1016/j.ophtha.2015.10.030</a> | 59  | 52   |
| malik (2016)            | 3  | <a href="https://doi.org/10.1016/j.ophtha.2016.01.052">https://doi.org/10.1016/j.ophtha.2016.01.052</a> | 35  | 53   |
| wells (2016)            | 2  | <a href="https://doi.org/10.1016/j.ophtha.2016.02.022">https://doi.org/10.1016/j.ophtha.2016.02.022</a> | 61  | 387  |
| tadayoni (2016)         | 2  | <a href="https://doi.org/10.1016/j.ophtha.2016.02.030">https://doi.org/10.1016/j.ophtha.2016.02.030</a> | 44  | 66   |
| mintz-hittner (2016)    | 9  | <a href="https://doi.org/10.1016/j.ophtha.2016.04.028">https://doi.org/10.1016/j.ophtha.2016.04.028</a> | 56  | 96   |
| alfawaz (2016)          | 5  | <a href="https://doi.org/10.1016/j.ophtha.2016.04.036">https://doi.org/10.1016/j.ophtha.2016.04.036</a> | 12  | 52   |
| asaoka (2016)           | 6  | <a href="https://doi.org/10.1016/j.ophtha.2016.05.029">https://doi.org/10.1016/j.ophtha.2016.05.029</a> | 1   | 126  |
| popovic (2016)          | 6  | <a href="https://doi.org/10.1016/j.ophtha.2016.07.005">https://doi.org/10.1016/j.ophtha.2016.07.005</a> | 51  | 107  |
| chidambaram (2016)      | 7  | <a href="https://doi.org/10.1016/j.ophtha.2016.07.009">https://doi.org/10.1016/j.ophtha.2016.07.009</a> | 13  | 58   |
| heier (2016)            | 2  | <a href="https://doi.org/10.1016/j.ophtha.2016.07.032">https://doi.org/10.1016/j.ophtha.2016.07.032</a> | 116 | 216  |
| yarmohammadi (2016)     | 3  | <a href="https://doi.org/10.1016/j.ophtha.2016.08.041">https://doi.org/10.1016/j.ophtha.2016.08.041</a> | 29  | 257  |
| schoenberger (2017)     | 5  | <a href="https://doi.org/10.1016/j.ophtha.2016.11.007">https://doi.org/10.1016/j.ophtha.2016.11.007</a> | 14  | 97   |
| holz (2017)             | 4  | <a href="https://doi.org/10.1016/j.ophtha.2016.12.002">https://doi.org/10.1016/j.ophtha.2016.12.002</a> | 104 | 109  |
| bressler (2017)         | 2  | <a href="https://doi.org/10.1016/j.ophtha.2016.12.005">https://doi.org/10.1016/j.ophtha.2016.12.005</a> | 57  | 55   |
| vanderveen (2017)       | 9  | <a href="https://doi.org/10.1016/j.ophtha.2016.12.025">https://doi.org/10.1016/j.ophtha.2016.12.025</a> | 64  | 79   |
| mclaughlin (2017)       | 2  | <a href="https://doi.org/10.1016/j.ophtha.2017.01.001">https://doi.org/10.1016/j.ophtha.2017.01.001</a> | 43  | 67   |
| garcia-martin (2017)    | 3  | <a href="https://doi.org/10.1016/j.ophtha.2017.01.005">https://doi.org/10.1016/j.ophtha.2017.01.005</a> | 1   | 51   |
| liu (2017)              | 6  | <a href="https://doi.org/10.1016/j.ophtha.2017.01.053">https://doi.org/10.1016/j.ophtha.2017.01.053</a> | 23  | 52   |
| schlenker (2017)        | 5  | <a href="https://doi.org/10.1016/j.ophtha.2017.05.004">https://doi.org/10.1016/j.ophtha.2017.05.004</a> | 11  | 159  |
| tadayoni (2017)         | 2  | <a href="https://doi.org/10.1016/j.ophtha.2017.06.027">https://doi.org/10.1016/j.ophtha.2017.06.027</a> | 23  | 66   |
| lepore (2018)           | 9  | <a href="https://doi.org/10.1016/j.ophtha.2017.08.005">https://doi.org/10.1016/j.ophtha.2017.08.005</a> | 59  | 58   |

|                         |    |                                                                                                                     |     |     |
|-------------------------|----|---------------------------------------------------------------------------------------------------------------------|-----|-----|
| zur (2018)              | 2  | <a href="https://doi.org/10.1016/j.ophtha.2017.08.031">https://doi.org/10.1016/j.ophtha.2017.08.031</a>             | 91  | 112 |
| yarmohammadi (2018)     | 3  | <a href="https://doi.org/10.1016/j.ophtha.2017.10.029">https://doi.org/10.1016/j.ophtha.2017.10.029</a>             | 40  | 77  |
| wong (2018)             | 2  | <a href="https://doi.org/10.1016/j.ophtha.2018.04.007">https://doi.org/10.1016/j.ophtha.2018.04.007</a>             | 117 | 239 |
| van dijk (2018)         | 2  | <a href="https://doi.org/10.1016/j.ophtha.2018.04.021">https://doi.org/10.1016/j.ophtha.2018.04.021</a>             | 10  | 121 |
| wallace (2018)          | 9  | <a href="https://doi.org/10.1016/j.ophtha.2018.05.001">https://doi.org/10.1016/j.ophtha.2018.05.001</a>             | 43  | 125 |
| guymer (2019)           | 4  | <a href="https://doi.org/10.1016/j.ophtha.2018.09.015">https://doi.org/10.1016/j.ophtha.2018.09.015</a>             | 35  | 92  |
| christopher (2020)      | 3  | <a href="https://doi.org/10.1016/j.ophtha.2019.09.036">https://doi.org/10.1016/j.ophtha.2019.09.036</a>             | 13  | 51  |
| ciulla (2018)           | 2  | <a href="https://doi.org/10.1016/j.oret.2018.06.004">https://doi.org/10.1016/j.oret.2018.06.004</a>                 | 129 | 62  |
| van velthoven (2007)    | 3  | <a href="https://doi.org/10.1016/j.preteyeres.2006.10.002">https://doi.org/10.1016/j.preteyeres.2006.10.002</a>     | 241 | 246 |
| rohrschneider (2008)    | 4  | <a href="https://doi.org/10.1016/j.preteyeres.2008.07.003">https://doi.org/10.1016/j.preteyeres.2008.07.003</a>     | 58  | 153 |
| pircher (2011)          | 3  | <a href="https://doi.org/10.1016/j.preteyeres.2011.06.003">https://doi.org/10.1016/j.preteyeres.2011.06.003</a>     | 366 | 185 |
| dysli (2017)            | 4  | <a href="https://doi.org/10.1016/j.preteyeres.2017.06.005">https://doi.org/10.1016/j.preteyeres.2017.06.005</a>     | 46  | 110 |
| al-aqaba (2019)         | 7  | <a href="https://doi.org/10.1016/j.preteyeres.2019.05.003">https://doi.org/10.1016/j.preteyeres.2019.05.003</a>     | 231 | 89  |
| ebrahim (2005)          | 4  | <a href="https://doi.org/10.1016/j.survophthal.2004.12.006">https://doi.org/10.1016/j.survophthal.2004.12.006</a>   | 8   | 118 |
| silverman (2010)        | 3  | <a href="https://doi.org/10.1016/j.ultrasmedbio.2010.02.006">https://doi.org/10.1016/j.ultrasmedbio.2010.02.006</a> | 47  | 62  |
| fercher (2010)          | 3  | <a href="https://doi.org/10.1016/j.zemedi.2009.11.002">https://doi.org/10.1016/j.zemedi.2009.11.002</a>             | 378 | 162 |
| schuman (2003)          | 3  | <a href="https://doi.org/10.1016/s0002-9394(02)02093-7">https://doi.org/10.1016/s0002-9394(02)02093-7</a>           | 133 | 124 |
| aiello (2003)           | 2  | <a href="https://doi.org/10.1016/s0002-9394(03)00219-8">https://doi.org/10.1016/s0002-9394(03)00219-8</a>           | 179 | 174 |
| rohrschneider (1998)    | 4  | <a href="https://doi.org/10.1016/s0002-9394(98)00065-8">https://doi.org/10.1016/s0002-9394(98)00065-8</a>           | 24  | 53  |
| pitsillides (2003)      | 6  | <a href="https://doi.org/10.1016/s0006-3495(03)75128-5">https://doi.org/10.1016/s0006-3495(03)75128-5</a>           | 13  | 587 |
| desmettre (2000)        | 4  | <a href="https://doi.org/10.1016/s0039-6257(00)00123-5">https://doi.org/10.1016/s0039-6257(00)00123-5</a>           | 40  | 504 |
| ciulla (1998)           | 4  | <a href="https://doi.org/10.1016/s0039-6257(98)00014-9">https://doi.org/10.1016/s0039-6257(98)00014-9</a>           | 130 | 91  |
| owsley (1999)           | 1  | <a href="https://doi.org/10.1016/s0039-6257(99)00035-1">https://doi.org/10.1016/s0039-6257(99)00035-1</a>           | 41  | 183 |
| moshfeghi (2000)        | 8  | <a href="https://doi.org/10.1016/s0039-6257(99)00112-5">https://doi.org/10.1016/s0039-6257(99)00112-5</a>           | 32  | 131 |
| dorner (2003)           | 2  | <a href="https://doi.org/10.1016/s0042-6989(03)00170-6">https://doi.org/10.1016/s0042-6989(03)00170-6</a>           | 3   | 57  |
| keech (2007)            | 2  | <a href="https://doi.org/10.1016/s0140-6736(07)61607-9">https://doi.org/10.1016/s0140-6736(07)61607-9</a>           | 97  | 709 |
| tan (2012)              | 7  | <a href="https://doi.org/10.1016/s0140-6736(12)60437-1">https://doi.org/10.1016/s0140-6736(12)60437-1</a>           | 8   | 464 |
| gazzard (2019)          | 5  | <a href="https://doi.org/10.1016/s0140-6736(18)32213-x">https://doi.org/10.1016/s0140-6736(18)32213-x</a>           | 37  | 196 |
| tham (2000)             | 4  | <a href="https://doi.org/10.1016/s0161-6420(00)00004-x">https://doi.org/10.1016/s0161-6420(00)00004-x</a>           | 133 | 91  |
| slakter (2000)          | 4  | <a href="https://doi.org/10.1016/s0161-6420(00)00009-9">https://doi.org/10.1016/s0161-6420(00)00009-9</a>           | 35  | 138 |
| lee (2000b)             | 8  | <a href="https://doi.org/10.1016/s0161-6420(00)00016-6">https://doi.org/10.1016/s0161-6420(00)00016-6</a>           | 15  | 61  |
| rauz (2000)             | 8  | <a href="https://doi.org/10.1016/s0161-6420(00)00056-7">https://doi.org/10.1016/s0161-6420(00)00056-7</a>           | 23  | 55  |
| hersh (2000)            | 1  | <a href="https://doi.org/10.1016/s0161-6420(00)00059-2">https://doi.org/10.1016/s0161-6420(00)00059-2</a>           | 68  | 66  |
| knorz (2000)            | 1  | <a href="https://doi.org/10.1016/s0161-6420(00)00094-4">https://doi.org/10.1016/s0161-6420(00)00094-4</a>           | 33  | 95  |
| zadok (2000)            | 1  | <a href="https://doi.org/10.1016/s0161-6420(00)00097-x">https://doi.org/10.1016/s0161-6420(00)00097-x</a>           | 47  | 50  |
| aung (2000)             | 5  | <a href="https://doi.org/10.1016/s0161-6420(00)00137-8">https://doi.org/10.1016/s0161-6420(00)00137-8</a>           | 69  | 54  |
| moller-pedersen (2000)  | 1  | <a href="https://doi.org/10.1016/s0161-6420(00)00142-1">https://doi.org/10.1016/s0161-6420(00)00142-1</a>           | 84  | 220 |
| vitale (2000)           | 1  | <a href="https://doi.org/10.1016/s0161-6420(00)00171-8">https://doi.org/10.1016/s0161-6420(00)00171-8</a>           | 33  | 88  |
| holland (2000a)         | 1  | <a href="https://doi.org/10.1016/s0161-6420(00)00246-3">https://doi.org/10.1016/s0161-6420(00)00246-3</a>           | 14  | 124 |
| mutyala (2000)          | 1  | <a href="https://doi.org/10.1016/s0161-6420(00)00355-9">https://doi.org/10.1016/s0161-6420(00)00355-9</a>           | 49  | 90  |
| ang (2000)              | 5  | <a href="https://doi.org/10.1016/s0161-6420(00)00360-2">https://doi.org/10.1016/s0161-6420(00)00360-2</a>           | 40  | 127 |
| wollstein (2000)        | 3  | <a href="https://doi.org/10.1016/s0161-6420(00)00363-8">https://doi.org/10.1016/s0161-6420(00)00363-8</a>           | 72  | 130 |
| alsagoff (2000)         | 5  | <a href="https://doi.org/10.1016/s0161-6420(00)00385-7">https://doi.org/10.1016/s0161-6420(00)00385-7</a>           | 45  | 147 |
| yu (2000)               | 1  | <a href="https://doi.org/10.1016/s0161-6420(00)00388-2">https://doi.org/10.1016/s0161-6420(00)00388-2</a>           | 48  | 126 |
| jimenez-alfaro (2001)   | 1  | <a href="https://doi.org/10.1016/s0161-6420(00)00403-6">https://doi.org/10.1016/s0161-6420(00)00403-6</a>           | 73  | 150 |
| melki (2000)            | 1  | <a href="https://doi.org/10.1016/s0161-6420(00)00405-x">https://doi.org/10.1016/s0161-6420(00)00405-x</a>           | 91  | 74  |
| durairaj (2000)         | 1  | <a href="https://doi.org/10.1016/s0161-6420(00)00407-3">https://doi.org/10.1016/s0161-6420(00)00407-3</a>           | 65  | 85  |
| mccabe (2000)           | 4  | <a href="https://doi.org/10.1016/s0161-6420(00)00422-x">https://doi.org/10.1016/s0161-6420(00)00422-x</a>           | 29  | 56  |
| garg (2001)             | 1  | <a href="https://doi.org/10.1016/s0161-6420(00)00435-8">https://doi.org/10.1016/s0161-6420(00)00435-8</a>           | 73  | 77  |
| baek (2001)             | 1  | <a href="https://doi.org/10.1016/s0161-6420(00)00502-9">https://doi.org/10.1016/s0161-6420(00)00502-9</a>           | 114 | 136 |
| quinn (2001)            | 9  | <a href="https://doi.org/10.1016/s0161-6420(00)00527-3">https://doi.org/10.1016/s0161-6420(00)00527-3</a>           | 25  | 63  |
| lass (2001)             | 5  | <a href="https://doi.org/10.1016/s0161-6420(00)00531-5">https://doi.org/10.1016/s0161-6420(00)00531-5</a>           | 16  | 76  |
| cameron (2001)          | 1  | <a href="https://doi.org/10.1016/s0161-6420(00)00577-7">https://doi.org/10.1016/s0161-6420(00)00577-7</a>           | 2   | 77  |
| seitz (2001)            | 1  | <a href="https://doi.org/10.1016/s0161-6420(00)00581-9">https://doi.org/10.1016/s0161-6420(00)00581-9</a>           | 230 | 149 |
| apple (2001)            | 8  | <a href="https://doi.org/10.1016/s0161-6420(00)00589-3">https://doi.org/10.1016/s0161-6420(00)00589-3</a>           | 60  | 224 |
| lois (2001)             | 5  | <a href="https://doi.org/10.1016/s0161-6420(00)00642-4">https://doi.org/10.1016/s0161-6420(00)00642-4</a>           | 19  | 51  |
| choplin (2001)          | 3  | <a href="https://doi.org/10.1016/s0161-6420(00)00652-7">https://doi.org/10.1016/s0161-6420(00)00652-7</a>           | 16  | 55  |
| kramer (2001)           | 5  | <a href="https://doi.org/10.1016/s0161-6420(00)00660-6">https://doi.org/10.1016/s0161-6420(00)00660-6</a>           | 35  | 190 |
| parsa (2001)            | 3  | <a href="https://doi.org/10.1016/s0161-6420(00)00661-8">https://doi.org/10.1016/s0161-6420(00)00661-8</a>           | 3   | 61  |
| krueger (2001b)         | 1  | <a href="https://doi.org/10.1016/s0161-6420(01)00570-x">https://doi.org/10.1016/s0161-6420(01)00570-x</a>           | 35  | 55  |
| sidoti (2001)           | 5  | <a href="https://doi.org/10.1016/s0161-6420(01)00583-8">https://doi.org/10.1016/s0161-6420(01)00583-8</a>           | 21  | 79  |
| brandt (2001)           | 5  | <a href="https://doi.org/10.1016/s0161-6420(01)00584-x">https://doi.org/10.1016/s0161-6420(01)00584-x</a>           | 9   | 125 |
| wilson (2001)           | 1  | <a href="https://doi.org/10.1016/s0161-6420(01)00587-5">https://doi.org/10.1016/s0161-6420(01)00587-5</a>           | 25  | 120 |
| battat (2001)           | 1  | <a href="https://doi.org/10.1016/s0161-6420(01)00623-6">https://doi.org/10.1016/s0161-6420(01)00623-6</a>           | 81  | 188 |
| jain (2001)             | 1  | <a href="https://doi.org/10.1016/s0161-6420(01)00647-9">https://doi.org/10.1016/s0161-6420(01)00647-9</a>           | 2   | 110 |
| miglior (2001)          | 3  | <a href="https://doi.org/10.1016/s0161-6420(01)00676-5">https://doi.org/10.1016/s0161-6420(01)00676-5</a>           | 137 | 59  |
| carones (2001)          | 1  | <a href="https://doi.org/10.1016/s0161-6420(01)00715-1">https://doi.org/10.1016/s0161-6420(01)00715-1</a>           | 109 | 59  |
| sanchez-galeana (2001)  | 3  | <a href="https://doi.org/10.1016/s0161-6420(01)00768-0">https://doi.org/10.1016/s0161-6420(01)00768-0</a>           | 84  | 111 |
| pisella (2001)          | 1  | <a href="https://doi.org/10.1016/s0161-6420(01)00771-0">https://doi.org/10.1016/s0161-6420(01)00771-0</a>           | 88  | 97  |
| sivak-callcott (2001)   | 5  | <a href="https://doi.org/10.1016/s0161-6420(01)00775-8">https://doi.org/10.1016/s0161-6420(01)00775-8</a>           | 42  | 169 |
| shields (2001b)         | 8  | <a href="https://doi.org/10.1016/s0161-6420(01)00797-7">https://doi.org/10.1016/s0161-6420(01)00797-7</a>           | 8   | 111 |
| shields (2001a)         | 4  | <a href="https://doi.org/10.1016/s0161-6420(01)00812-0">https://doi.org/10.1016/s0161-6420(01)00812-0</a>           | 51  | 149 |
| krueger (2001a)         | 6  | <a href="https://doi.org/10.1016/s0161-6420(01)00834-x">https://doi.org/10.1016/s0161-6420(01)00834-x</a>           | 2   | 65  |
| tan (2001)              | 8  | <a href="https://doi.org/10.1016/s0161-6420(01)00839-9">https://doi.org/10.1016/s0161-6420(01)00839-9</a>           | 13  | 61  |
| laidlaw (2002)          | 19 | <a href="https://doi.org/10.1016/s0161-6420(01)00848-x">https://doi.org/10.1016/s0161-6420(01)00848-x</a>           | 0   | 55  |
| lam (2002)              | 5  | <a href="https://doi.org/10.1016/s0161-6420(01)00857-0">https://doi.org/10.1016/s0161-6420(01)00857-0</a>           | 10  | 52  |
| pastor (2001)           | 5  | <a href="https://doi.org/10.1016/s0161-6420(01)00889-2">https://doi.org/10.1016/s0161-6420(01)00889-2</a>           | 61  | 124 |
| kirwan (2002)           | 5  | <a href="https://doi.org/10.1016/s0161-6420(01)00898-3">https://doi.org/10.1016/s0161-6420(01)00898-3</a>           | 34  | 84  |
| jensen (2002)           | 8  | <a href="https://doi.org/10.1016/s0161-6420(01)00950-2">https://doi.org/10.1016/s0161-6420(01)00950-2</a>           | 9   | 55  |
| sugar (2002)            | 1  | <a href="https://doi.org/10.1016/s0161-6420(01)00966-6">https://doi.org/10.1016/s0161-6420(01)00966-6</a>           | 381 | 292 |
| hamed (2002)            | 10 | <a href="https://doi.org/10.1016/s0161-6420(01)01001-6">https://doi.org/10.1016/s0161-6420(01)01001-6</a>           | 18  | 116 |
| connolly (2002)         | 9  | <a href="https://doi.org/10.1016/s0161-6420(01)01015-6">https://doi.org/10.1016/s0161-6420(01)01015-6</a>           | 18  | 115 |
| ng (2002)               | 9  | <a href="https://doi.org/10.1016/s0161-6420(01)01017-x">https://doi.org/10.1016/s0161-6420(01)01017-x</a>           | 27  | 123 |
| hamilton (2002)         | 1  | <a href="https://doi.org/10.1016/s0161-6420(01)01023-5">https://doi.org/10.1016/s0161-6420(01)01023-5</a>           | 17  | 81  |
| sridhar (2002)          | 1  | <a href="https://doi.org/10.1016/s0161-6420(01)01027-2">https://doi.org/10.1016/s0161-6420(01)01027-2</a>           | 8   | 66  |
| el danasoury (2002)     | 1  | <a href="https://doi.org/10.1016/s0161-6420(02)00964-8">https://doi.org/10.1016/s0161-6420(02)00964-8</a>           | 117 | 85  |
| song (2002)             | 5  | <a href="https://doi.org/10.1016/s0161-6420(02)00965-x">https://doi.org/10.1016/s0161-6420(02)00965-x</a>           | 17  | 128 |
| martidis (2002)         | 2  | <a href="https://doi.org/10.1016/s0161-6420(02)00975-2">https://doi.org/10.1016/s0161-6420(02)00975-2</a>           | 62  | 696 |
| oshika (2002)           | 1  | <a href="https://doi.org/10.1016/s0161-6420(02)01028-x">https://doi.org/10.1016/s0161-6420(02)01028-x</a>           | 92  | 132 |
| miglior (2002)          | 3  | <a href="https://doi.org/10.1016/s0161-6420(02)01032-1">https://doi.org/10.1016/s0161-6420(02)01032-1</a>           | 75  | 68  |
| schmidt-erfurth (2002b) | 4  | <a href="https://doi.org/10.1016/s0161-6420(02)01059-x">https://doi.org/10.1016/s0161-6420(02)01059-x</a>           | 60  | 98  |
| stanga (2002)           | 3  | <a href="https://doi.org/10.1016/s0161-6420(02)01099-0">https://doi.org/10.1016/s0161-6420(02)01099-0</a>           | 73  | 95  |

|                            |    |                                                                                                           |     |     |
|----------------------------|----|-----------------------------------------------------------------------------------------------------------|-----|-----|
| saperstein (2002)          | 4  | <a href="https://doi.org/10.1016/s0161-6420(02)01103-x">https://doi.org/10.1016/s0161-6420(02)01103-x</a> | 45  | 60  |
| erie (2002)                | 1  | <a href="https://doi.org/10.1016/s0161-6420(02)01106-5">https://doi.org/10.1016/s0161-6420(02)01106-5</a> | 101 | 106 |
| moore (2002)               | 12 | <a href="https://doi.org/10.1016/s0161-6420(02)01114-4">https://doi.org/10.1016/s0161-6420(02)01114-4</a> | 11  | 97  |
| bernstein (2002)           | 4  | <a href="https://doi.org/10.1016/s0161-6420(02)01173-9">https://doi.org/10.1016/s0161-6420(02)01173-9</a> | 28  | 193 |
| singh (2002)               | 4  | <a href="https://doi.org/10.1016/s0161-6420(02)01177-6">https://doi.org/10.1016/s0161-6420(02)01177-6</a> | 30  | 99  |
| davis (2002)               | 1  | <a href="https://doi.org/10.1016/s0161-6420(02)01245-9">https://doi.org/10.1016/s0161-6420(02)01245-9</a> | 35  | 50  |
| mcdonald (2002)            | 1  | <a href="https://doi.org/10.1016/s0161-6420(02)01255-1">https://doi.org/10.1016/s0161-6420(02)01255-1</a> | 31  | 69  |
| prisant (2003)             | 1  | <a href="https://doi.org/10.1016/s0161-6420(02)01298-8">https://doi.org/10.1016/s0161-6420(02)01298-8</a> | 59  | 81  |
| dick (2003)                | 1  | <a href="https://doi.org/10.1016/s0161-6420(02)01447-1">https://doi.org/10.1016/s0161-6420(02)01447-1</a> | 92  | 107 |
| schmidt-erfurth (2002a)    | 4  | <a href="https://doi.org/10.1016/s0161-6420(02)01454-9">https://doi.org/10.1016/s0161-6420(02)01454-9</a> | 80  | 102 |
| stanga (2003)              | 4  | <a href="https://doi.org/10.1016/s0161-6420(02)01563-4">https://doi.org/10.1016/s0161-6420(02)01563-4</a> | 40  | 203 |
| freitas (2003)             | 1  | <a href="https://doi.org/10.1016/s0161-6420(02)01643-3">https://doi.org/10.1016/s0161-6420(02)01643-3</a> | 120 | 91  |
| randleman (2003)           | 1  | <a href="https://doi.org/10.1016/s0161-6420(02)01727-x">https://doi.org/10.1016/s0161-6420(02)01727-x</a> | 85  | 467 |
| chan (2003)                | 17 | <a href="https://doi.org/10.1016/s0161-6420(02)01737-2">https://doi.org/10.1016/s0161-6420(02)01737-2</a> | 0   | 70  |
| spaide (2003)              | 4  | <a href="https://doi.org/10.1016/s0161-6420(02)01756-6">https://doi.org/10.1016/s0161-6420(02)01756-6</a> | 38  | 180 |
| karp (2003)                | 1  | <a href="https://doi.org/10.1016/s0161-6420(02)01760-8">https://doi.org/10.1016/s0161-6420(02)01760-8</a> | 74  | 83  |
| vukich (2003)              | 1  | <a href="https://doi.org/10.1016/s0161-6420(02)01771-2">https://doi.org/10.1016/s0161-6420(02)01771-2</a> | 87  | 196 |
| choplin (2003)             | 3  | <a href="https://doi.org/10.1016/s0161-6420(02)01899-7">https://doi.org/10.1016/s0161-6420(02)01899-7</a> | 34  | 63  |
| donnenfeld (2003)          | 1  | <a href="https://doi.org/10.1016/s0161-6420(02)01936-x">https://doi.org/10.1016/s0161-6420(02)01936-x</a> | 110 | 60  |
| terry (2003)               | 6  | <a href="https://doi.org/10.1016/s0161-6420(02)01939-5">https://doi.org/10.1016/s0161-6420(02)01939-5</a> | 19  | 133 |
| porrini (2003)             | 4  | <a href="https://doi.org/10.1016/s0161-6420(02)01968-1">https://doi.org/10.1016/s0161-6420(02)01968-1</a> | 70  | 70  |
| chen (2003)                | 5  | <a href="https://doi.org/10.1016/s0161-6420(02)01974-7">https://doi.org/10.1016/s0161-6420(02)01974-7</a> | 60  | 130 |
| hersh (2003)               | 1  | <a href="https://doi.org/10.1016/s0161-6420(02)01981-4">https://doi.org/10.1016/s0161-6420(02)01981-4</a> | 47  | 105 |
| ford (2003)                | 3  | <a href="https://doi.org/10.1016/s0161-6420(03)00230-6">https://doi.org/10.1016/s0161-6420(03)00230-6</a> | 73  | 99  |
| saxena (2003)              | 1  | <a href="https://doi.org/10.1016/s0161-6420(03)00405-6">https://doi.org/10.1016/s0161-6420(03)00405-6</a> | 27  | 54  |
| bailey (2003)              | 1  | <a href="https://doi.org/10.1016/s0161-6420(03)00455-x">https://doi.org/10.1016/s0161-6420(03)00455-x</a> | 82  | 108 |
| yoshida (2003)             | 4  | <a href="https://doi.org/10.1016/s0161-6420(03)00461-5">https://doi.org/10.1016/s0161-6420(03)00461-5</a> | 20  | 241 |
| reus (2003)                | 3  | <a href="https://doi.org/10.1016/s0161-6420(03)00479-2">https://doi.org/10.1016/s0161-6420(03)00479-2</a> | 34  | 53  |
| schallhorn (2003)          | 1  | <a href="https://doi.org/10.1016/s0161-6420(03)00494-9">https://doi.org/10.1016/s0161-6420(03)00494-9</a> | 56  | 106 |
| javitt (2003)              | 4  | <a href="https://doi.org/10.1016/s0161-6420(03)00495-0">https://doi.org/10.1016/s0161-6420(03)00495-0</a> | 15  | 83  |
| saw (2003)                 | 5  | <a href="https://doi.org/10.1016/s0161-6420(03)00540-2">https://doi.org/10.1016/s0161-6420(03)00540-2</a> | 58  | 89  |
| ritch (2003)               | 5  | <a href="https://doi.org/10.1016/s0161-6420(03)00563-3">https://doi.org/10.1016/s0161-6420(03)00563-3</a> | 26  | 76  |
| chew (2003)                | 2  | <a href="https://doi.org/10.1016/s0161-6420(03)00579-7">https://doi.org/10.1016/s0161-6420(03)00579-7</a> | 39  | 103 |
| pereira (2003)             | 5  | <a href="https://doi.org/10.1016/s0161-6420(03)00623-7">https://doi.org/10.1016/s0161-6420(03)00623-7</a> | 32  | 86  |
| seitz (2003)               | 6  | <a href="https://doi.org/10.1016/s0161-6420(03)00659-6">https://doi.org/10.1016/s0161-6420(03)00659-6</a> | 10  | 85  |
| fernandez-vega (2003)      | 1  | <a href="https://doi.org/10.1016/s0161-6420(03)00794-2">https://doi.org/10.1016/s0161-6420(03)00794-2</a> | 22  | 63  |
| nicolela (2003)            | 3  | <a href="https://doi.org/10.1016/s0161-6420(03)00801-7">https://doi.org/10.1016/s0161-6420(03)00801-7</a> | 16  | 56  |
| el beltagi (2003)          | 3  | <a href="https://doi.org/10.1016/s0161-6420(03)00860-1">https://doi.org/10.1016/s0161-6420(03)00860-1</a> | 69  | 111 |
| byrnes (1995)              | 5  | <a href="https://doi.org/10.1016/s0161-6420(95)30870-6">https://doi.org/10.1016/s0161-6420(95)30870-6</a> | 8   | 66  |
| bressler (1995)            | 4  | <a href="https://doi.org/10.1016/s0161-6420(95)30889-5">https://doi.org/10.1016/s0161-6420(95)30889-5</a> | 52  | 58  |
| cohen (1996)               | 4  | <a href="https://doi.org/10.1016/s0161-6420(96)30515-0">https://doi.org/10.1016/s0161-6420(96)30515-0</a> | 10  | 270 |
| naumann (1998)             | 3  | <a href="https://doi.org/10.1016/s0161-6420(98)96020-1">https://doi.org/10.1016/s0161-6420(98)96020-1</a> | 10  | 357 |
| garcia-arumi (2000b)       | 4  | <a href="https://doi.org/10.1016/s0161-6420(99)00018-4">https://doi.org/10.1016/s0161-6420(99)00018-4</a> | 23  | 51  |
| maldonado (2000)           | 1  | <a href="https://doi.org/10.1016/s0161-6420(99)00022-6">https://doi.org/10.1016/s0161-6420(99)00022-6</a> | 141 | 176 |
| banach (2000)              | 9  | <a href="https://doi.org/10.1016/s0161-6420(99)00042-1">https://doi.org/10.1016/s0161-6420(99)00042-1</a> | 24  | 62  |
| pop (2000)                 | 1  | <a href="https://doi.org/10.1016/s0161-6420(99)00043-3">https://doi.org/10.1016/s0161-6420(99)00043-3</a> | 109 | 62  |
| garcia-arumi (2000a)       | 4  | <a href="https://doi.org/10.1016/s0161-6420(99)00046-9">https://doi.org/10.1016/s0161-6420(99)00046-9</a> | 32  | 60  |
| arevalo (2000)             | 1  | <a href="https://doi.org/10.1016/s0161-6420(99)00078-0">https://doi.org/10.1016/s0161-6420(99)00078-0</a> | 35  | 80  |
| dick (2000)                | 8  | <a href="https://doi.org/10.1016/s0161-6420(99)00082-2">https://doi.org/10.1016/s0161-6420(99)00082-2</a> | 23  | 61  |
| harris (2000)              | 4  | <a href="https://doi.org/10.1016/s0161-6420(99)00093-7">https://doi.org/10.1016/s0161-6420(99)00093-7</a> | 1   | 64  |
| holland (2000b)            | 1  | <a href="https://doi.org/10.1016/s0161-6420(99)00131-1">https://doi.org/10.1016/s0161-6420(99)00131-1</a> | 68  | 108 |
| felt (1999)                | 21 | <a href="https://doi.org/10.1016/s0378-5173(99)00003-4">https://doi.org/10.1016/s0378-5173(99)00003-4</a> | 0   | 284 |
| kruger (2000)              | 8  | <a href="https://doi.org/10.1016/s0886-3350(00)00323-0">https://doi.org/10.1016/s0886-3350(00)00323-0</a> | 19  | 90  |
| schnitzler (2000)          | 1  | <a href="https://doi.org/10.1016/s0886-3350(00)00486-7">https://doi.org/10.1016/s0886-3350(00)00486-7</a> | 30  | 71  |
| perez-santonja (2000)      | 1  | <a href="https://doi.org/10.1016/s0886-3350(00)00543-5">https://doi.org/10.1016/s0886-3350(00)00543-5</a> | 167 | 78  |
| lee (2000a)                | 1  | <a href="https://doi.org/10.1016/s0886-3350(00)00566-6">https://doi.org/10.1016/s0886-3350(00)00566-6</a> | 84  | 91  |
| shah (2000)                | 1  | <a href="https://doi.org/10.1016/s0886-3350(00)00570-8">https://doi.org/10.1016/s0886-3350(00)00570-8</a> | 16  | 118 |
| yildirim (2000)            | 1  | <a href="https://doi.org/10.1016/s0886-3350(00)00639-8">https://doi.org/10.1016/s0886-3350(00)00639-8</a> | 59  | 103 |
| kwitko (2001)              | 1  | <a href="https://doi.org/10.1016/s0886-3350(00)00642-8">https://doi.org/10.1016/s0886-3350(00)00642-8</a> | 39  | 58  |
| findl (2001)               | 3  | <a href="https://doi.org/10.1016/s0886-3350(00)00699-4">https://doi.org/10.1016/s0886-3350(00)00699-4</a> | 154 | 131 |
| matsui (2001)              | 1  | <a href="https://doi.org/10.1016/s0886-3350(00)00756-2">https://doi.org/10.1016/s0886-3350(00)00756-2</a> | 34  | 68  |
| mrochen (2001b)            | 1  | <a href="https://doi.org/10.1016/s0886-3350(00)00806-3">https://doi.org/10.1016/s0886-3350(00)00806-3</a> | 107 | 200 |
| mrochen (2001c)            | 1  | <a href="https://doi.org/10.1016/s0886-3350(00)00827-0">https://doi.org/10.1016/s0886-3350(00)00827-0</a> | 68  | 178 |
| lee (2001)                 | 1  | <a href="https://doi.org/10.1016/s0886-3350(00)00880-4">https://doi.org/10.1016/s0886-3350(00)00880-4</a> | 94  | 150 |
| mrochen (2001a)            | 1  | <a href="https://doi.org/10.1016/s0886-3350(00)00884-1">https://doi.org/10.1016/s0886-3350(00)00884-1</a> | 55  | 55  |
| schauersberger (2001)      | 8  | <a href="https://doi.org/10.1016/s0886-3350(01)01019-7">https://doi.org/10.1016/s0886-3350(01)01019-7</a> | 41  | 56  |
| hosal (2002)               | 8  | <a href="https://doi.org/10.1016/s0886-3350(01)01028-8">https://doi.org/10.1016/s0886-3350(01)01028-8</a> | 27  | 56  |
| abela-formanek (2002)      | 8  | <a href="https://doi.org/10.1016/s0886-3350(01)01122-1">https://doi.org/10.1016/s0886-3350(01)01122-1</a> | 54  | 126 |
| uusitalo (2002)            | 1  | <a href="https://doi.org/10.1016/s0886-3350(01)01218-4">https://doi.org/10.1016/s0886-3350(01)01218-4</a> | 83  | 107 |
| montan (2002)              | 18 | <a href="https://doi.org/10.1016/s0886-3350(01)01270-6">https://doi.org/10.1016/s0886-3350(01)01270-6</a> | 0   | 129 |
| kiss (2002)                | 3  | <a href="https://doi.org/10.1016/s0886-3350(01)01272-x">https://doi.org/10.1016/s0886-3350(01)01272-x</a> | 148 | 53  |
| gokmen (2002)              | 1  | <a href="https://doi.org/10.1016/s0886-3350(02)01275-0">https://doi.org/10.1016/s0886-3350(02)01275-0</a> | 190 | 50  |
| nuijts (2002)              | 1  | <a href="https://doi.org/10.1016/s0886-3350(02)01511-0">https://doi.org/10.1016/s0886-3350(02)01511-0</a> | 90  | 65  |
| buecler (2003)             | 1  | <a href="https://doi.org/10.1016/s0886-3350(02)01638-3">https://doi.org/10.1016/s0886-3350(02)01638-3</a> | 68  | 93  |
| carones (2002)             | 1  | <a href="https://doi.org/10.1016/s0886-3350(02)01701-7">https://doi.org/10.1016/s0886-3350(02)01701-7</a> | 110 | 180 |
| lee (2003)                 | 1  | <a href="https://doi.org/10.1016/s0886-3350(02)01844-8">https://doi.org/10.1016/s0886-3350(02)01844-8</a> | 191 | 75  |
| autrata (2003)             | 1  | <a href="https://doi.org/10.1016/s0886-3350(02)01897-7">https://doi.org/10.1016/s0886-3350(02)01897-7</a> | 123 | 72  |
| sekundo (2003)             | 1  | <a href="https://doi.org/10.1016/s0886-3350(03)00062-2">https://doi.org/10.1016/s0886-3350(03)00062-2</a> | 86  | 68  |
| autrata (2004)             | 1  | <a href="https://doi.org/10.1016/s0886-3350(03)00417-6">https://doi.org/10.1016/s0886-3350(03)00417-6</a> | 91  | 52  |
| wirtitsch (2004)           | 3  | <a href="https://doi.org/10.1016/s0886-3350(03)00459-0">https://doi.org/10.1016/s0886-3350(03)00459-0</a> | 72  | 68  |
| aizawa (2003)              | 1  | <a href="https://doi.org/10.1016/s0886-3350(03)00472-3">https://doi.org/10.1016/s0886-3350(03)00472-3</a> | 114 | 59  |
| ranta (2004)               | 8  | <a href="https://doi.org/10.1016/s0886-3350(03)00558-3">https://doi.org/10.1016/s0886-3350(03)00558-3</a> | 19  | 58  |
| aramberri (2003)           | 10 | <a href="https://doi.org/10.1016/s0886-3350(03)00957-x">https://doi.org/10.1016/s0886-3350(03)00957-x</a> | 27  | 216 |
| galand (1996)              | 8  | <a href="https://doi.org/10.1016/s0886-3350(96)80042-3">https://doi.org/10.1016/s0886-3350(96)80042-3</a> | 10  | 63  |
| tetz (1996)                | 8  | <a href="https://doi.org/10.1016/s0886-3350(96)80120-9">https://doi.org/10.1016/s0886-3350(96)80120-9</a> | 18  | 61  |
| pallikaris (1997)          | 1  | <a href="https://doi.org/10.1016/s0886-3350(97)80149-6">https://doi.org/10.1016/s0886-3350(97)80149-6</a> | 110 | 100 |
| perezsantonja (1997)       | 1  | <a href="https://doi.org/10.1016/s0886-3350(97)80182-4">https://doi.org/10.1016/s0886-3350(97)80182-4</a> | 162 | 266 |
| farah (1998)               | 1  | <a href="https://doi.org/10.1016/s0886-3350(98)80056-4">https://doi.org/10.1016/s0886-3350(98)80056-4</a> | 158 | 217 |
| findl (1998a)              | 3  | <a href="https://doi.org/10.1016/s0886-3350(98)80102-8">https://doi.org/10.1016/s0886-3350(98)80102-8</a> | 182 | 102 |
| findl (1998b)              | 3  | <a href="https://doi.org/10.1016/s0886-3350(98)80103-x">https://doi.org/10.1016/s0886-3350(98)80103-x</a> | 145 | 65  |
| wiesinger-jendritza (1998) | 1  | <a href="https://doi.org/10.1016/s0886-3350(98)80196-x">https://doi.org/10.1016/s0886-3350(98)80196-x</a> | 40  | 55  |
| perez-santonja (1998)      | 1  | <a href="https://doi.org/10.1016/s0886-3350(98)80198-3">https://doi.org/10.1016/s0886-3350(98)80198-3</a> | 99  | 101 |

|                          |    |                                                                                                                         |     |      |
|--------------------------|----|-------------------------------------------------------------------------------------------------------------------------|-----|------|
| gunning (1998)           | 5  | <a href="https://doi.org/10.1016/s0886-3350(98)80227-7">https://doi.org/10.1016/s0886-3350(98)80227-7</a>               | 19  | 118  |
| alio (1998)              | 1  | <a href="https://doi.org/10.1016/s0886-3350(98)80256-3">https://doi.org/10.1016/s0886-3350(98)80256-3</a>               | 90  | 98   |
| kaufman (1998)           | 1  | <a href="https://doi.org/10.1016/s0886-3350(98)80347-7">https://doi.org/10.1016/s0886-3350(98)80347-7</a>               | 5   | 102  |
| yi (1999)                | 1  | <a href="https://doi.org/10.1016/s0886-3350(99)00139-x">https://doi.org/10.1016/s0886-3350(99)00139-x</a>               | 90  | 71   |
| tsai (2000)              | 1  | <a href="https://doi.org/10.1016/s0886-3350(99)00328-4">https://doi.org/10.1016/s0886-3350(99)00328-4</a>               | 24  | 63   |
| schwiergerling (2000)    | 1  | <a href="https://doi.org/10.1016/s0886-3350(99)00359-4">https://doi.org/10.1016/s0886-3350(99)00359-4</a>               | 10  | 78   |
| kim (1999)               | 1  | <a href="https://doi.org/10.1016/s0886-3350(99)80085-6">https://doi.org/10.1016/s0886-3350(99)80085-6</a>               | 51  | 60   |
| berendschot (2003)       | 4  | <a href="https://doi.org/10.1016/s1350-9462(02)00060-5">https://doi.org/10.1016/s1350-9462(02)00060-5</a>               | 119 | 93   |
| tervo (2003)             | 1  | <a href="https://doi.org/10.1016/s1350-9462(02)00064-2">https://doi.org/10.1016/s1350-9462(02)00064-2</a>               | 316 | 78   |
| nettune (2010)           | 7  | <a href="https://doi.org/10.1016/s1542-0124(12)70224-0">https://doi.org/10.1016/s1542-0124(12)70224-0</a>               | 208 | 86   |
| stefansson (2000)        | 2  | <a href="https://doi.org/10.1034/j.1600-0420.2000.078004374.x">https://doi.org/10.1034/j.1600-0420.2000.078004374.x</a> | 99  | 186  |
| broadbent (1999)         | 2  | <a href="https://doi.org/10.1038/eye.1999.43">https://doi.org/10.1038/eye.1999.43</a>                                   | 60  | 50   |
| jasvinder (2011)         | 3  | <a href="https://doi.org/10.1038/eye.2011.28">https://doi.org/10.1038/eye.2011.28</a>                                   | 40  | 54   |
| robles (2011)            | 3  | <a href="https://doi.org/10.1038/nphoton.2011.257">https://doi.org/10.1038/nphoton.2011.257</a>                         | 42  | 150  |
| juzeniene (2007)         | 6  | <a href="https://doi.org/10.1039/b705461k">https://doi.org/10.1039/b705461k</a>                                         | 14  | 207  |
| edwards (2003)           | 6  | <a href="https://doi.org/10.1063/1.1584078">https://doi.org/10.1063/1.1584078</a>                                       | 16  | 77   |
| raisler (2002)           | 4  | <a href="https://doi.org/10.1073/pnas.122247299">https://doi.org/10.1073/pnas.122247299</a>                             | 12  | 106  |
| gehres (2006)            | 4  | <a href="https://doi.org/10.1080/07853890600946724">https://doi.org/10.1080/07853890600946724</a>                       | 152 | 429  |
| fercher (2003)           | 3  | <a href="https://doi.org/10.1088/0034-4885/66/2/204">https://doi.org/10.1088/0034-4885/66/2/204</a>                     | 242 | 1459 |
| peng (2008)              | 6  | <a href="https://doi.org/10.1088/0034-4885/71/5/056701">https://doi.org/10.1088/0034-4885/71/5/056701</a>               | 44  | 144  |
| lee (2005a)              | 5  | <a href="https://doi.org/10.1093/ajhp/62.7.691">https://doi.org/10.1093/ajhp/62.7.691</a>                               | 53  | 174  |
| scholte (2001)           | 5  | <a href="https://doi.org/10.1097/00061198-200108000-00009">https://doi.org/10.1097/00061198-200108000-00009</a>         | 49  | 93   |
| kobayashi (2005)         | 7  | <a href="https://doi.org/10.1097/01.icc.0000160976.88824.2b">https://doi.org/10.1097/01.icc.0000160976.88824.2b</a>     | 7   | 79   |
| cillino (2004)           | 5  | <a href="https://doi.org/10.1097/01.ijg.0000137869.18156.81">https://doi.org/10.1097/01.ijg.0000137869.18156.81</a>     | 4   | 88   |
| freeman (2010)           | 3  | <a href="https://doi.org/10.1097/iae.0b013e3181bd2f94">https://doi.org/10.1097/iae.0b013e3181bd2f94</a>                 | 77  | 50   |
| zhang (2019)             | 7  | <a href="https://doi.org/10.1097/icl.0000000000000544">https://doi.org/10.1097/icl.0000000000000544</a>                 | 50  | 53   |
| gomes (2015)             | 6  | <a href="https://doi.org/10.1097/ico.0000000000000408">https://doi.org/10.1097/ico.0000000000000408</a>                 | 30  | 433  |
| vegunta (2016)           | 7  | <a href="https://doi.org/10.1097/ico.0000000000000735">https://doi.org/10.1097/ico.0000000000000735</a>                 | 17  | 75   |
| kaufman (2013)           | 7  | <a href="https://doi.org/10.1097/ico.0b013e3182541e9a">https://doi.org/10.1097/ico.0b013e3182541e9a</a>                 | 12  | 54   |
| zimmer-galler (2015)     | 2  | <a href="https://doi.org/10.1097/icu.0000000000000142">https://doi.org/10.1097/icu.0000000000000142</a>                 | 22  | 61   |
| adhi (2013)              | 3  | <a href="https://doi.org/10.1097/icu.0b013e32835f8bf8">https://doi.org/10.1097/icu.0b013e32835f8bf8</a>                 | 148 | 337  |
| williams (2018)          | 5  | <a href="https://doi.org/10.1097/ijg.0000000000000934">https://doi.org/10.1097/ijg.0000000000000934</a>                 | 26  | 69   |
| pinz (1998)              | 4  | <a href="https://doi.org/10.1109/42.730405">https://doi.org/10.1109/42.730405</a>                                       | 18  | 172  |
| shen (2001)              | 3  | <a href="https://doi.org/10.1109/4233.908405">https://doi.org/10.1109/4233.908405</a>                                   | 9   | 53   |
| sorokin (2005)           | 3  | <a href="https://doi.org/10.1109/jstqe.2003.850255">https://doi.org/10.1109/jstqe.2003.850255</a>                       | 62  | 92   |
| hoy (2014)               | 6  | <a href="https://doi.org/10.1109/jstqe.2013.2287098">https://doi.org/10.1109/jstqe.2013.2287098</a>                     | 44  | 81   |
| tanter (2009)            | 6  | <a href="https://doi.org/10.1109/tmi.2009.2021471">https://doi.org/10.1109/tmi.2009.2021471</a>                         | 18  | 161  |
| sakata (2009)            | 3  | <a href="https://doi.org/10.1111/j.1442-9071.2009.02015.x">https://doi.org/10.1111/j.1442-9071.2009.02015.x</a>         | 145 | 162  |
| guthoff (2009)           | 7  | <a href="https://doi.org/10.1111/j.1442-9071.2009.02016.x">https://doi.org/10.1111/j.1442-9071.2009.02016.x</a>         | 87  | 157  |
| fenwick (2012)           | 2  | <a href="https://doi.org/10.1111/j.1442-9071.2011.02599.x">https://doi.org/10.1111/j.1442-9071.2011.02599.x</a>         | 15  | 71   |
| mcalinden (2012)         | 1  | <a href="https://doi.org/10.1111/j.1444-0938.2012.00761.x">https://doi.org/10.1111/j.1444-0938.2012.00761.x</a>         | 150 | 51   |
| hove (2004)              | 2  | <a href="https://doi.org/10.1111/j.1600-0420.2004.00270.x">https://doi.org/10.1111/j.1600-0420.2004.00270.x</a>         | 50  | 66   |
| han (2004)               | 6  | <a href="https://doi.org/10.1117/1.1756919">https://doi.org/10.1117/1.1756919</a>                                       | 11  | 54   |
| hammer (2006)            | 4  | <a href="https://doi.org/10.1117/1.2335470">https://doi.org/10.1117/1.2335470</a>                                       | 8   | 60   |
| yamanari (2008)          | 3  | <a href="https://doi.org/10.1117/1.2841024">https://doi.org/10.1117/1.2841024</a>                                       | 133 | 89   |
| boas (2010)              | 3  | <a href="https://doi.org/10.1117/1.3285504">https://doi.org/10.1117/1.3285504</a>                                       | 9   | 645  |
| podoleanu (1998)         | 3  | <a href="https://doi.org/10.1117/1.429859">https://doi.org/10.1117/1.429859</a>                                         | 94  | 152  |
| molebny (2017)           | 3  | <a href="https://doi.org/10.1117/1.oe.56.3.031220">https://doi.org/10.1117/1.oe.56.3.031220</a>                         | 9   | 74   |
| drexler (1995)           | 3  | <a href="https://doi.org/10.1117/12.191809">https://doi.org/10.1117/12.191809</a>                                       | 127 | 54   |
| schmetterer (1995)       | 3  | <a href="https://doi.org/10.1117/12.193292">https://doi.org/10.1117/12.193292</a>                                       | 18  | 127  |
| konishi (1995)           | 3  | <a href="https://doi.org/10.1117/12.195203">https://doi.org/10.1117/12.195203</a>                                       | 2   | 56   |
| darlow (2013)            | 9  | <a href="https://doi.org/10.1136/archdischild-2011-301148">https://doi.org/10.1136/archdischild-2011-301148</a>         | 71  | 77   |
| nagar (2005)             | 5  | <a href="https://doi.org/10.1136/bjo.2004.052795">https://doi.org/10.1136/bjo.2004.052795</a>                           | 25  | 176  |
| reus (2007)              | 3  | <a href="https://doi.org/10.1136/bjo.2006.096586">https://doi.org/10.1136/bjo.2006.096586</a>                           | 66  | 58   |
| konstantopoulos (2007)   | 5  | <a href="https://doi.org/10.1136/bjo.2006.103408">https://doi.org/10.1136/bjo.2006.103408</a>                           | 34  | 224  |
| kristinsson (1997)       | 2  | <a href="https://doi.org/10.1136/bjo.81.4.274">https://doi.org/10.1136/bjo.81.4.274</a>                                 | 25  | 118  |
| laurell (2002)           | 8  | <a href="https://doi.org/10.1136/bjo.86.12.1380">https://doi.org/10.1136/bjo.86.12.1380</a>                             | 11  | 80   |
| abdel-meguid (2003)      | 4  | <a href="https://doi.org/10.1136/bjo.87.5.615">https://doi.org/10.1136/bjo.87.5.615</a>                                 | 44  | 61   |
| chan (2016)              | 6  | <a href="https://doi.org/10.1136/bjophthalmol-2015-307238">https://doi.org/10.1136/bjophthalmol-2015-307238</a>         | 49  | 63   |
| rodriguez (2019)         | 2  | <a href="https://doi.org/10.1155/2019/4940825">https://doi.org/10.1155/2019/4940825</a>                                 | 78  | 66   |
| schalnus (2003)          | 8  | <a href="https://doi.org/10.1159/000068563">https://doi.org/10.1159/000068563</a>                                       | 43  | 90   |
| wong (2020)              | 2  | <a href="https://doi.org/10.1159/000502387">https://doi.org/10.1159/000502387</a>                                       | 25  | 77   |
| vernon (2005)            | 3  | <a href="https://doi.org/10.1167/iovs.05-0087">https://doi.org/10.1167/iovs.05-0087</a>                                 | 59  | 54   |
| eter (2008)              | 4  | <a href="https://doi.org/10.1167/iovs.07-1322">https://doi.org/10.1167/iovs.07-1322</a>                                 | 1   | 64   |
| wolf-schnurrbusch (2008) | 4  | <a href="https://doi.org/10.1167/iovs.07-1460">https://doi.org/10.1167/iovs.07-1460</a>                                 | 68  | 102  |
| wakamatsu (2010)         | 7  | <a href="https://doi.org/10.1167/iovs.08-2722">https://doi.org/10.1167/iovs.08-2722</a>                                 | 35  | 67   |
| lofqvist (2009)          | 4  | <a href="https://doi.org/10.1167/iovs.08-2903">https://doi.org/10.1167/iovs.08-2903</a>                                 | 3   | 59   |
| yanni (2009)             | 2  | <a href="https://doi.org/10.1167/iovs.09-3652">https://doi.org/10.1167/iovs.09-3652</a>                                 | 11  | 54   |
| schweitzer (2010)        | 6  | <a href="https://doi.org/10.1167/iovs.09-3689">https://doi.org/10.1167/iovs.09-3689</a>                                 | 105 | 93   |
| mcalinden (2010)         | 1  | <a href="https://doi.org/10.1167/iovs.10-5341">https://doi.org/10.1167/iovs.10-5341</a>                                 | 31  | 190  |
| barker (2011)            | 4  | <a href="https://doi.org/10.1167/iovs.10-5898">https://doi.org/10.1167/iovs.10-5898</a>                                 | 34  | 120  |
| ang (2012)               | 6  | <a href="https://doi.org/10.1167/iovs.11-8808">https://doi.org/10.1167/iovs.11-8808</a>                                 | 43  | 76   |
| mukherjee (2012)         | 7  | <a href="https://doi.org/10.1167/iovs.12-9848">https://doi.org/10.1167/iovs.12-9848</a>                                 | 1   | 55   |
| labbe (2013)             | 7  | <a href="https://doi.org/10.1167/iovs.13-12370">https://doi.org/10.1167/iovs.13-12370</a>                               | 67  | 128  |
| kheirkhah (2015)         | 7  | <a href="https://doi.org/10.1167/iovs.15-17433">https://doi.org/10.1167/iovs.15-17433</a>                               | 46  | 89   |
| kelly (2007)             | 4  | <a href="https://doi.org/10.1172/jci32430">https://doi.org/10.1172/jci32430</a>                                         | 1   | 167  |
| arany (2016)             | 6  | <a href="https://doi.org/10.1177/0022034516648939">https://doi.org/10.1177/0022034516648939</a>                         | 3   | 79   |
| meinert (2000)           | 20 | <a href="https://doi.org/10.1177/112067210001000301">https://doi.org/10.1177/112067210001000301</a>                     | 0   | 92   |
| lexer (1997)             | 3  | <a href="https://doi.org/10.1364/aoe.4.0006548">https://doi.org/10.1364/aoe.4.0006548</a>                               | 131 | 141  |
| braaf (2013)             | 3  | <a href="https://doi.org/10.1364/boe.4.000051">https://doi.org/10.1364/boe.4.000051</a>                                 | 92  | 99   |
| scoles (2013)            | 4  | <a href="https://doi.org/10.1364/boe.4.001710">https://doi.org/10.1364/boe.4.001710</a>                                 | 27  | 94   |
| lu (2014)                | 3  | <a href="https://doi.org/10.1364/boe.5.000293">https://doi.org/10.1364/boe.5.000293</a>                                 | 98  | 136  |
| carrasco-zevallos (2017) | 3  | <a href="https://doi.org/10.1364/boe.8.001607">https://doi.org/10.1364/boe.8.001607</a>                                 | 143 | 81   |
| potsaid (2008)           | 3  | <a href="https://doi.org/10.1364/oe.16.015149">https://doi.org/10.1364/oe.16.015149</a>                                 | 161 | 314  |
| suzuki (2015)            | 3  | <a href="https://doi.org/10.1364/ol.40.000804">https://doi.org/10.1364/ol.40.000804</a>                                 | 7   | 51   |
| jiao (2005)              | 3  | <a href="https://doi.org/10.1364/opex.13.000444">https://doi.org/10.1364/opex.13.000444</a>                             | 75  | 164  |
| alvarez (2009)           | 2  | <a href="https://doi.org/10.1371/journal.pone.0007867">https://doi.org/10.1371/journal.pone.0007867</a>                 | 14  | 58   |
| rouland (2005)           | 5  | <a href="https://doi.org/10.2165/00002512-200522040-00004">https://doi.org/10.2165/00002512-200522040-00004</a>         | 19  | 50   |
| leese (2008)             | 2  | <a href="https://doi.org/10.2337/dc08-1098">https://doi.org/10.2337/dc08-1098</a>                                       | 5   | 81   |
| tur (1991)               | 22 | <a href="https://doi.org/10.2337/diacare.14.11.958">https://doi.org/10.2337/diacare.14.11.958</a>                       | 0   | 63   |
| villani (2014)           | 7  | <a href="https://doi.org/10.3109/02713683.2013.842592">https://doi.org/10.3109/02713683.2013.842592</a>                 | 205 | 139  |
| ooto (2015)              | 3  | <a href="https://doi.org/10.3109/02713683.2014.952828">https://doi.org/10.3109/02713683.2014.952828</a>                 | 226 | 61   |

|                   |   |                                                                                                                       |    |      |
|-------------------|---|-----------------------------------------------------------------------------------------------------------------------|----|------|
| lombardo (2013)   | 4 | <a href="https://doi.org/10.3390/s130100334">https://doi.org/10.3390/s130100334</a>                                   | 89 | 76   |
| tampa (2019)      | 6 | <a href="https://doi.org/10.3892/ol.2019.9939">https://doi.org/10.3892/ol.2019.9939</a>                               | 1  | 50   |
| zhang (2016)      | 7 | <a href="https://doi.org/10.3928/1081597x-20151111-06">https://doi.org/10.3928/1081597x-20151111-06</a>               | 50 | 96   |
| griffiths (2016)  | 4 | <a href="https://doi.org/10.3978/j.issn.2227-684x.2016.02.01">https://doi.org/10.3978/j.issn.2227-684x.2016.02.01</a> | 7  | 68   |
| alio (2012)       | 7 | 10.2174/138920112800624355                                                                                            | 10 | 77   |
| eydelman (2006)   | 1 | 10.3928/1081-597X-20060101-16                                                                                         | 14 | 85   |
| barbazetto (2003) | 4 | 10.1001/archopht.121.9.1253                                                                                           | 56 | 174  |
| jean (2003)       | 6 |                                                                                                                       | 15 | 83   |
| arnold (2001a)    | 4 | 10.1016/s0002-9394(01)00967-9                                                                                         | 40 | 731  |
| arnold (2001b)    | 4 | 10.1016/s0161-6420(01)00544-9                                                                                         | 30 | 378  |
| koznarova (2000)  | 2 | 10.1177/096368970000900617                                                                                            | 9  | 56   |
| bressler (1999)   | 4 |                                                                                                                       | 73 | 1365 |
| maloney (1995)    | 1 | 10.1016/s0161-6420(95)30913-x                                                                                         | 49 | 53   |
| sturmer (1993)    | 5 | 10.1016/s0161-6420(93)31552-6                                                                                         | 23 | 74   |
| vogel (1986)      | 3 | 10.1016/s0161-6420(86)33576-0                                                                                         | 10 | 129  |
| gupta (2016)      | 5 |                                                                                                                       | 66 | 65   |

---

**Supplementary Table 5. Average citations and total link strength of authors per cluster based on bibliographic coupling analysis (Authors) .**

| Authors                | Cluster | Total Link Strength | Avg. citations |
|------------------------|---------|---------------------|----------------|
| abela-formanek, c      | 4       | 1626                | 37             |
| abell, robin g.        | 1       | 1202                | 53.5           |
| agnifili, luca         | 1       | 505                 | 29.75          |
| ahmed, iqbal ike k.    | 1       | 1354                | 60.8           |
| aiello, lloyd paul     | 2       | 2090                | 159            |
| alio, jl               | 1       | 1986                | 60.5385        |
| alio, jorge l.         | 1       | 1749                | 40.6154        |
| amano, s               | 1       | 892                 | 73.6           |
| ambler, gareth         | 6       | 3675                | 22             |
| amon, m                | 4       | 2637                | 33.75          |
| ang, marcus            | 1       | 791                 | 42.25          |
| apple, dj              | 4       | 940                 | 84.25          |
| apte, rajendra s.      | 2       | 483                 | 56.5           |
| araie, makoto          | 6       | 2251                | 57             |
| archer, timothy j.     | 1       | 379                 | 15.5           |
| arnold, jennifer j.    | 8       | 1827                | 43.5           |
| auffarth, gerd u.      | 4       | 908                 | 28             |
| auffarth, gu           | 4       | 790                 | 74.8           |
| aung, t                | 3       | 1268                | 77.2857        |
| aung, tin              | 3       | 6069                | 25.8947        |
| autrata, r             | 1       | 1304                | 42             |
| azar, dt               | 1       | 910                 | 79.5           |
| azuara-blanco, augusto | 3       | 2033                | 19.6667        |
| bachernegg, alexander  | 4       | 812                 | 33.25          |
| bakri, sophie j.       | 2       | 2693                | 51             |
| bandello, francesco    | 2       | 1801                | 393            |
| barton, keith          | 6       | 3610                | 26.5           |
| baskaran, mani         | 3       | 2749                | 32             |
| baudouin, c.           | 1       | 664                 | 3.25           |
| baudouin, christophe   | 7       | 3513                | 95.2857        |
| beck, roy w.           | 2       | 2378                | 208.1667       |
| berliner, alyson j.    | 2       | 13975               | 142.1667       |
| billman, kathleen      | 2       | 2844                | 195.5          |
| boehm, myriam          | 1       | 802                 | 12.5           |
| bolz, matthias         | 2       | 5648                | 41.5455        |
| bowd, c                | 3       | 914                 | 70.75          |
| bowd, christopher      | 3       | 2924                | 28.5           |
| boyer, david           | 2       | 3916                | 254            |
| boyer, david s.        | 2       | 15416               | 256.4286       |
| bressler, neil m.      | 2       | 4742                | 155.1          |
| bressler, nm           | 5       | 282                 | 338.6          |
| brinkmann, ralf        | 2       | 2148                | 6.2857         |
| brown, david m.        | 2       | 15756               | 244.7647       |
| brown, gary c.         | 2       | 2993                | 69.5           |
| buehl, w               | 4       | 3302                | 48.5           |
| buehl, wolf            | 4       | 1761                | 32.5           |
| buehren, jens          | 1       | 850                 | 19             |
| buhren, j              | 1       | 1545                | 32.7143        |
| bunce, catey           | 6       | 4788                | 24.375         |
| buzney, sm             | 2       | 69                  | 7              |
| campochiaro, peter a.  | 2       | 8327                | 181.9286       |
| cavanagh, hd           | 1       | 1572                | 57.1429        |
| chakravarthy, usha     | 8       | 3085                | 88             |
| chan, r. v. paul       | 5       | 1240                | 15.4           |
| chauhan, balwantray c. | 3       | 1599                | 76.8571        |
| chen, fred k.          | 8       | 2190                | 26.6667        |
| chen, philip p.        | 3       | 2461                | 47.6           |
| chew, emily y.         | 8       | 1016                | 16.25          |
| chew, paul t. k.       | 3       | 2187                | 22.2           |
| chew, ptk              | 3       | 694                 | 101.25         |
| chiang, michael f.     | 5       | 1338                | 18.2857        |
| chu, renyuan           | 1       | 846                 | 19.25          |
| ciulla, thomas a.      | 2       | 3561                | 130            |
| congdon, nathan        | 3       | 1027                | 30.5           |
| cox, ig                | 1       | 694                 | 58.75          |
| culbertson, ww         | 1       | 1704                | 95.6           |
| curcio, christine a.   | 8       | 766                 | 59.5           |
| dana, reza             | 7       | 1708                | 38.5           |
| desmettre, t           | 9       | 710                 | 130.75         |
| devoisselle, jm        | 9       | 789                 | 109.2          |
| dexl, alois k.         | 4       | 812                 | 33.25          |
| dick, h. burkhard      | 1       | 328                 | 21.75          |
| dick, hb               | 1       | 781                 | 37.2           |
| do, diana v.           | 2       | 10004               | 209.6          |
| dogru, murat           | 7       | 3750                | 49.8182        |
| drener, kimberly a.    | 5       | 396                 | 19             |
| drexler, w             | 4       | 5497                | 209.6364       |
| dua, harminder s.      | 1       | 1482                | 35.5           |
| duker, jay s.          | 4       | 1427                | 123.5          |
| ehlers, justis p.      | 2       | 3475                | 45.2           |
| ehrlich, jason s.      | 2       | 4334                | 272.6          |
| elman, michael j.      | 2       | 2214                | 239.5          |
| fankhauser, f          | 9       | 121                 | 7.5            |
| farsiu, sina           | 4       | 873                 | 40.6           |



|                            |   |       |          |
|----------------------------|---|-------|----------|
| fauser, sascha             | 7 | 2408  | 47.2     |
| fercher, af                | 4 | 4443  | 266.5    |
| findl, o                   | 4 | 6741  | 46.3684  |
| findl, oliver              | 4 | 2528  | 21.2     |
| finger, robert p.          | 8 | 1587  | 35.5     |
| flaxel, christina j.       | 2 | 3532  | 199.25   |
| fleckenstein, monika       | 8 | 1319  | 52.75    |
| fontana, luigi             | 3 | 224   | 20.5     |
| foster, paul j.            | 3 | 2948  | 27.3333  |
| francis, brian a.          | 3 | 3264  | 77.4444  |
| freeman, william r.        | 2 | 845   | 33.5     |
| friedman, david s.         | 3 | 4357  | 30.5714  |
| fujimoto, james g.         | 4 | 2486  | 247.8571 |
| garg, anurag               | 6 | 3929  | 23.75    |
| garway-heath, david        | 6 | 4111  | 27       |
| gazzard, g                 | 3 | 1177  | 63.25    |
| gazzard, gus               | 6 | 4533  | 24.4286  |
| georgopoulos, michael      | 4 | 1081  | 22.5     |
| gibson, andrea             | 2 | 5674  | 277.5    |
| girkin, christopher a.     | 3 | 2564  | 73.6     |
| glassman, adam r.          | 2 | 3559  | 183.875  |
| grabner, g                 | 1 | 341   | 19.75    |
| grabner, guenther          | 4 | 812   | 33.25    |
| grzybowski, andrzej        | 7 | 741   | 7        |
| guell, jl                  | 1 | 493   | 44.5     |
| guthoff, rudolf f.         | 7 | 927   | 40.5     |
| guymer, robyn h.           | 8 | 2359  | 31       |
| haller, julia a.           | 2 | 2552  | 119.25   |
| hamrah, pedram             | 7 | 5367  | 58.8     |
| hangai, masanori           | 3 | 1311  | 82.5     |
| hardten, dr                | 1 | 463   | 28.75    |
| harper, colin a.           | 8 | 1614  | 30.5     |
| hashemi, hassan            | 1 | 365   | 6.4      |
| he, mingguang              | 3 | 3073  | 31.3     |
| heier, jeffrey s.          | 2 | 6855  | 227.4286 |
| hemkeppler, eva            | 1 | 656   | 11.5     |
| hengerer, fritz h.         | 1 | 1100  | 53.8     |
| hersh, ps                  | 1 | 1204  | 45.3333  |
| hitzenberger, christoph k. | 4 | 2355  | 61.5     |
| hitzenberger, ck           | 4 | 4384  | 286.4286 |
| ho, allen c.               | 2 | 2681  | 103.2    |
| holz, frank g.             | 2 | 11131 | 120.6111 |
| htoon, hla m.              | 3 | 800   | 22.25    |
| hu, fr                     | 1 | 1029  | 32.5     |
| huang, david               | 1 | 1659  | 249.8    |
| huang, jia                 | 1 | 970   | 12.5     |
| ibrahim, osama m. a.       | 7 | 1356  | 52       |
| igarashi, akihito          | 1 | 1385  | 32.8333  |
| ishaq, mazhar              | 1 | 456   | 5.25     |
| issa, peter charbel        | 8 | 1330  | 41.7143  |
| iwase, aiko                | 3 | 997   | 65.25    |
| izatt, joseph a.           | 4 | 1127  | 38       |
| jaffe, glenn j.            | 2 | 4824  | 255.5    |
| jampel, henry d.           | 3 | 2706  | 114.6667 |
| jampol, lee m.             | 2 | 2526  | 138      |
| jester, jv                 | 1 | 1350  | 75.4     |
| jhanji, vishal             | 1 | 839   | 26.8     |
| joo, choun-ki              | 1 | 533   | 32.5     |
| kaemmerer, m               | 1 | 973   | 101.2    |
| kahook, malik y.           | 6 | 1608  | 9.2      |
| kaiserman, igor            | 1 | 877   | 13.6     |
| kamiya, kazutaka           | 1 | 1385  | 32.8333  |
| kampik, anselm             | 1 | 260   | 10.25    |
| kapik, barry               | 2 | 2844  | 195.5    |
| katsanos, andreas          | 6 | 3691  | 15.6667  |
| kheirkhah, ahmad           | 7 | 1416  | 37.6     |
| kim, ek                    | 1 | 1497  | 58.875   |
| kim, eung kweon            | 1 | 1013  | 23.5     |
| kim, jk                    | 1 | 817   | 31.75    |
| kim, stephen j.            | 2 | 4568  | 41.2857  |
| kim, tae-im                | 1 | 893   | 22.2     |
| kivela, t                  | 5 | 384   | 39       |
| klein, ronald              | 2 | 1904  | 108.75   |
| koch, dd                   | 1 | 1574  | 118.4    |
| koch, douglas d.           | 4 | 1202  | 28.6667  |
| kohnen, t                  | 1 | 2337  | 35.5455  |
| kohnen, thomas             | 1 | 4515  | 19.8947  |
| kojima, takashi            | 7 | 2381  | 60       |
| kolodjaschna, j            | 4 | 1084  | 26.5     |
| komatsu, mari              | 1 | 945   | 28.25    |
| konstantakopoulou, evgenia | 6 | 3929  | 23.75    |
| korobelnik, jean-francois  | 2 | 5132  | 170.8    |
| kriechbaum, k              | 4 | 1921  | 61.75    |
| kriechbaum, katharina      | 2 | 834   | 79.6     |
| krieglstein, gk            | 4 | 274   | 21       |
| kristinsson, jk            | 2 | 1450  | 69.5     |

|                           |   |       |          |
|---------------------------|---|-------|----------|
| krueger, rr               | 1 | 654   | 62.3333  |
| kruger, a                 | 4 | 2415  | 44.9091  |
| kruse, friedrich e.       | 1 | 637   | 14.5     |
| kuchle, m                 | 1 | 575   | 99.8     |
| kumar, rajesh s.          | 3 | 1819  | 22       |
| kunikata, hiroshi         | 6 | 290   | 8.75     |
| kuppermann, baruch d.     | 2 | 2290  | 59.6     |
| kymionis, george d.       | 1 | 1153  | 42.6     |
| la cour, morten           | 2 | 162   | 27       |
| lam, dsc                  | 1 | 560   | 89.5     |
| langenbucher, a           | 1 | 1521  | 49.1667  |
| langenbucher, a.          | 1 | 400   | 6.5      |
| langenbucher, achim       | 1 | 508   | 5.25     |
| lavanya, raghavan         | 3 | 1846  | 43.25    |
| lee, aaron y.             | 6 | 119   | 5.75     |
| lee, dh                   | 1 | 604   | 27.75    |
| lee, hk                   | 1 | 817   | 31.75    |
| lemij, hg                 | 3 | 1064  | 45.75    |
| leung, christopher k. s.  | 3 | 1085  | 57.5     |
| leydolt, christina        | 4 | 1336  | 13.4     |
| li, tianjing              | 3 | 791   | 46       |
| li, xiaoxin               | 2 | 1256  | 44.75    |
| liebmann, jeffrey m.      | 3 | 2224  | 44.6     |
| lin, jm                   | 1 | 426   | 19       |
| lin, shan c.              | 3 | 3272  | 76.2222  |
| liu, shu                  | 3 | 1303  | 71.25    |
| loewenstein, anat         | 2 | 2141  | 27.3333  |
| lois, noemi               | 2 | 1326  | 13.6     |
| lum, flora                | 3 | 259   | 6.75     |
| luu, chi d.               | 8 | 2359  | 31       |
| luyten, gpm               | 1 | 584   | 53.75    |
| macrae, s                 | 1 | 776   | 56.75    |
| maguire, maureen g.       | 2 | 1629  | 16       |
| maloney, rk               | 1 | 1632  | 49.625   |
| manche, edward e.         | 1 | 1076  | 29       |
| manche, ee                | 1 | 1583  | 35       |
| marcus, dennis m.         | 2 | 6759  | 386      |
| marshall, j               | 1 | 3370  | 45.8333  |
| marshall, john            | 1 | 515   | 23       |
| mashayekhi, arman         | 5 | 491   | 22.5     |
| mastropasqua, alessandra  | 1 | 1225  | 24       |
| mastropasqua, leonardo    | 1 | 1733  | 30       |
| matsumoto, yukihiro       | 7 | 2180  | 46.625   |
| mattei, peter a.          | 1 | 1225  | 24       |
| mayer, wolfgang j.        | 1 | 2256  | 18.7143  |
| mcculley, jp              | 1 | 879   | 29.25    |
| mcdonald, mb              | 1 | 1141  | 44.6667  |
| mcguinness, myra b.       | 8 | 1672  | 40.8     |
| medeiros, felipe a.       | 3 | 4042  | 69.8889  |
| mehta, jodhbir s.         | 1 | 2919  | 39.4545  |
| melia, michele            | 2 | 3231  | 127.1429 |
| menabuoni, luca           | 1 | 181   | 26.4     |
| menapace, r               | 4 | 5635  | 62.8333  |
| menapace, rupert          | 4 | 3522  | 17.9231  |
| metzig, carola            | 2 | 10460 | 140.875  |
| midena, edoardo           | 2 | 4853  | 231.6    |
| mikropoulos, dimitrios g. | 6 | 2317  | 19.25    |
| mimouni, michael          | 1 | 757   | 6        |
| mirshahi, a               | 1 | 857   | 41.75    |
| mirshahi, alireza         | 1 | 1817  | 3.5      |
| mittell, paul             | 2 | 5817  | 168.2727 |
| miura, yoko               | 2 | 1655  | 10       |
| mohammadpour, mehrdad     | 1 | 488   | 8.8      |
| mordon, s                 | 9 | 710   | 130.75   |
| moshifarf, majid          | 1 | 560   | 19.4286  |
| mrochen, m                | 1 | 1854  | 69.1     |
| mruthunjaya, prithvi      | 2 | 2309  | 36.25    |
| nakazawa, toru            | 6 | 336   | 8.6      |
| nathwani, neil            | 6 | 3929  | 23.75    |
| naumann, goh              | 1 | 456   | 101      |
| neumayer, thomas          | 4 | 1674  | 28.25    |
| nguyen, quan d.           | 2 | 5532  | 272      |
| nicolela, marcelo t.      | 3 | 1343  | 86.1667  |
| nishida, kohji            | 1 | 509   | 117.5    |
| nishida, t                | 1 | 278   | 40.8     |
| nongpiur, monisha e.      | 3 | 1822  | 19.5     |
| nudleman, eric            | 5 | 415   | 11.75    |
| o'brart, dps              | 1 | 1563  | 77.75    |
| o'brien, terrence p.      | 1 | 841   | 40.5     |
| ooto, sotaro              | 3 | 1090  | 41.2     |
| oshika, t                 | 1 | 1428  | 53.375   |
| pablo, luis e.            | 3 | 948   | 31.5     |
| pearce, ian               | 2 | 1665  | 43.25    |
| perez-santonja, jj        | 1 | 851   | 52       |
| pesudovs, konrad          | 1 | 434   | 75.25    |
| petermann, kerstin        | 1 | 1891  | 12       |

|                              |   |       |          |
|------------------------------|---|-------|----------|
| petroll, wm                  | 1 | 1276  | 83.25    |
| peternel, v                  | 4 | 774   | 21.2     |
| pinero, david p.             | 1 | 873   | 27.75    |
| pircher, michael             | 4 | 2355  | 61.5     |
| polo, vicente                | 3 | 948   | 31.5     |
| potsaid, benjamin            | 4 | 1558  | 263      |
| priglinger, siegfried        | 1 | 1684  | 27.25    |
| puliafita, ca                | 4 | 2063  | 140.375  |
| qian, yishan                 | 1 | 970   | 12.5     |
| quan dong nguyen             | 2 | 6238  | 264.2857 |
| quaranta, luciano            | 6 | 2616  | 20.5     |
| querques, giuseppe           | 7 | 309   | 45.75    |
| quinn, graham e.             | 5 | 420   | 64.8     |
| rainer, g                    | 4 | 1558  | 45.5     |
| rajan, ms                    | 1 | 1958  | 54.4     |
| raman, rajiv                 | 2 | 1083  | 16.5     |
| ramasamy, kim                | 2 | 939   | 11.2     |
| ramulu, pradeep y.           | 3 | 1535  | 38.8     |
| randleman, j. bradley        | 1 | 427   | 38.2     |
| rapuano, cj                  | 1 | 2070  | 106.8    |
| rathjen, christian           | 1 | 1912  | 2.5      |
| regillo, cd                  | 5 | 269   | 80.5     |
| rehurek, j                   | 1 | 1304  | 42       |
| reinstein, dan z.            | 1 | 379   | 15.5     |
| reus, nj                     | 3 | 644   | 62       |
| roider, johann               | 2 | 1201  | 26.6     |
| rosman, mohamad              | 1 | 547   | 23.5     |
| rubio, roman g.              | 2 | 3542  | 328.8    |
| sacu, s                      | 4 | 2493  | 49.6667  |
| sacu, stefan                 | 4 | 1824  | 31       |
| sadda, srinivas              | 8 | 1083  | 25       |
| sadda, srinivas r.           | 8 | 2338  | 24.5556  |
| saroj, namrata               | 2 | 7045  | 67.7143  |
| schallhorn, julie m.         | 1 | 690   | 10.8     |
| schallhorn, steven c.        | 1 | 1606  | 35       |
| schauersberger, j            | 4 | 2505  | 37.9     |
| schild, g                    | 4 | 2194  | 47.2857  |
| schlenker, matthew b.        | 1 | 1154  | 73.5     |
| schlingemann, reinier o.     | 2 | 3207  | 242.8    |
| schmelter, thomas            | 2 | 5899  | 323      |
| schmetterer, l               | 4 | 243   | 27.5     |
| schmetterer, leopold         | 7 | 1252  | 10.25    |
| schmidt-erfurth, um          | 5 | 319   | 64       |
| schmidt-erfurth, ursula      | 2 | 10931 | 206.2667 |
| schmitz-valckenberg, steffen | 8 | 1588  | 51.2     |
| schoenberger, scott d.       | 2 | 2951  | 46.75    |
| scholda, christoph           | 2 | 4162  | 55.8571  |
| scholl, hendrik p. n.        | 7 | 1574  | 36       |
| schuman, joel s.             | 3 | 1590  | 78       |
| schuman, js                  | 3 | 729   | 88.25    |
| schwarzenbacher, luca        | 4 | 868   | 2.25     |
| scott, ingrid u.             | 2 | 2229  | 104.8333 |
| seiler, t                    | 1 | 1901  | 68.4545  |
| seitz, b                     | 1 | 1765  | 38.7778  |
| seitz, b.                    | 1 | 400   | 6        |
| seitz, berthold              | 7 | 929   | 8.8889   |
| seo, kyoung yul              | 1 | 952   | 26.4     |
| seong, gj                    | 1 | 889   | 49.25    |
| shah, gaurav k.              | 2 | 55    | 6.5      |
| shah, syed mahmood           | 2 | 2388  | 175.4    |
| shajari, mehdi               | 1 | 2018  | 7.1429   |
| sharp, pf                    | 4 | 347   | 56.75    |
| shcherbakov, i. a.           | 1 | 160   | 2        |
| shields, carol l.            | 5 | 1116  | 26.3333  |
| shields, cl                  | 5 | 404   | 69.7143  |
| shields, ja                  | 5 | 404   | 69.7143  |
| shields, jerry a.            | 5 | 1116  | 26.3333  |
| shimizu, kimiya              | 1 | 1239  | 28.8     |
| shtein, roni m.              | 1 | 529   | 23.75    |
| silva, paolo s.              | 2 | 4701  | 98.8     |
| simader, christian           | 2 | 5639  | 400.4    |
| singh, kuldev                | 3 | 2945  | 92.5714  |
| singh, rishi p.              | 2 | 4033  | 14       |
| sivaprasad, sobha            | 2 | 4863  | 8.875    |
| smith, scott d.              | 3 | 2873  | 107.3333 |
| soo, yuhwen                  | 2 | 9288  | 196      |
| soubrane, g                  | 5 | 78    | 78       |
| stachs, oliver               | 7 | 950   | 34       |
| stalman, ingeborg            | 3 | 464   | 50.6     |
| staurengi, giovanni          | 2 | 3511  | 20.8333  |
| stefansson, e                | 2 | 1030  | 82.4     |
| steinert, rf                 | 1 | 465   | 22.75    |
| stifter, eva                 | 4 | 1378  | 24       |
| stulting, rd                 | 1 | 1138  | 93.5     |
| sugar, a                     | 1 | 1999  | 130.5    |
| sun, jennifer k.             | 2 | 6607  | 91.8     |

|                       |   |       |          |
|-----------------------|---|-------|----------|
| tanzer, david j.      | 1 | 1134  | 63       |
| tasman, w             | 5 | 272   | 85.25    |
| terasaki, hiroko      | 2 | 6061  | 258      |
| teus, miguel a.       | 6 | 1590  | 13.75    |
| theisen-kunde, dirk   | 2 | 1590  | 6.25     |
| thompson, desmond     | 2 | 3677  | 16       |
| thompson, kp          | 1 | 712   | 127.5    |
| tommila, p            | 5 | 367   | 38       |
| toth, jozsef          | 5 | 13    | 0.25     |
| toto, lisa            | 1 | 1327  | 19.2     |
| trese, michael t.     | 5 | 466   | 17.8     |
| tsai, james c.        | 3 | 428   | 32.4     |
| tsai, yy              | 1 | 426   | 19       |
| tsubota, kazuo        | 7 | 2754  | 38.2308  |
| tsujikawa, akitaka    | 3 | 381   | 31       |
| tuuminen, raimo       | 4 | 235   | 7.75     |
| varma, rohit          | 2 | 1925  | 27.8     |
| vecchiarino, luca     | 1 | 1135  | 23       |
| vernon, sa            | 3 | 922   | 22.4     |
| vickerstaff, victoria | 6 | 3675  | 22       |
| villani, edoardo      | 7 | 1675  | 69.5     |
| viola, francesco      | 8 | 304   | 42.75    |
| vitti, robert         | 2 | 14874 | 144.8333 |
| vote, brendan j.      | 1 | 1202  | 53.5     |
| wachler, bsb          | 1 | 1465  | 50       |
| wang, li              | 1 | 806   | 31.6667  |
| wedrich, andreas      | 2 | 4652  | 1.5      |
| weinreb, rn           | 3 | 1173  | 65.4     |
| weinreb, robert n.    | 3 | 5445  | 68.0625  |
| werner, john s.       | 4 | 1179  | 13.2     |
| wirbelauer, c         | 1 | 943   | 25.6     |
| wirtitsch, m          | 4 | 2717  | 48.8333  |
| wollstein, g          | 3 | 747   | 77.25    |
| wong, hon-tym         | 3 | 1819  | 22       |
| wong, tien y.         | 3 | 3147  | 129      |
| wong, tien yin        | 3 | 1126  | 80       |
| wormald, richard      | 6 | 3598  | 57.5     |
| wu, wei-chi           | 5 | 1191  | 37       |
| wu, zhichao           | 8 | 1934  | 32.6     |
| wyckoff, charles c.   | 2 | 7683  | 27.7273  |
| yamanaka, a           | 1 | 595   | 27.6     |
| ye, cong              | 3 | 1628  | 69.6     |
| yeh, steven           | 2 | 2951  | 46.75    |
| ying, gui-shuang      | 3 | 692   | 14.2     |
| yoo, sonia h.         | 1 | 763   | 26.3333  |
| yoshimura, nagahisa   | 3 | 1437  | 70       |
| yu, fei               | 3 | 192   | 33.25    |
| yu, marco             | 3 | 1682  | 41.6667  |
| zangwill, linda m.    | 3 | 4778  | 68.7273  |
| zangwill, lm          | 3 | 1173  | 65.4     |
| zawadzki, robert j.   | 4 | 1229  | 14       |
| zebardast, nazlee     | 3 | 1392  | 10.2     |
| zeitz, oliver         | 2 | 9771  | 191.8571 |
| zhou, xingtao         | 1 | 1205  | 14.7143  |

---
